# Supplementary material
Source: PubMed Central journal article supplement (PMC3677224)
Supplement: NIHMS459784-supplement-Supplementary_Information.pdf [file NIHMS459784-supplement-Supplementary_Information.pdf]

## Materials and Methods

### Identification of gene fusions from whole transcriptome (RNA-seq) and exome sequencing

RNA-Sequencing was performed from total RNA extracted from GSC cultures isolated from nine GBM patients using Illumina HiSeq 2000, producing roughly 60.3 million paired reads per sample. Using the global alignment software Burrows-Wheeler Aligner (BWA) (1) with modified Mott's trimming, an initial seed length of 32, maximum edit distance of 2 and a maximum gap number of 1, on average 43.1 million reads were mapped properly to the RefSeq transcriptome and, of the remaining, 8.6 million were mapped to the hg19 genome per sample. We considered the remaining 14.3% of paired reads—including those that failed to map to either transcriptome or genome with proper forward-reverse (F-R) orientation, within expected insert size, and with minimal soft clipping (unmapped portions at the ends of a read)—to be appropriate for gene fusion analysis.

We constructed a novel computational pipeline called ***TX-Fuse*** that identifies two sources of evidence for the presence of a gene fusion: 1. *Split inserts*, in which each read of a mate pair maps entirely to one side of a breakpoint, and 2. Individual *split reads* that span a breakpoint. Split inserts are readily detected from BWA mapping. On the other hand, split reads demand precision alignment of smaller nucleotide stretches. To that end, our pipeline employs the local alignment package BLAST with word size of 20, identity cutoff of 95%, expectation cutoff of  $10^{-4}$ , and soft filtering to map raw paired reads against the RefSeq transcriptome. From this procedure, we obtained a list of potential split reads that were

filtered to ensure maintenance of coding frame in the predicted fusion transcript given the proper F-R orientation in the read pair. We also screened out false positive candidates produced from paralogous gene pairs using the Duplicated Genes Database and the EnsemblCompara GeneTrees (2). Pseudogenes in the candidate list were annotated using the list from HUGO Gene Nomenclature Committee (HGNC) database (3) and given lower priority. For each remaining gene fusion candidate, we created a virtual reference based on the predicted fusion transcript and re-mapped all unmapped reads using BLAST with word size of 16, identity cutoff of 85%, query coverage greater than 85%, and expectation cutoff of  $10^{-4}$  to obtain a final count of split reads and inserts. Moreover, sequencing depth per base of the virtual reference was calculated to corroborate that components of each gene participating in the gene fusion were highly expressed.

To establish the recurrence of our initial panel of gene fusion candidates, we modified our gene fusion discovery pipeline to produce ***EXome-Fuse***, which probes for fusions within the available dataset of paired-read exome DNA sequencing of 336 matched GBM samples from TCGA. To increase sensitivity for gene fusion identification, we aligned reads unmapped by BWA to the gene pair participating in each fusion candidate using a BLAST word size of 24 for split inserts and 16 for split read and split insert discovery. Given that the breakpoint detected in DNA cannot directly indicate the resulting breakpoint in the transcribed RNA, we could not ensure fusion candidates to maintain coding frame. Moreover, we made no restriction on split insert orientation. For split reads, we only required that the component of the split read mapped to the same gene as its mate maintained F-R directionality.

## Co-outlier expression and CNV analysis from Atlas-TCGA GBM samples

Tomlins et al. (4) reported that outlier gene expression from microarray datasets identifies candidate oncogenic gene fusions. Wang et al. (5) suggested a “breakpoint principle” for intragenic copy number aberrations in fusion partners. We combined the two principles (outlier expression and intragenic CNV) to identify candidate gene fusions in GBM samples from Atlas-TCGA. Genomic and expression data sets were downloaded from TCGA public data portal as available on December 1, 2011, where a description of TCGA data types, platforms, and analyses is also available (6). Specific data sources were (according to Data Levels and Data Types) as follows: Expression data, “Level 2” normalized signals per probe set (Affymetrix HT\_HG-U133A) of 526 samples; Copy number data, “Level 1” raw signals per probe (Affymetrix Genome-Wide Human SNP Array 6.0) of 1070 samples (tumor and matched normal control).

The gene expression analysis was performed first using R (7). We calculated the median absolute deviation (MAD) and then we labeled a gene as an outlier according to the following formula:  $Z_{i,j} = 0.6745(x_{i,j} - \text{mean}(x_i)) / \text{MAD}_i > 3.5$  (8). Samples were identified as ECFS (expression candidate fusion sample) if both genes of interest (e. g. FGFR3 and TACC3) displayed outlier behavior (co-outliers). Next, ECFS were analyzed for CNV using pennCNV (9). Tumors samples were paired to their normal controls to obtain the log ratio values and the VEGA algorithm was used to obtain a more accurate segmentation (10). If genomic aberrations are revealed, the samples are identified as GECFS (genomic and

expression candidate fusion sample). The GBM samples TCGA-27-1835, TCGA-19-5958, TCGA-06-6390, TCGA-12-0826 were identified as GECFS for FGFR3-TACC3.

### **Cell culture and isolation and culture of GSCs**

Rat1A, mouse astrocytes *Ink4A;Arf*<sup>-/-</sup>, Balb 3T3 and human astrocytes were cultured in DMEM supplemented with 10% Fetal Bovine Serum. Specimens of newly diagnosed GBM were dissociated using the Papain Dissociation System (Worthington Biomedical Corporation). Cells were grown in neurobasal medium (Invitrogen) supplemented with B27, N2 (Invitrogen), EGF (50 ng/ml, PeproTech) and FGF2 (50 ng/ml, PeproTech) to establish gliomasphere cultures enriched for GSCs. For treatment *in vitro* with PD173074, AZD4547 or BJJ398 cells infected with vector control, FGFR3, TACC3, FGFR-TACC fusions or FGFR3-TACC3-K508M were seeded in 96-well plates and treated with increasing concentrations of FGFR inhibitors. After 72-120 h, cell viability measured using the 3-(4,5-dimethylthiazol-2-yl)-2,5-diphenyl tetrazolium bromide (MTT) assay. Data were expressed as mean±SD. Growth rate in GSC-1123 infected with sh-Ctr or shRNA lentiviruses targeting FGFR3 was determined by plating dissociated gliomaspheres at  $2 \times 10^4$  cells/well in twelve-well plates post 5 days of infection. The number of viable cells was determined by trypan blue exclusion in triplicate cultures obtained from triplicate independent infections. Cell number was scored every other day.

### **Karyotyping**

Cultured cells were treated with 0.02 µg/ml colcemid for 90 minutes at 37°C. The cells were then trypsinized, centrifuged for 7 minutes at 200 x g, and the cell pellet re-suspended in warmed hypotonic solution and incubated at 37°C for 13 minutes. The swollen cells were then centrifuged and the pellet re-suspended in 8 ml of Carnoy's fixative (3:1 methanol:glacial acetic acid). The cell suspension was centrifuged and washed twice in Carnoy's fixative. After the last centrifugation, the cells were resuspended in 0.5 to 1 ml of freshly prepared fixative to produce an opalescent cell suspension. Drops of the final cell suspension were placed on clean slides and air-dried. Slides were stained with DAPI and metaphases were analyzed under a fluorescent microscope. At least 100 cells in metaphase were examined for chromosome count. PMSCS was scored in cells where a majority of the sister chromosomes were no longer associated. Two-tailed unpaired t-tests with Welch's correction were performed for comparison of means analysis.

### **Genomic and mRNA RT-PCR**

Total RNA was extracted from cells by using RNeasy Mini Kit (QIAGEN), following the manufacturer instructions. 500 ng of total RNA was retro-transcribed by using the Superscript III kit (Invitrogen), following the manufacturer instructions. The cDNAs obtained after the retro-transcription was used as templates for qPCR as described (11, 12). The reaction was performed with a Roche480 thermal cycler, using the Absolute Blue QPCR SYBR Green Mix from Thermo Scientific. The relative amount of specific mRNA was normalized to 18S. Results are presented as the mean±SD of triplicate amplifications. The validation of fusion transcripts was performed using both genomic and RT-PCR with

forward and reverse primer combinations designed within the margins of the paired-end read sequences detected by RNA-seq. To identify novel fusion transcripts within the GBM cohort, PCR primers pairs were designed to bind upstream to the TK domain of the FGFR genes and inside or downstream of the Coiled Coil domain of the TACC genes. Expressed fusion transcript variants were subjected to direct sequencing to confirm sequence and translation frame. Primers used are:

hFGFR3-RT-FW1: 5'-GTAACCTGCGGGAGTTTCTG-3';

hFGFR3-RT-REV1: 5'-ACACCAGGTCCTTGAAGGTG-3';

hTACC3-RT-FW2: 5'-CCTGAGGGACAGTCCTGGTA-3';

hTACC3-RT-REV2: 5'-AGTGCTCCCAAGAAATCGAA-3';

hWRAP53-RT-FW1: 5'-AGAGGTGACCACCAATCAGC-3';

hWRAP53-RT-REV1: 5'-CGTGTCCCACACAGAGACAG-3';

Primers used for the screening of FGFR-TACC fusions are:

FGFR3-FW1: 5'-CGTGAAGATGCTGAAAGACGATG-3';

TACC3-REV1: 5'- AAACGCTTGAAGAGGTCGGAG-3';

FGFR1-FW1: 5'-ATGCTAGCAGGGGTCTCTGA-3';

TACC1-REV1: 5'-CCCTTCCAGAACACCTTTCA-3';

Primers used for genomic detection of FGFR3-TACC3 fusion in GBM-1123 and GSC-1123 are:

genomicFGFR3-FW1: 5'-ATGATCATGCGGGAGTGC-3';

genomicTACC3-REV1: 5'-GGGGGTGCGAACTTGAGGTAT-3';

Primers used to validate fusions detected by RNA-seq are:

POLR2A-FW1: 5'-CGCAGGCTTTTTGTAGTGAG-3';

WRAP53-REV1: 5'-TGTAGGCGCGAAAGGAAG-3';  
PIGU-FW1: 5'-GAACTCATCCGGACCCCTAT-3';  
NCOA6-REV1: 5'-GCTTTCCCCATTGCACTTTA-3';  
ST8SIA4-FW1: 5'-GAGGAGAGAAGCACGTGGAG-3';  
PAM-REV1: 5'-GGCAGACGTGTGAGGTGTAA-3';  
CAPZB-FW: 5'-GTGATCAGCAGCTGGACTGT-3';  
UBR4-REV1: 5'-GAGCCTGGGCATGGATCT-5';

### **Cloning and Lentiviral production**

Lentiviral expression vectors, pLOC-GFP (Open Biosystems) and pTomo-shp53, were used to clone FGFR3, TACC3, FGFR3-TACC3, FGFR3-TACC3-K508M, and FGFR1-TACC1. pTomo-shp53 was a gift of Inder Verma and Dinorah Friedman-Morvinski (Salk Institute, San Diego). The FGFR3-TACC3-K508M mutant was generated using the Phusion Site Direct Mutagenesis kit (NEB, USA). MISSION shRNAs clones (pLKO.1 lentiviral expression vectors) against FGFR3 were purchased from Sigma. The hairpin sequences targeting the *FGFR3* gene are-

5'-TGCGTCGTGGAGAACAAGTTT-3' (#TRCN0000000372; Sh#2);  
5'-GTTCCACTGCAAGGTGTACAG-3' (#TRCN0000430673; Sh#3);  
5'-GCACAACCTCGACTACTACAA-3' (#TRCN0000000374; Sh#4).

### **Subcutaneous xenografts and drug treatment**

Rat1A or *Ink4A;Arf*<sup>-/-</sup> astrocytes ( $5 \times 10^5$ ) transduced with different lentiviral constructs were suspended in 150  $\mu$ l of PBS, together with 30  $\mu$ l of Matrigel (BD Biosciences), and injected

subcutaneously in the flank of athymic nude (Nu/Nu) mice (Charles River Laboratories, Wilmington, MA). For experiments with FGFR inhibitors, mice carrying ~200-300 mm<sup>3</sup> subcutaneous tumors derived from *Ink4A;Arf*<sup>-/-</sup> astrocytes were randomized to receive 50 mg/kg PD173074 in 0.05 M lactate buffer (pH 5) or an equal volume of lactate buffer by oral gavage. Treatment was administered for three cycles consisting of four consecutive days followed by two days of rest. Tumor diameters were measured with caliper, and tumor volumes estimated using the formula:  $0.5 \times \text{length} \times \text{width}^2$ . Data are expressed as mean $\pm$ SE. Mice were sacrificed when tumors in the control group reached the maximal size allowed by the IACUC Committee at Columbia University.

### **Orthotopic transplantation and drug treatment**

*Ink4A;Arf*<sup>-/-</sup> astrocytes carrying a luciferase expressing vector were transduced with FGFR3-TACC3 lentivirus.  $1 \times 10^3$  cells in 2  $\mu$ l of saline were injected in the caudate-putamen of 4-6 week old male athymic nude (Nu/Nu) mice using a stereotaxic frame (coordinates relative to bregma: 0.5 mm anterior; 1.1 mm lateral; 3.0 mm ventral) and a 26 gauge Hamilton syringe. Six days after injection, mice underwent bioluminescence imaging using a Xenogen CCD apparatus and were randomized to receive 50 mg/kg AZD4547 in 1% Tween 80 (treatment group) or DMSO in an equal volume of vehicle (control group) by oral gavage. AZD4547 was administered daily for two cycles of 10 days with a two day interval. Mice were monitored daily and sacrificed when neurological symptoms appeared. Kaplan-Meier survival curve was generated using the DNA Statview software package (AbacusConcepts, Berkeley, CA). Log-rank analysis was performed on the Kaplan-Meier



survival curve to determine statistical significance.

### **Intracranial injections of lentiviruses**

Intracranial injection of FGFR3-TACC3-shp53, EGFRvIII-shp53 or shp53 pTomo lentiviruses was performed in 4 week-old C57BL/6J mice in accordance with guidelines of IACUC Committee. Briefly, 1.8  $\mu$ l of purified lentiviral particles in PBS ( $1 \times 10^9$ /ml) were injected into the dentate gyrus using a stereotaxic frame (coordinates relative to bregma: 1.45 mm posterior; 1.65 mm lateral; 2.4 mm ventral) and a 26 gauge Hamilton syringe. Mice were monitored daily and sacrificed when neurological symptoms appeared. Mouse brain was analyzed histopathologically and by immunofluorescence.

### **Histology and immunostaining**

Tissue preparation and immunohistochemistry on brain tumors and immunofluorescence staining were performed as previously described (11-13). Antibodies and concentrations used in immunofluorescence staining are:

|                         |        |        |                |
|-------------------------|--------|--------|----------------|
| Anti-Ki67               | Rabbit | 1:1000 | Vector Labs    |
| Anti-pHH3               | Rabbit | 1:500  | Millipore      |
| Anti-FGFR3              | Mouse  | 1:1000 | Santa Cruz     |
| Anti-TACC3              | Goat   | 1:1000 | USBiological   |
| Anti- $\alpha$ -tubulin | Mouse  | 1:1000 | Sigma          |
| Anti-Nestin             | Mouse  | 1:1000 | BD Pharmingen  |
| Anti-Olig2              | Rabbit | 1:200  | IBL            |
| Anti-GFAP               | Rabbit | 1:200  | Dako           |
| Anti-ERK                | Rabbit | 1:1000 | Cell Signaling |
| Anti-pERK               | Rabbit | 1:1000 | Cell Signaling |
| Anti-FRS                | Rabbit | 1:250  | Santa Cruz     |
| Anti-pFRS               | Rabbit | 1:1000 | Cell Signaling |
| Anti-AKT                | Rabbit | 1:1000 | Cell Signaling |
| Anti-pAKT473            | Rabbit | 1:1000 | Cell Signaling |

### **Immunofluorescence and live-cell microscopy.**

Immunofluorescence microscopy was performed on cells fixed with 4% para-formaldehyde (PFA) in PHEM (60 mM PIPES, 27 mM HEPES, 10 mM EGTA, 4 mM MgSO<sub>4</sub>, pH 7.0). Cells were permeabilized using 1% Triton X 100. Mitotic spindles were visualized by anti- $\alpha$ -tubulin antibodies (Sigma). Secondary antibodies conjugated to Alexa Fluor-488/-594 (Molecular Probes) were used. All staining with multiple antibodies were performed in a sequential manner. DNA was stained by DAPI (Sigma). Fluorescence microscopy was performed on a Nikon A1R MP microscope. Images were recorded with a Z-optical spacing of 0.25  $\mu$ m and analyzed using ImageJ software (National Institute of Health). For live-cell analyses, Rat1A cells infected with pLNCX-H2B retrovirus and transduced with lentiviral vector or FGFR3-TACC3 fusion were seeded in glass bottom dishes in phenol red free DMEM and followed by time-lapse microscopy using the Nikon A1R MP biostation at 37°C and 5% CO<sub>2</sub>/95% air. Images with a Z-optical spacing of 1  $\mu$ m were recorded every 4 min for 8 h. Images of unchallenged mitosis from early prophase until cytokinesis were further processed using ImageJ software. The time-point of nuclear envelope breakdown (NEB) was defined as the first frame showing loss of smooth appearance of chromatin and anaphase was the first frame when chromosome movement towards the poles became apparent. Nuclear envelope reconstitution (NER) was defined as the first frame showing nuclei decondensation. Box and whisker plots were calculated from image sequences from at least 50 recorded cells. Statistical analysis was performed using StatView software (AbacusConcepts, Berkeley, CA). Two-tailed unpaired t-tests with Welch's correction were performed for comparison of means analysis.

## Supplementary References

1. H. Li, R. Durbin, Fast and accurate short read alignment with Burrows-Wheeler transform. *Bioinformatics* **25**, 1754 (2009).
2. A. J. Vilella *et al.*, EnsemblCompara GeneTrees: Complete, duplication-aware phylogenetic trees in vertebrates. *Genome Res.* **19**, 327 (2009).
3. R. L. Seal, S. M. Gordon, M. J. Lush, M. W. Wright, E. A. Bruford, genenames.org: the HGNC resources in 2011. *Nucleic Acids Res.* **39**, D514 (2011).
4. S. A. Tomlins *et al.*, Recurrent fusion of TMPRSS2 and ETS transcription factor genes in prostate cancer. *Science* **310**, 644 (2005).
5. X. S. Wang *et al.*, An integrative approach to reveal driver gene fusions from paired-end sequencing data in cancer. *Nat. Biotechnol.* **27**, 1005 (2009).
6. Comprehensive genomic characterization defines human glioblastoma genes and core pathways. *Nature* **455**, 1061 (2008).
7. R: A Language and Environment for Statistical Computing. R Development Core Team (2011).
8. B. Iglewicz, D. C. Hoaglin, *How to detect and handle outliers*. (ASQC, Milwaukee, Wis., 1993).
9. K. Wang *et al.*, PennCNV: an integrated hidden Markov model designed for high-resolution copy number variation detection in whole-genome SNP genotyping data. *Genome Res.* **17**, 1665 (2007).
10. S. Morganella, L. Cerulo, G. Viglietto, M. Ceccarelli, VEGA: variational segmentation for copy number detection. *Bioinformatics* **26**, 3020 (2010).

11. M. S. Carro *et al.*, The transcriptional network for mesenchymal transformation of brain tumours. *Nature* **463**, 318 (2010).
12. X. Zhao *et al.*, The HECT-domain ubiquitin ligase Huwe1 controls neural differentiation and proliferation by destabilizing the N-Myc oncoprotein. *Nat. Cell Biol.* **10**, 643 (2008).
13. X. Zhao *et al.*, The N-Myc-DLL3 cascade is suppressed by the ubiquitin ligase Huwe1 to inhibit proliferation and promote neurogenesis in the developing brain. *Dev. Cell* **17**, 210 (2009).

## Supplementary Figure Legends

### Fig. S1

Identification and validation of gene fusions in GBM. **(A)** TX-Fuse pipeline for the identification of fusion transcripts from RNA-Seq data. **(B)** RT-PCR for *POLR2A-WRAP53* (left panel). Sanger sequencing chromatograms show the reading frames at the breakpoint and putative translation of the fusion proteins in the positive sample (right panel). **(C)** RT-PCR for *CAPZB-UBR4* (left panel). Sanger sequencing chromatograms show the reading frames at the breakpoint and putative translation of the fusion proteins in the positive sample (right panel). **(D)** RT-PCR for *ST8SIA4-PAM* (left panel). Sanger sequencing chromatograms show the reading frames at the breakpoint and putative translation of the fusion proteins in the positive sample (right panel). **(E)** RT-PCR for *PIGU-NCOA6* (right panel). Sanger sequencing chromatograms show the reading frames at the breakpoint and putative translation of the fusion proteins in the positive sample (right panel).

### Fig. S2

Analysis and validation of the expression of *FGFR3-TACC3* fused transcripts in GSCs and GBM samples. **(A)** Amino acid sequence of the FGFR3-TACC3 protein in GSC-1123. Residues corresponding to FGFR3 and TACC3 are shown in red and blue, respectively. The fusion protein joins the TK domain of FGFR3 to the TACC domain of TACC3. **(B)** Expression measured by read depth from RNA-seq data. Grey arcs indicate predicted components of transcripts fused together. Overall read depth (blue) and split insert depth (red) are depicted in

the graph, with a 50-read increment and a maximum range of 1800 reads. Note the very high level of expression in the regions of the genes implicated in the fusion events, particularly for *FGFR3-TACC3*. **(C)** qRT-PCR shows very high expression of *FGFR3* and *TACC3* mRNA sequences included in the *FGFR3-TACC3* fusion transcript in GSC-1123. **(D)** Western blot analysis with a monoclonal antibody, which recognizes the N-terminal region of human FGFR3, shows expression of a ~150 kD protein in GSC-1123 but not in GSC-0331 and GSC-0114 that lack the *FGFR3-TACC3* rearrangement. **(E)** Immunostaining analysis with the FGFR3 antibody of the GBM-1123 (upper panels) and a GBM sample lacking the *FGFR3-TACC3* rearrangement (lower panels). FGFR3 (red), DNA (DAPI, blue). The pictures were taken at low (left) and high (right) magnification. **(F)** MS/MS analysis of ~150 kD fusion protein immunoprecipitated by the monoclonal anti-FGFR3 antibody from GSC-1123 identifies three unique peptides mapping to the FGFR3 (upper panels) and three peptides mapping to the C-terminal region of TACC3 (lower panels).

### **Fig. S3**

Analysis of expression and CNV for the *FGFR3* and *TACC3* genes in TCGA derived GBM samples. **(A)** Co-outlier expression of *FGFR3* and *TACC3* in four GBM harboring *FGFR3-TACC3* gene fusions. **(B)** CNV analysis showing micro-amplifications of the rearranged portions of the *FGFR3* and *TACC3* genes in all four GBM samples harboring *FGFR3-TACC3* gene fusions. **(C)** Exome-Fuse pipeline for the identification of gene fusion rearrangements from DNA exome sequences.

#### Fig. S4

*FGFR-TACC* gene fusions identified by exome sequencing analysis. **(A)** Split-reads aligning to the genomic breakpoints of *FGFR3* and *TACC3* genes in four TCGA-GBM samples carrying gene fusions between *FGFR3* and *TACC3* genes. **(B-C)** *FGFR3-TACC3*-specific RT-PCR (left panel). Sanger sequencing chromatograms showing the reading frame at the breakpoint and putative translation of the fusion protein in the positive sample (right panel). **(D)** *FGFR1-TACC1*-specific RT-PCR from GBM samples (left panel). Sanger sequencing chromatograms showing the reading frame at the breakpoint and putative translation of the fusion protein in the positive samples (right panel). **(E)** *FGFR3-TACC3*-specific RT-PCR (left panel). Sanger sequencing chromatograms showing the reading frame at the breakpoint and putative translation of the fusion protein in the positive samples (right panel).

#### Fig. S5

Analysis of *FGFR3-TACC3* fusion protein in cell lines and tumors **(A)** Rat1A cells transduced with control lentivirus or lentivirus expressing *FGFR3*, *TACC3* or *FGFR3-TACC3* were analyzed by Western blot with an antibody recognizing the N-terminus of *FGFR3* (included in the *FGFR3-TACC3* fusion protein) or the N-terminus of *TACC3* (not included in the *FGFR3-TACC3* fusion protein). **(B)** Quantitative Western blot of endogenous *FGFR3-TACC3* in GSC-1123 compared with lentivirally expressed *FGFR3-TACC3* in Rat1A. **(C)** Quantitative Western blot of ectopic *FGFR3-TACC3* fusion protein in mouse *Ink4A;Arf*<sup>-/-</sup> astrocytes and mouse GBM (mGBM-15 and mGBM-17) compared with the endogenous expression in GSC-1123. **(D)** Western blot analysis of *FGFR3-TACC3* and *FGFR3-TACC3-K508M* in Rat1A. **(E)** Subcutaneous tumors are

generated by *Ink4A;Arf*<sup>-/-</sup> astrocytes expressing FGFR-TACC fusions. Immunostaining of tumors from mice injected with *Ink4A;Arf*<sup>-/-</sup> astrocytes expressing FGFR3-TACC3 shows positivity for glioma-specific (Nestin, Olig2 and GFAP) and proliferation (Ki67 and pHH3) markers. **(F)** FGFR3 immunostaining of GBM-1123, GSC-1123, mouse GBM induced by FGFR3-TACC3 expressing lentivirus and subcutaneous xenograft of mouse astrocytes transformed by FGFR3-TACC3 fusion. FGFR3-TACC3, red; DNA (DAPI), blue. **(G)** Quantification of FGFR3-TACC3 positive cells in the tumors and cultures of cells shown in panel F.  $\alpha$ -tubulin or  $\beta$ -actin are shown as control for loading. F3-T3: FGFR3-TACC3; F3-T3-K508M: FGFR3-TACC3-K508M.

### **Fig. S6**

Analysis of FGFR signaling by FGFR3-TACC3 fusion protein. **(A-C)** *Ink4A;Arf*<sup>-/-</sup> mouse astrocytes transduced with different constructs were starved of mitogens and left untreated or treated with **(A)** FGF-2 (50 ng/ml) for the indicated times, **(B)** FGF-1 for 10 min at the indicated concentrations and **(C)** FGF-8 for 10 min at the indicated concentrations. Phospho-proteins and total proteins were analyzed by Western blot.  $\beta$ -actin and  $\alpha$ -tubulin are shown as a control for loading. **(D)** Constitutive auto-phosphorylation of FGFR3-TACC3 fusion. Human astrocytes transduced with empty lentivirus or a lentivirus expressing FGFR3-TACC3 or FGFR3-TACC3-K508M were left untreated (0) or treated with 100 nM of the FGFR TK inhibitor PD173074 for the indicated times. Phospho-proteins and total proteins were analyzed by Western blot using the indicated antibodies. **(E)** Mouse GSCs derived from FGFR3-TACC3 or RasV12 induced glioma were left untreated (0) or treated with 100 nM of PD173074 for the indicated times.



Phospho-proteins and total proteins were analyzed by Western blot using the indicated antibodies. F3-T3: FGFR3-TACC3; F3-T3-K508M: FGFR3-TACC3-K508M.

### **Fig. S7**

Z-stacked confocal images of the representative FGFR3-TACC3 expressing *Ink4A;Arf*<sup>-/-</sup> mouse astrocyte shown as a maximum intensity projection in Figure 3A. Cells were immunostained using FGFR3 (red) and  $\alpha$ -tubulin (green). DNA was counterstained with DAPI (blue). Images were acquired at 0.250  $\mu$ m intervals. Coordinates of the image series are indicated.

### **Fig. S8**

Localization of FGFR3, TACC3 and FGFR3-TACC3 fusion in mitotic cells. **(A)** Maximum intensity projection confocal image of a representative FGFR3-TACC3 expressing *Ink4A;Arf*<sup>-/-</sup> mouse astrocyte at metaphase, immunostained using the FGFR3 antibody (red). FGFR3-TACC3 displays asymmetric localization on top of one spindle pole. **(B)** In telophase FGFR3-TACC3 localizes to the mid-body. **(C)** Maximum intensity projection confocal image of a representative TACC3 expressing *Ink4A;Arf*<sup>-/-</sup> mouse astrocyte at metaphase immunostained with the TACC3 antibody (red). TACC3 staining coincides with the spindle microtubules. **(D)** Maximum intensity projection confocal image of a representative FGFR3 expressing *Ink4A;Arf*<sup>-/-</sup> mouse astrocyte at metaphase immunostained with the FGFR3 antibody (red). FGFR3 does not show a distinct staining pattern in mitosis. Cells were co-immunostained using  $\alpha$ -tubulin (green) to visualize the mitotic spindle. DNA was counterstained with DAPI (blue). Images were

acquired at 0.250  $\mu\text{m}$  intervals. Endogenous levels of FGFR3 or TACC3 were undetectable under the applied experimental conditions. F3-T3: FGFR3-TACC3.

### Fig. S9

FGFR3-TACC3 expression induces chromosome missegregation, chromatid cohesion defects, aneuploidy and defective spindle checkpoint. **(A)** Representative microphotographs of metaphase spreads from *Ink4A;Arf*<sup>-/-</sup> astrocytes expressing the empty vector or FGFR3-TACC3 fusion. Arrows indicate chromosome misalignments, lagging chromosomes and chromosome bridges. **(B)** Representative metaphase spreads show premature sister chromatid separation (PMSCS) in *Ink4A;Arf*<sup>-/-</sup> astrocytes expressing FGFR3-TACC3 (left panel). The number of mitosis with PMSCS was scored in at least 100 metaphases for each condition in three independent experiments (right panel). Data are presented as the means $\pm$ standard deviation, (n=3). **(C)** Representative metaphase spreads show PMSCS in Rat1A cells expressing FGFR3-TACC3 fusion (left panel); the number of mitosis with PMSCS was scored in triplicate samples (right panel). Data are presented as the means $\pm$ standard deviation, (n=3). **(D)** Nocodazole was added for the indicated times to Rat1A-H2B-GFP cells transduced with the specified lentiviruses. The mitotic index at each time point was determined by scoring the number of H2B-GFP-positive cells in mitosis at each time point. Data are presented as means $\pm$ standard deviation, (n=3). **(E)** Karyotype analysis of Rat1A cells transduced with control, FGFR3, TACC3 or FGFR3-TACC3 expressing lentiviruses. Distribution of chromosome counts of cells arrested in mitosis and analyzed using DAPI. Chromosomes were counted in 100 metaphase cells for each condition to determine the ploidy and the diversity of chromosome counts within the cell

population. **(F)** Representative karyotypes of primary human astrocytes transduced with control or FGFR3-TACC3 expressing lentivirus. F3-T3: FGFR3-TACC3.

### **Fig. S10**

Analysis of FGFR3-TACC3 fusion mediated growth alteration and specificity of FGFR TK inhibitor effects on cells carrying FGFR-TACC fusions. **(A)** Decreased proliferation is an early effect of FGFR3-TACC3 expression in human primary astrocytes (7 days after infection, passage 1). Values are the means $\pm$ standard deviation, (n=4). **(B)** Enhanced proliferation rate of human primary astrocytes transduced with lentivirus expressing FGFR3-TACC3 fusion six weeks after infection (passage 10). Values are the means $\pm$ standard deviation, (n=4). **(C-D)** Cell growth as determined by MTT assay for Rat1A cells transduced with the specified lentiviruses and subsequently treated for three days with vehicle or BGJ398 **(C)** or AZD4547 **(D)** at the indicated concentration. Values are the means $\pm$ standard error of the ratio between inhibitor treated and vehicle treated cells, (n=4). **(E)** Rat1A cells expressing FGFR3-TACC3 fusion were transduced with lentivirus expressing a non-targeting shRNA (sh-Ctr) or shRNA sequences targeting FGFR3. Five days after infection, cell lysates were assayed by Western blot (left panel). The proliferation rate of parallel cultures was analyzed by the MTT assay at the indicated times. Infection with lentivirus expressing the most efficient FGFR3 silencing sequences (sh-3 and sh-4), reverted the growth of FGFR3-TACC3 expressing cultures to a rate comparable to that of Rat1A transduced with empty vector (right panel). Values are the means $\pm$ standard deviation, (n=4). **(F)** GSC-1123 cells were transduced with lentivirus expressing a non-targeting shRNA (sh-Ctr) or lentivirus expressing sh-3 and sh-4 sequences

targeting FGFR3. Western Blot analysis was performed using the FGFR3 antibody to detect FGFR3-TACC3 fusion protein (left panel). Parallel cultures of GSC-1123 cells were transduced in triplicate. Five days after infection cells were plated at density of  $2 \times 10^4$  cells/well in triplicate and the number of trypan blue excluding cells was scored at the indicated times (right panel). Values are the means  $\pm$  standard deviation, (n=3). **(G)** The FGFR TK inhibitor PD173074 suppresses tumor growth of subcutaneous tumors generated by *Ink4A;Arf*<sup>-/-</sup> astrocytes expressing FGFR3-TACC3. After tumor establishment (200-300 mm<sup>3</sup>, arrow) mice were treated with vehicle or PD173074 (50 mg/kg) for 14 days. Values are mean tumor volumes  $\pm$  standard error, (n=7 mice per group).

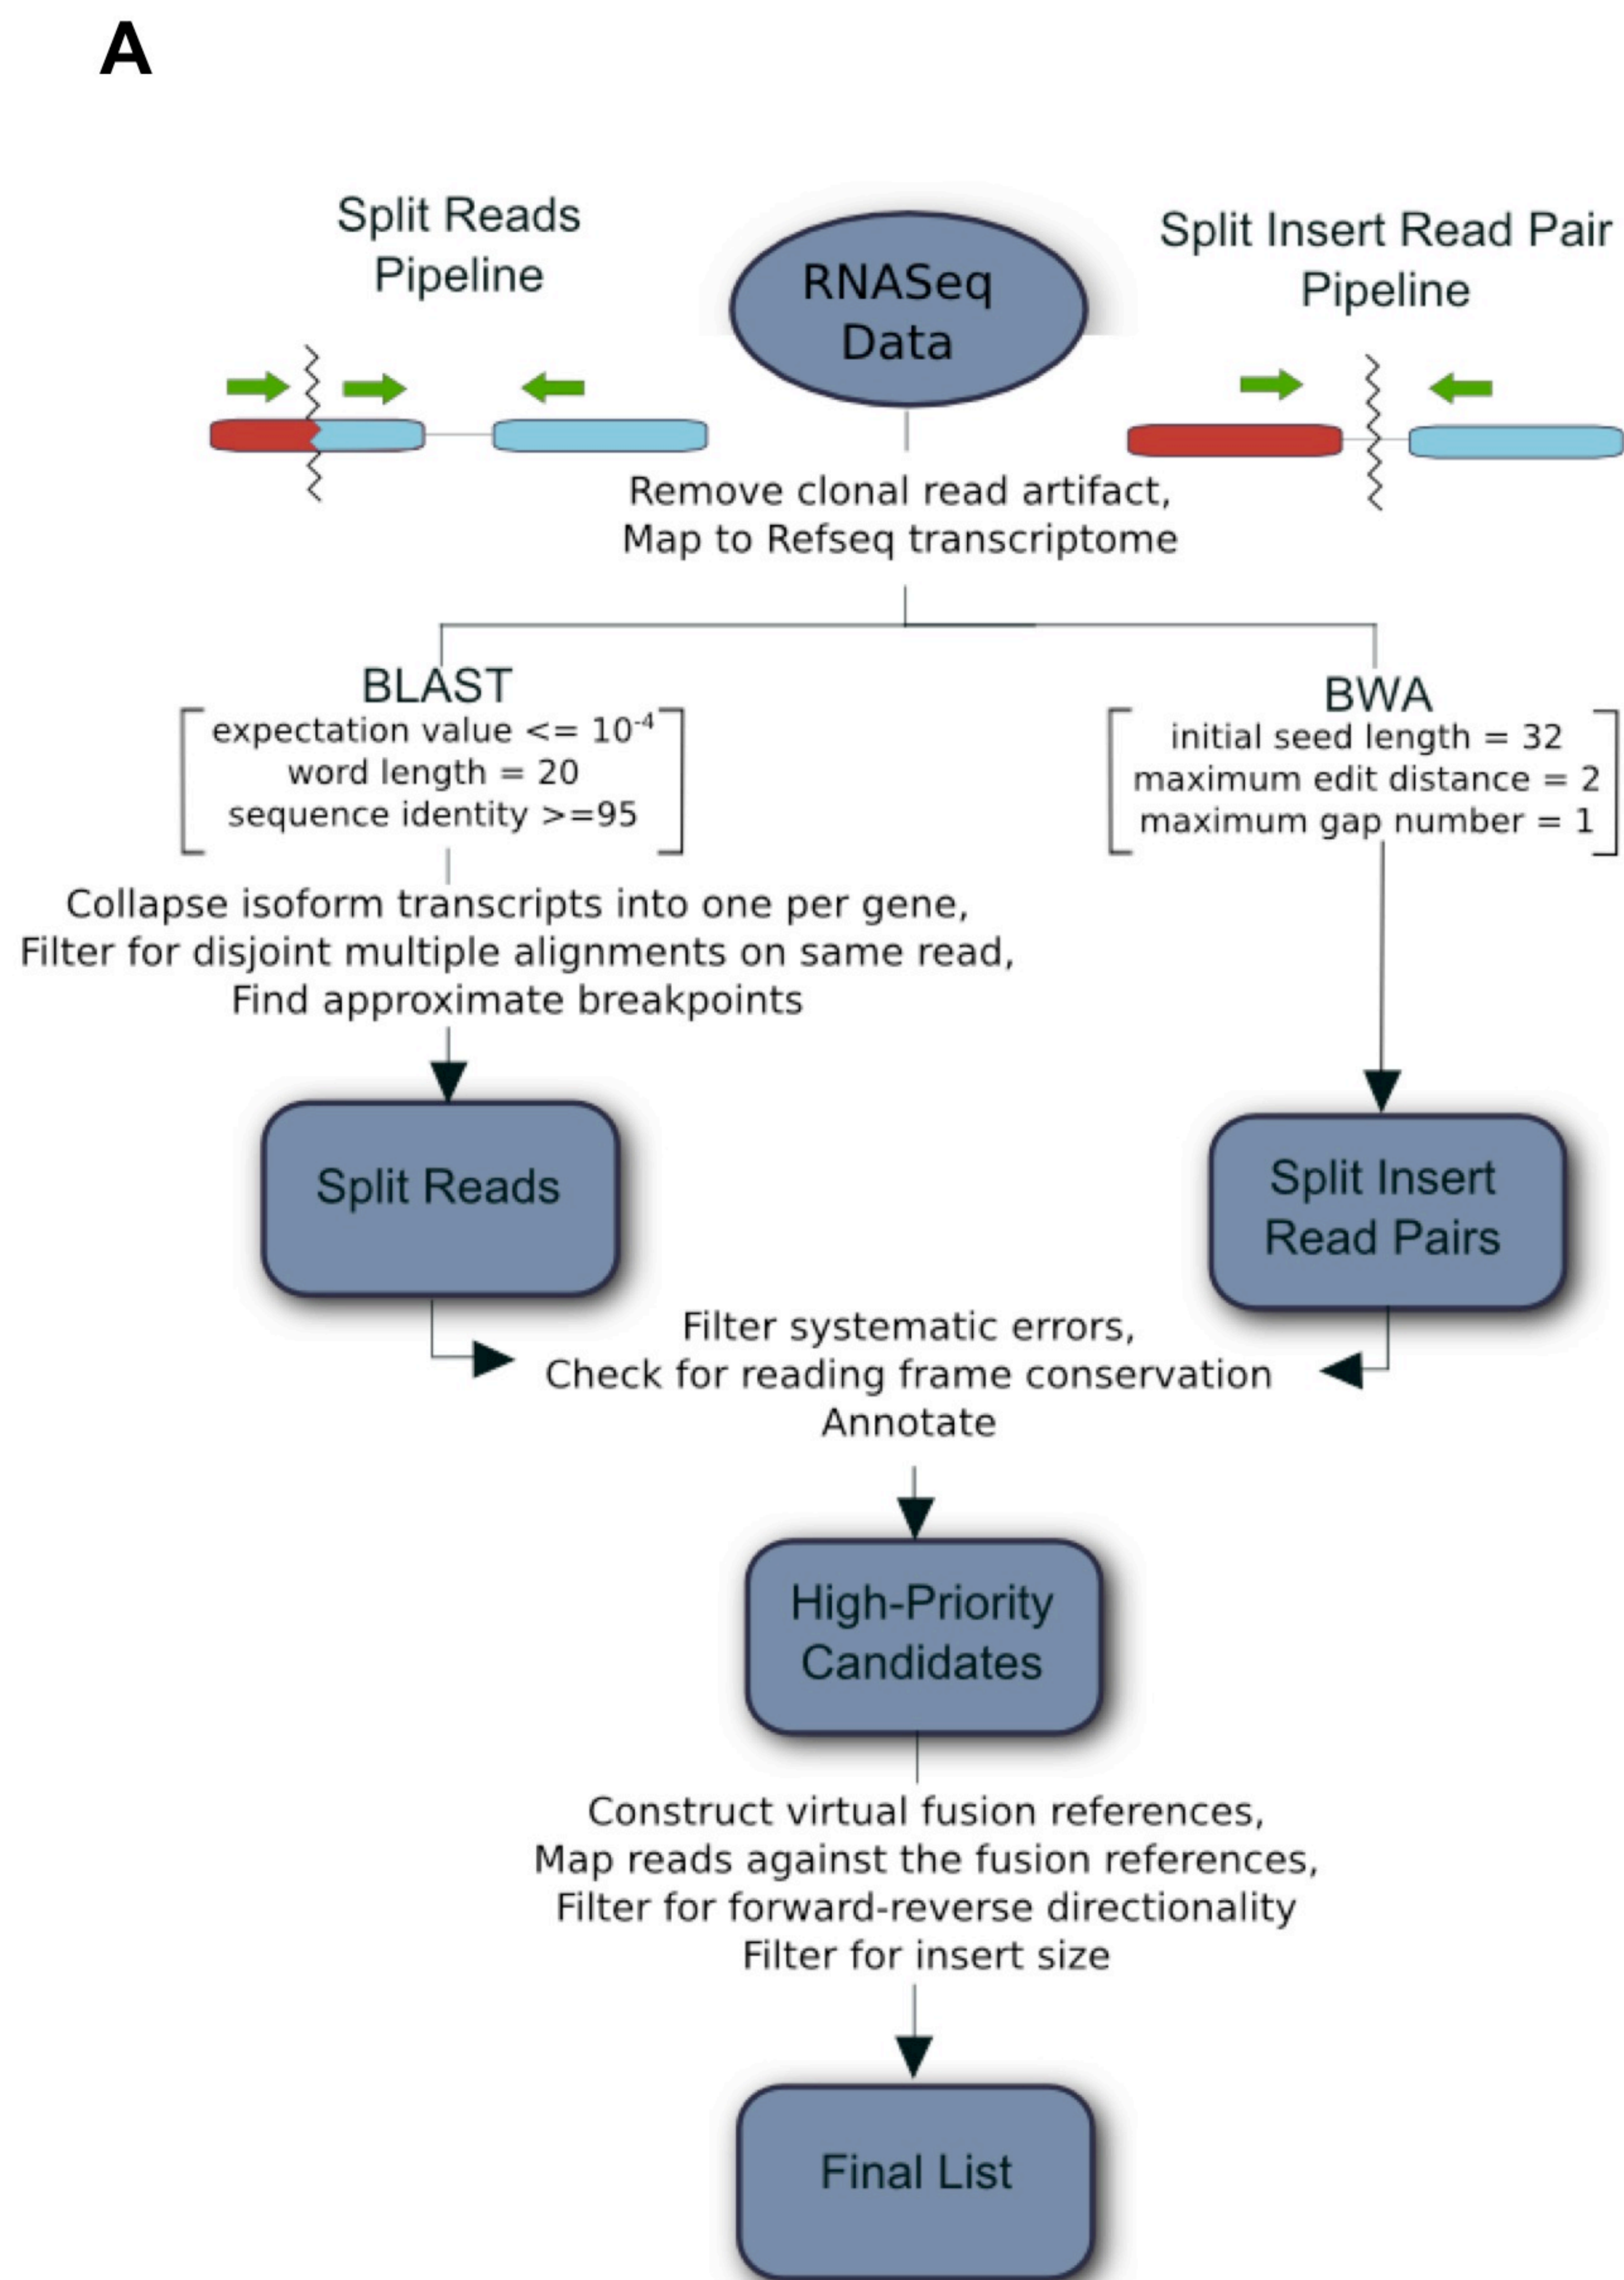

**B** POLR2A-WRAP53 GSC-0114

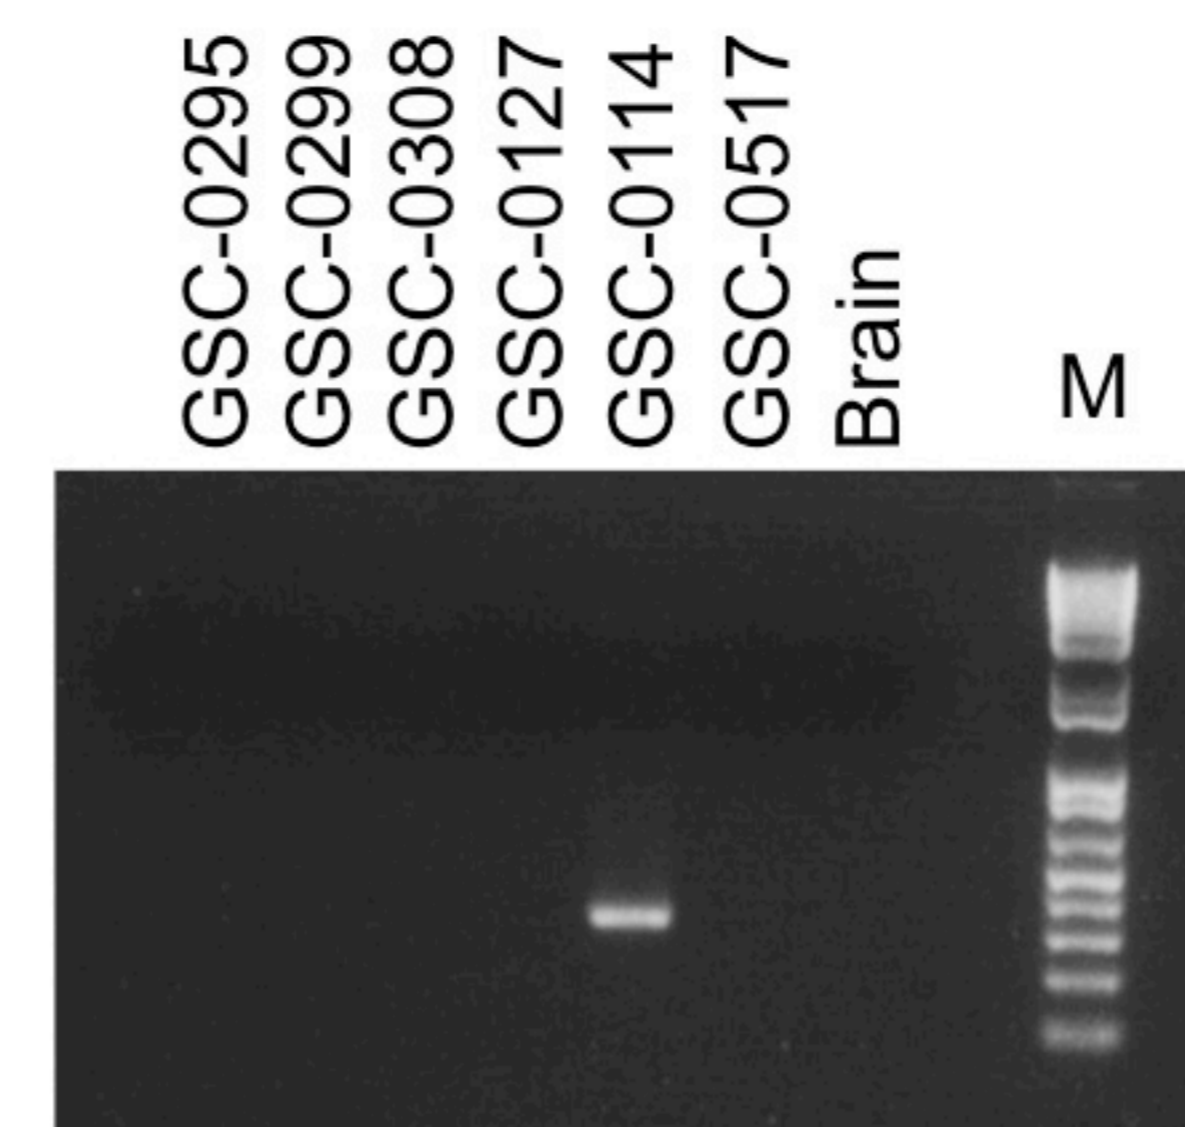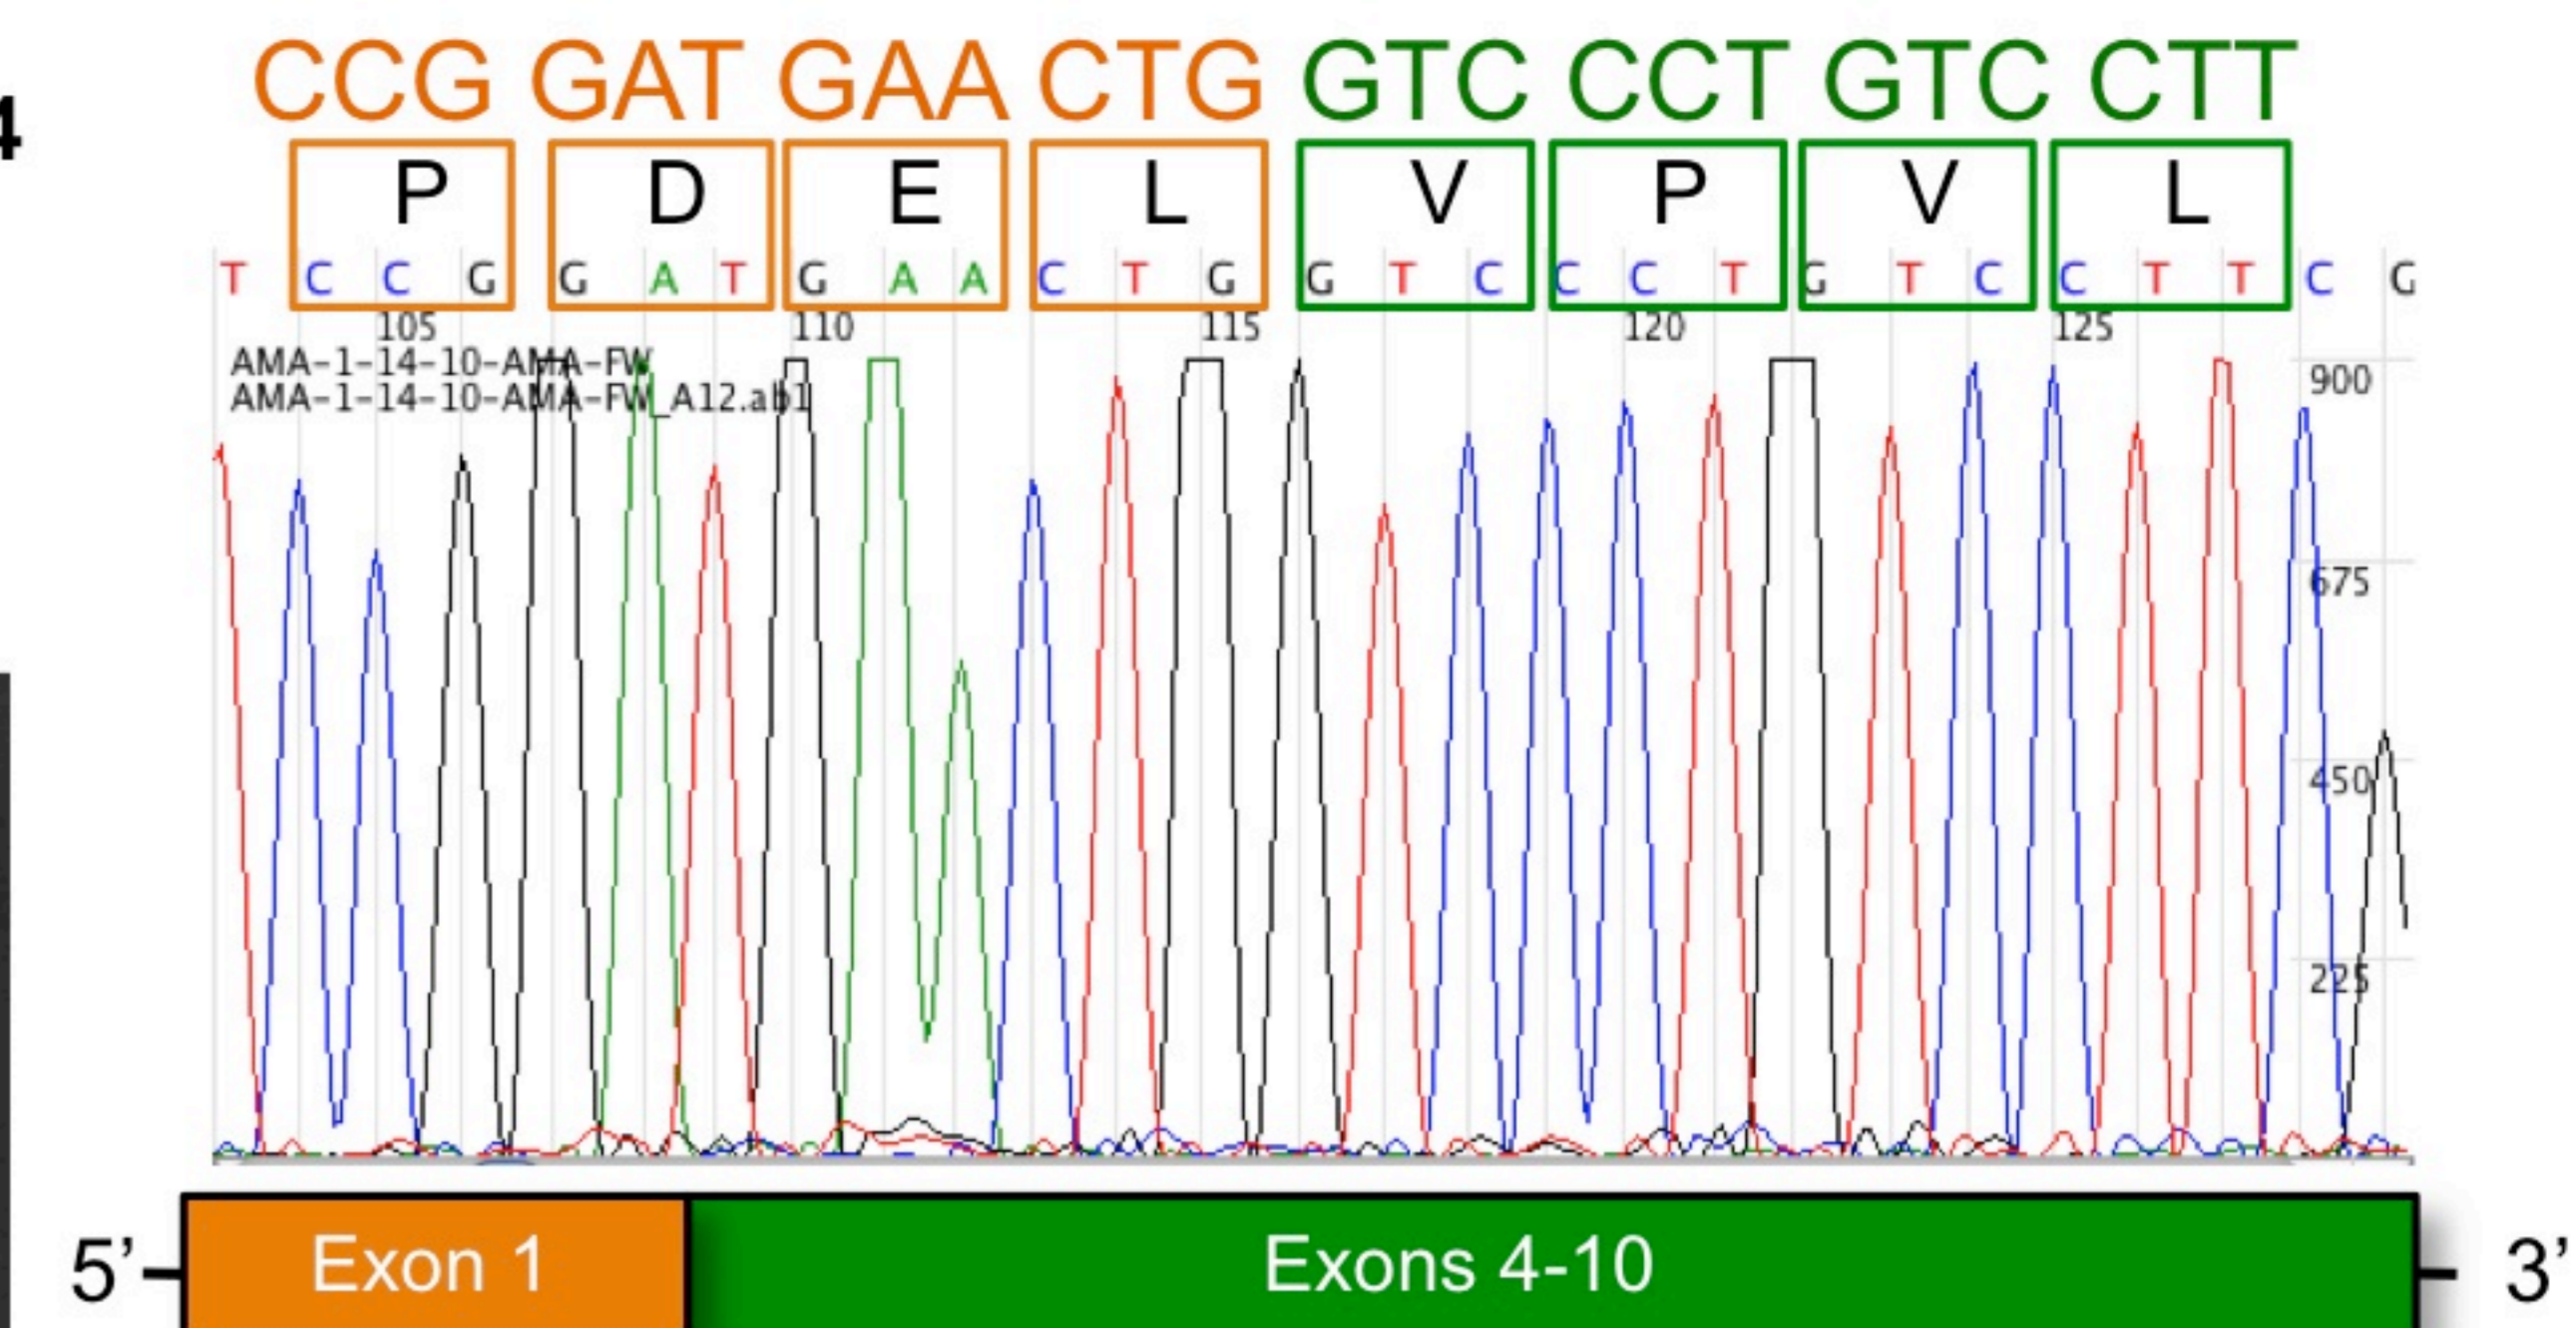

**C** CAPZB-UBR4 GSC-0114

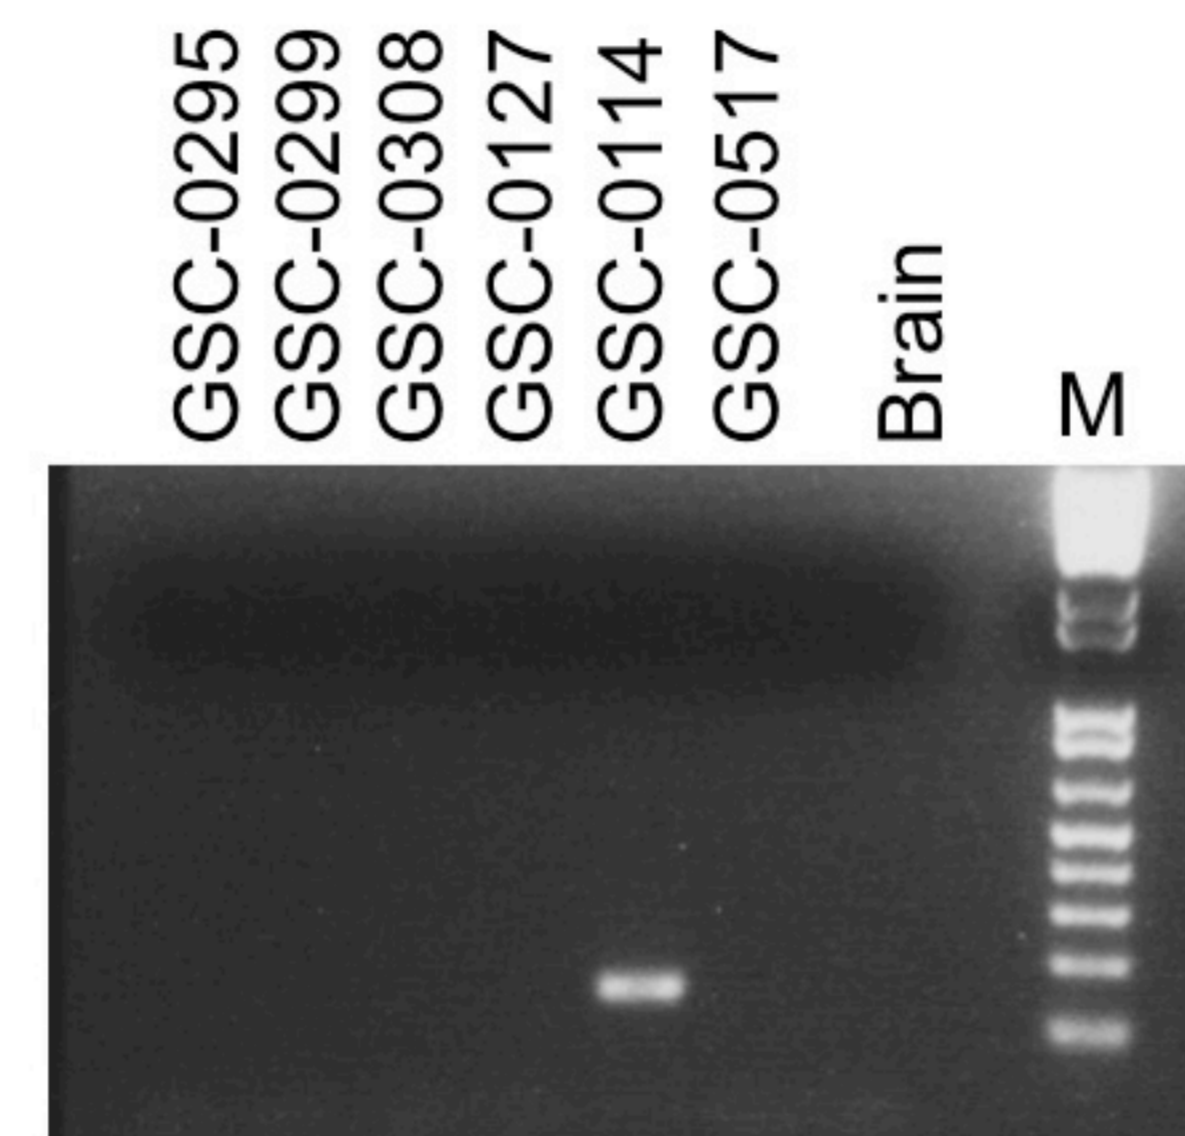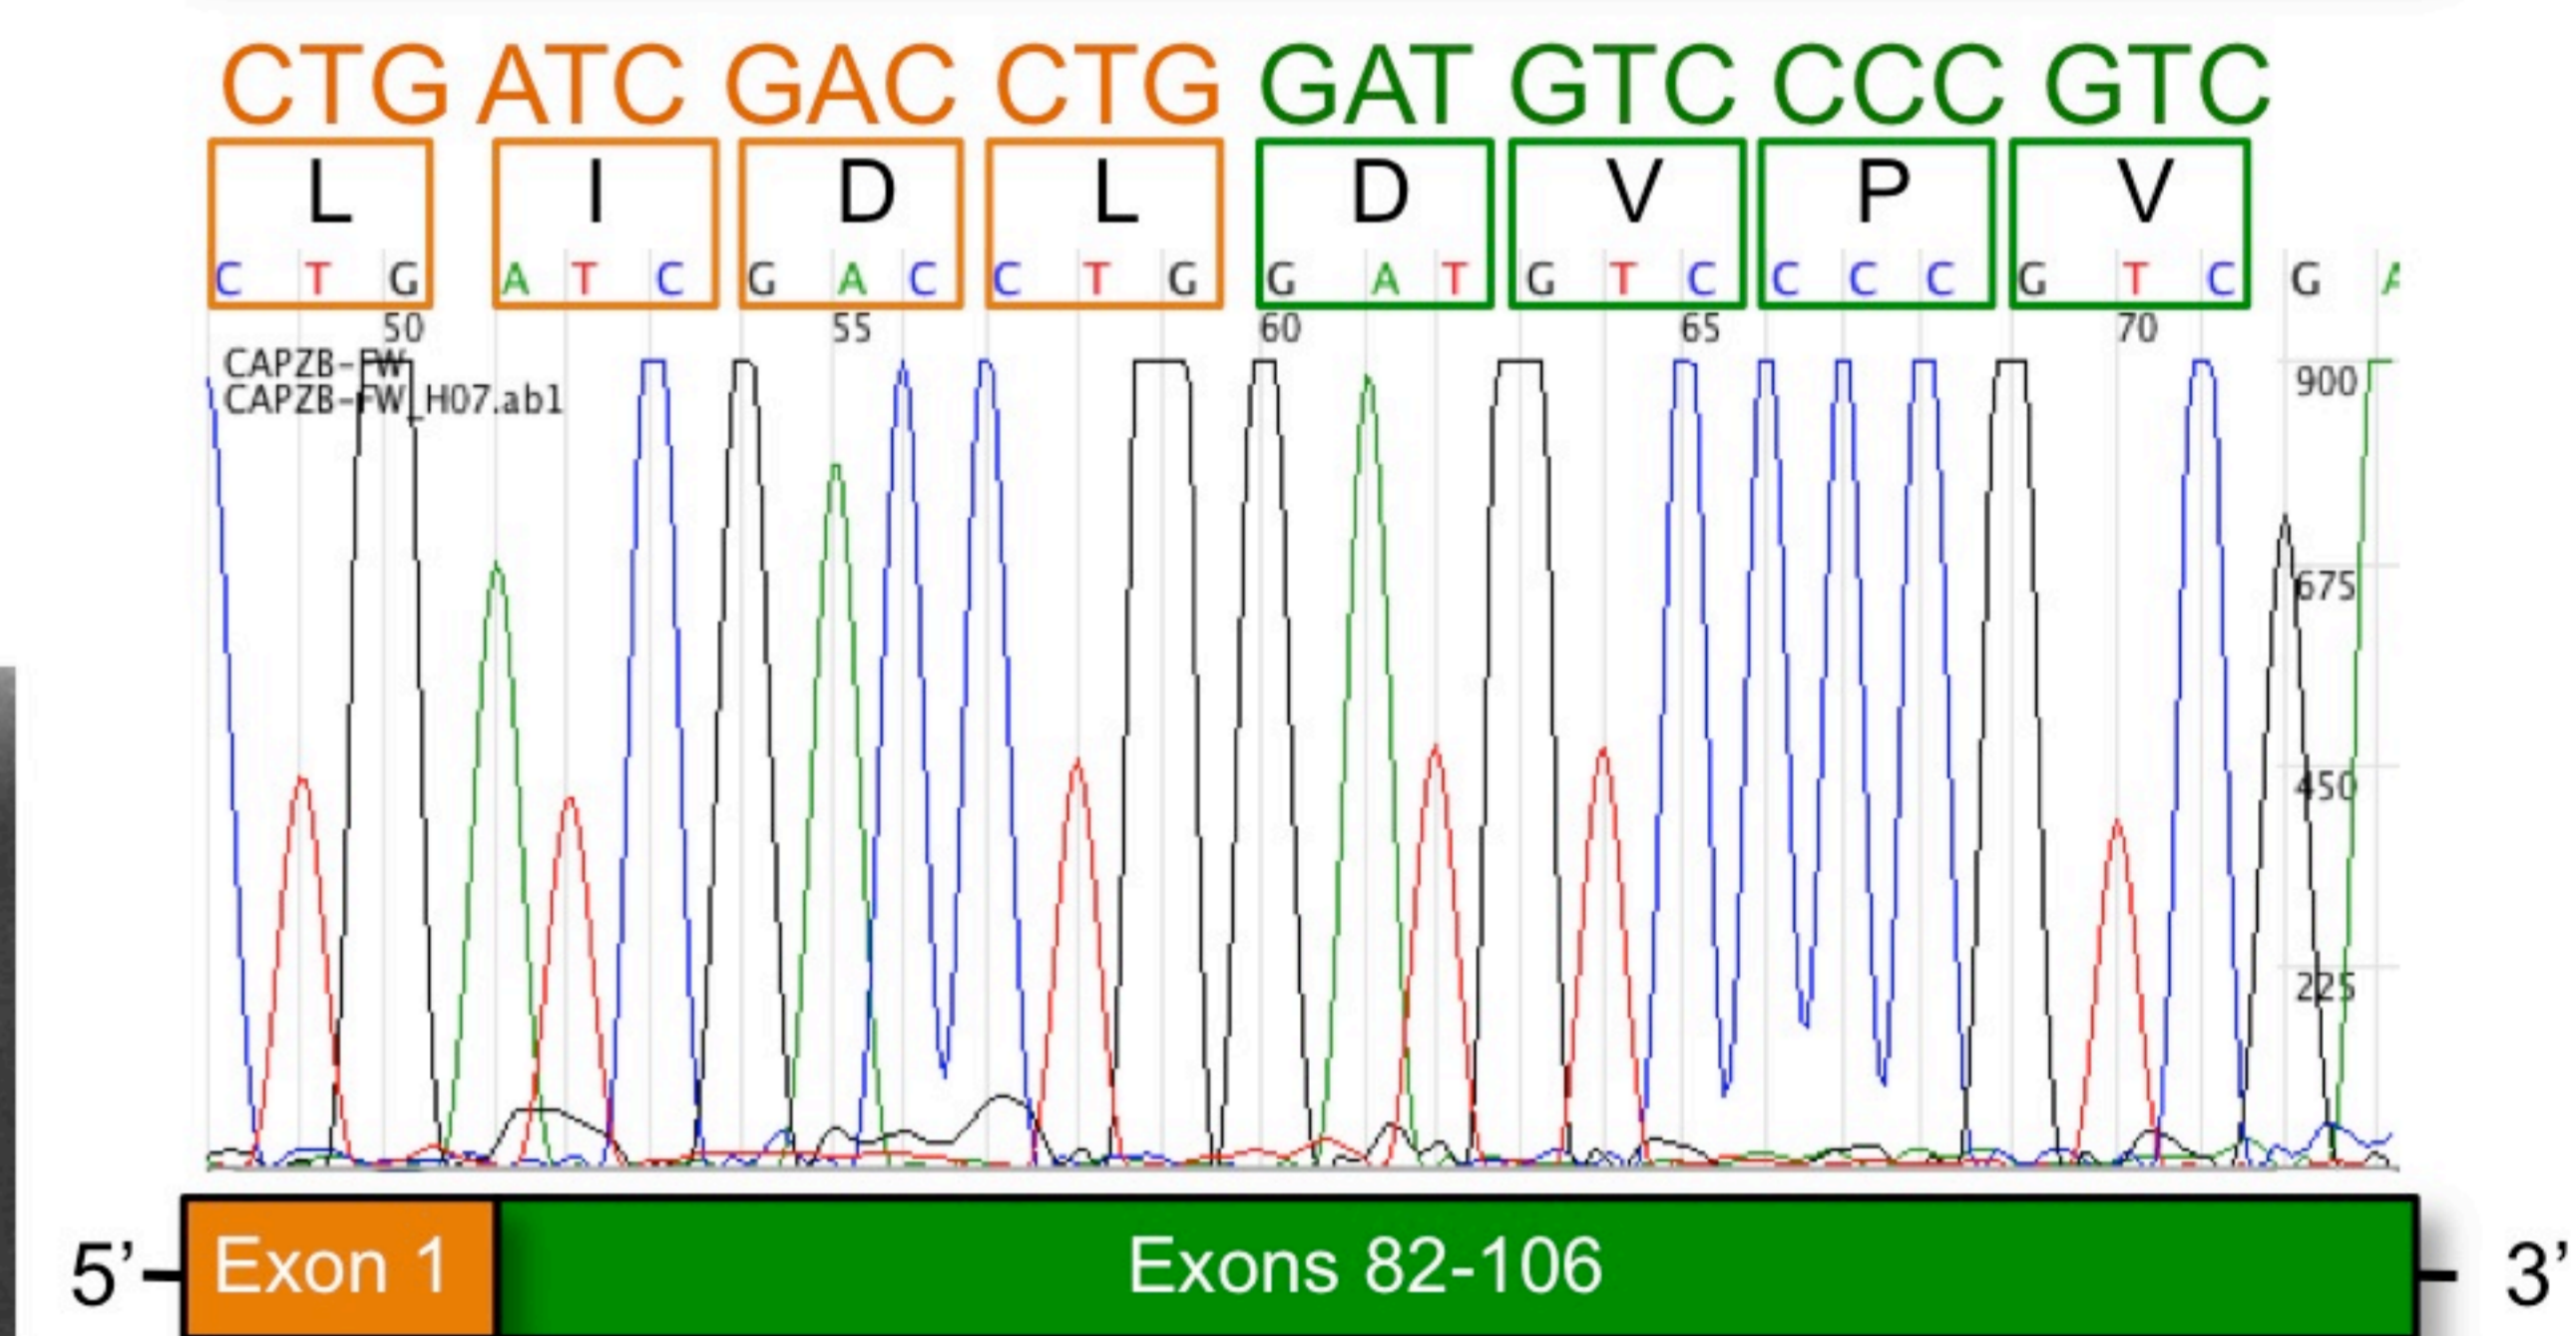

**D** ST8SIA4-PAM GSC-0517

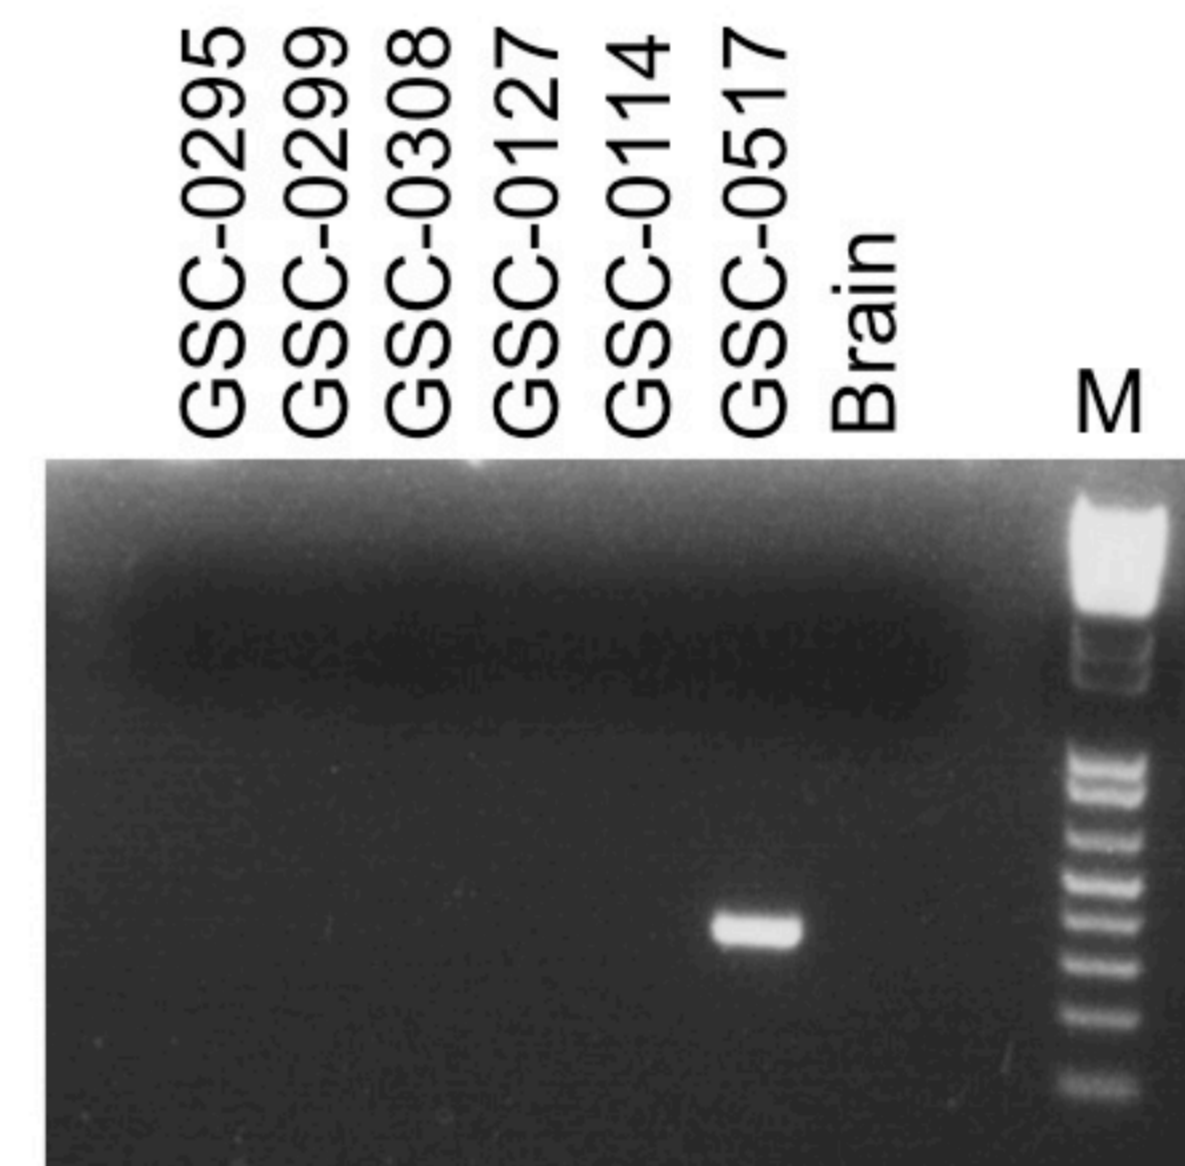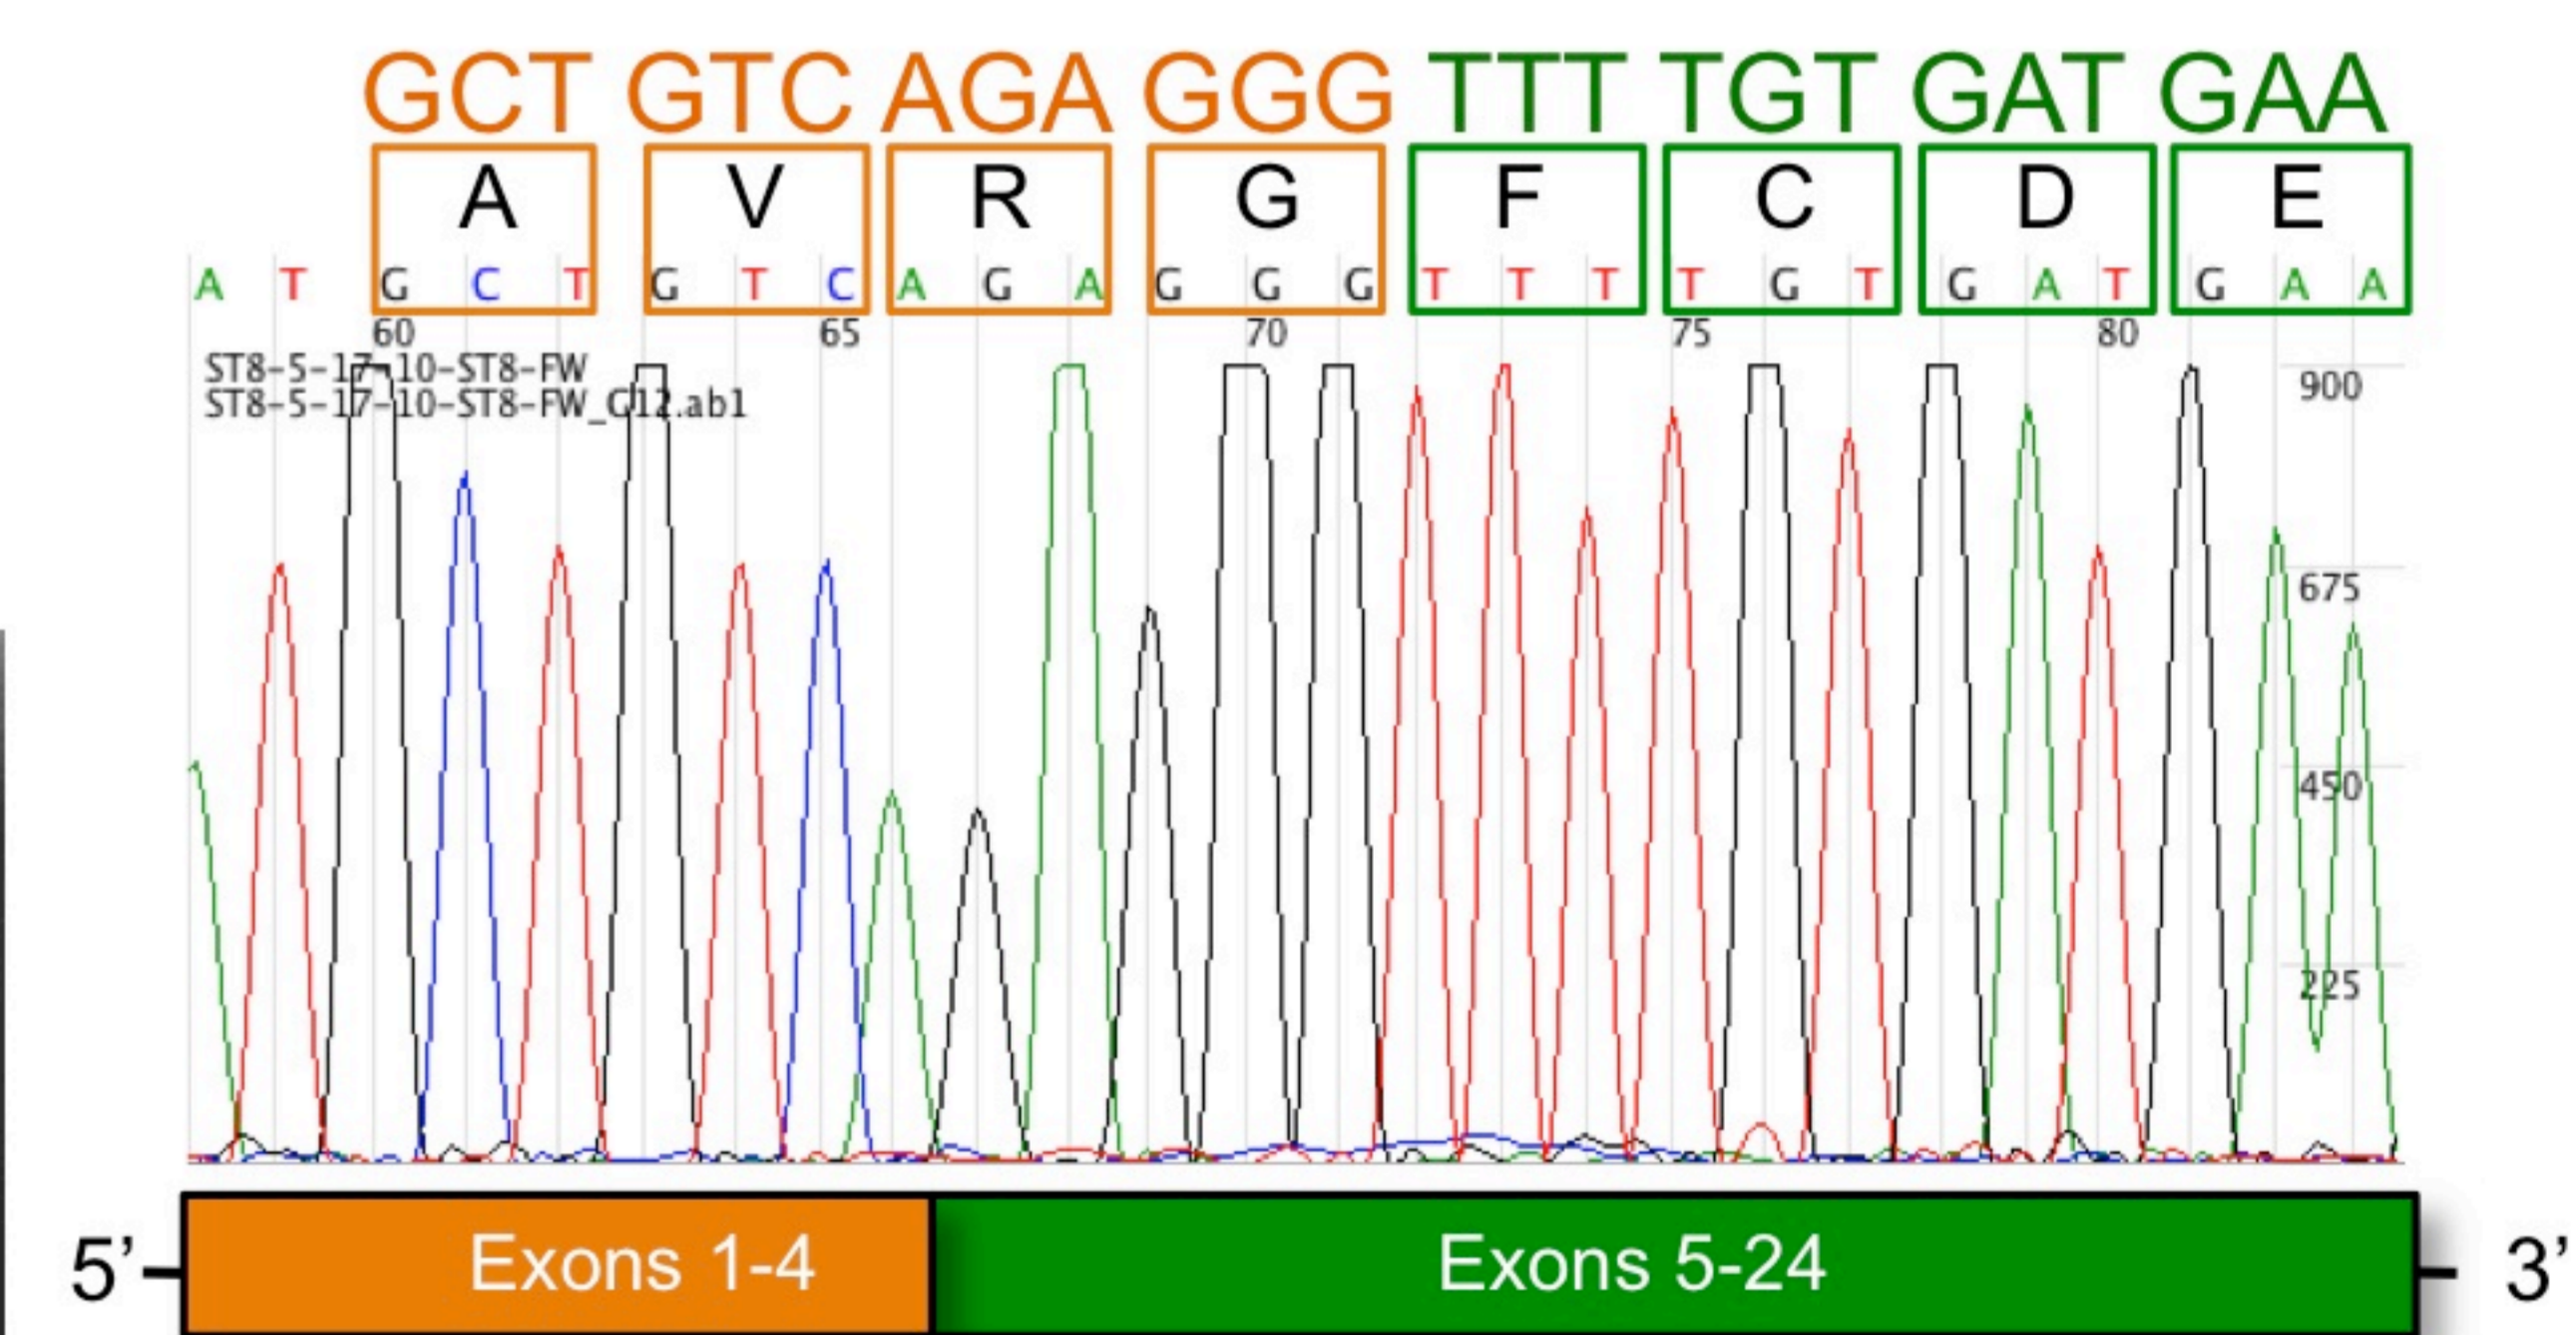

**E** FIGU-NCOA6 GSC-0308

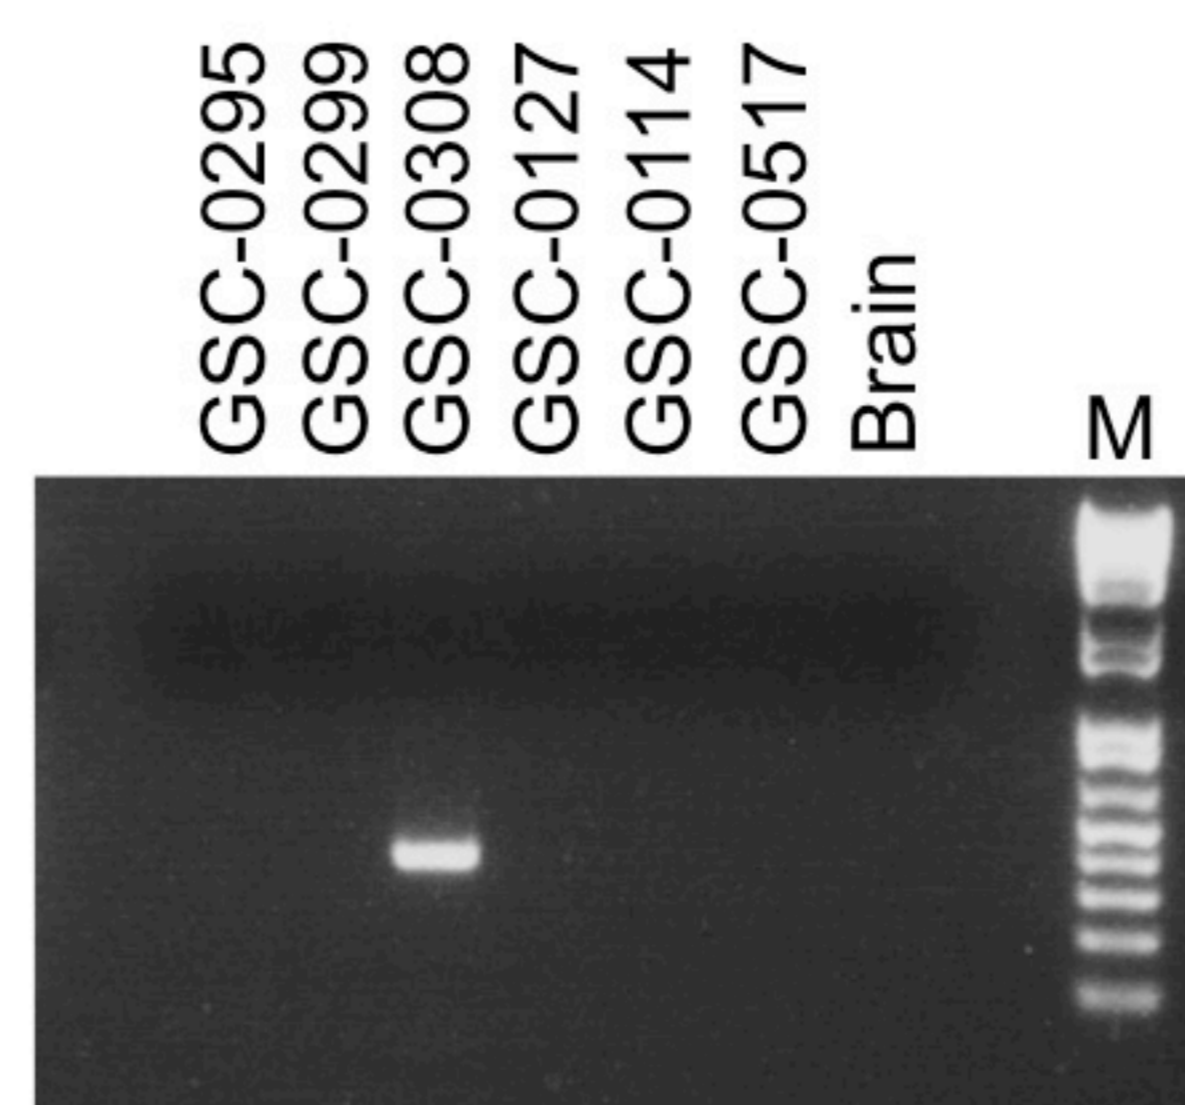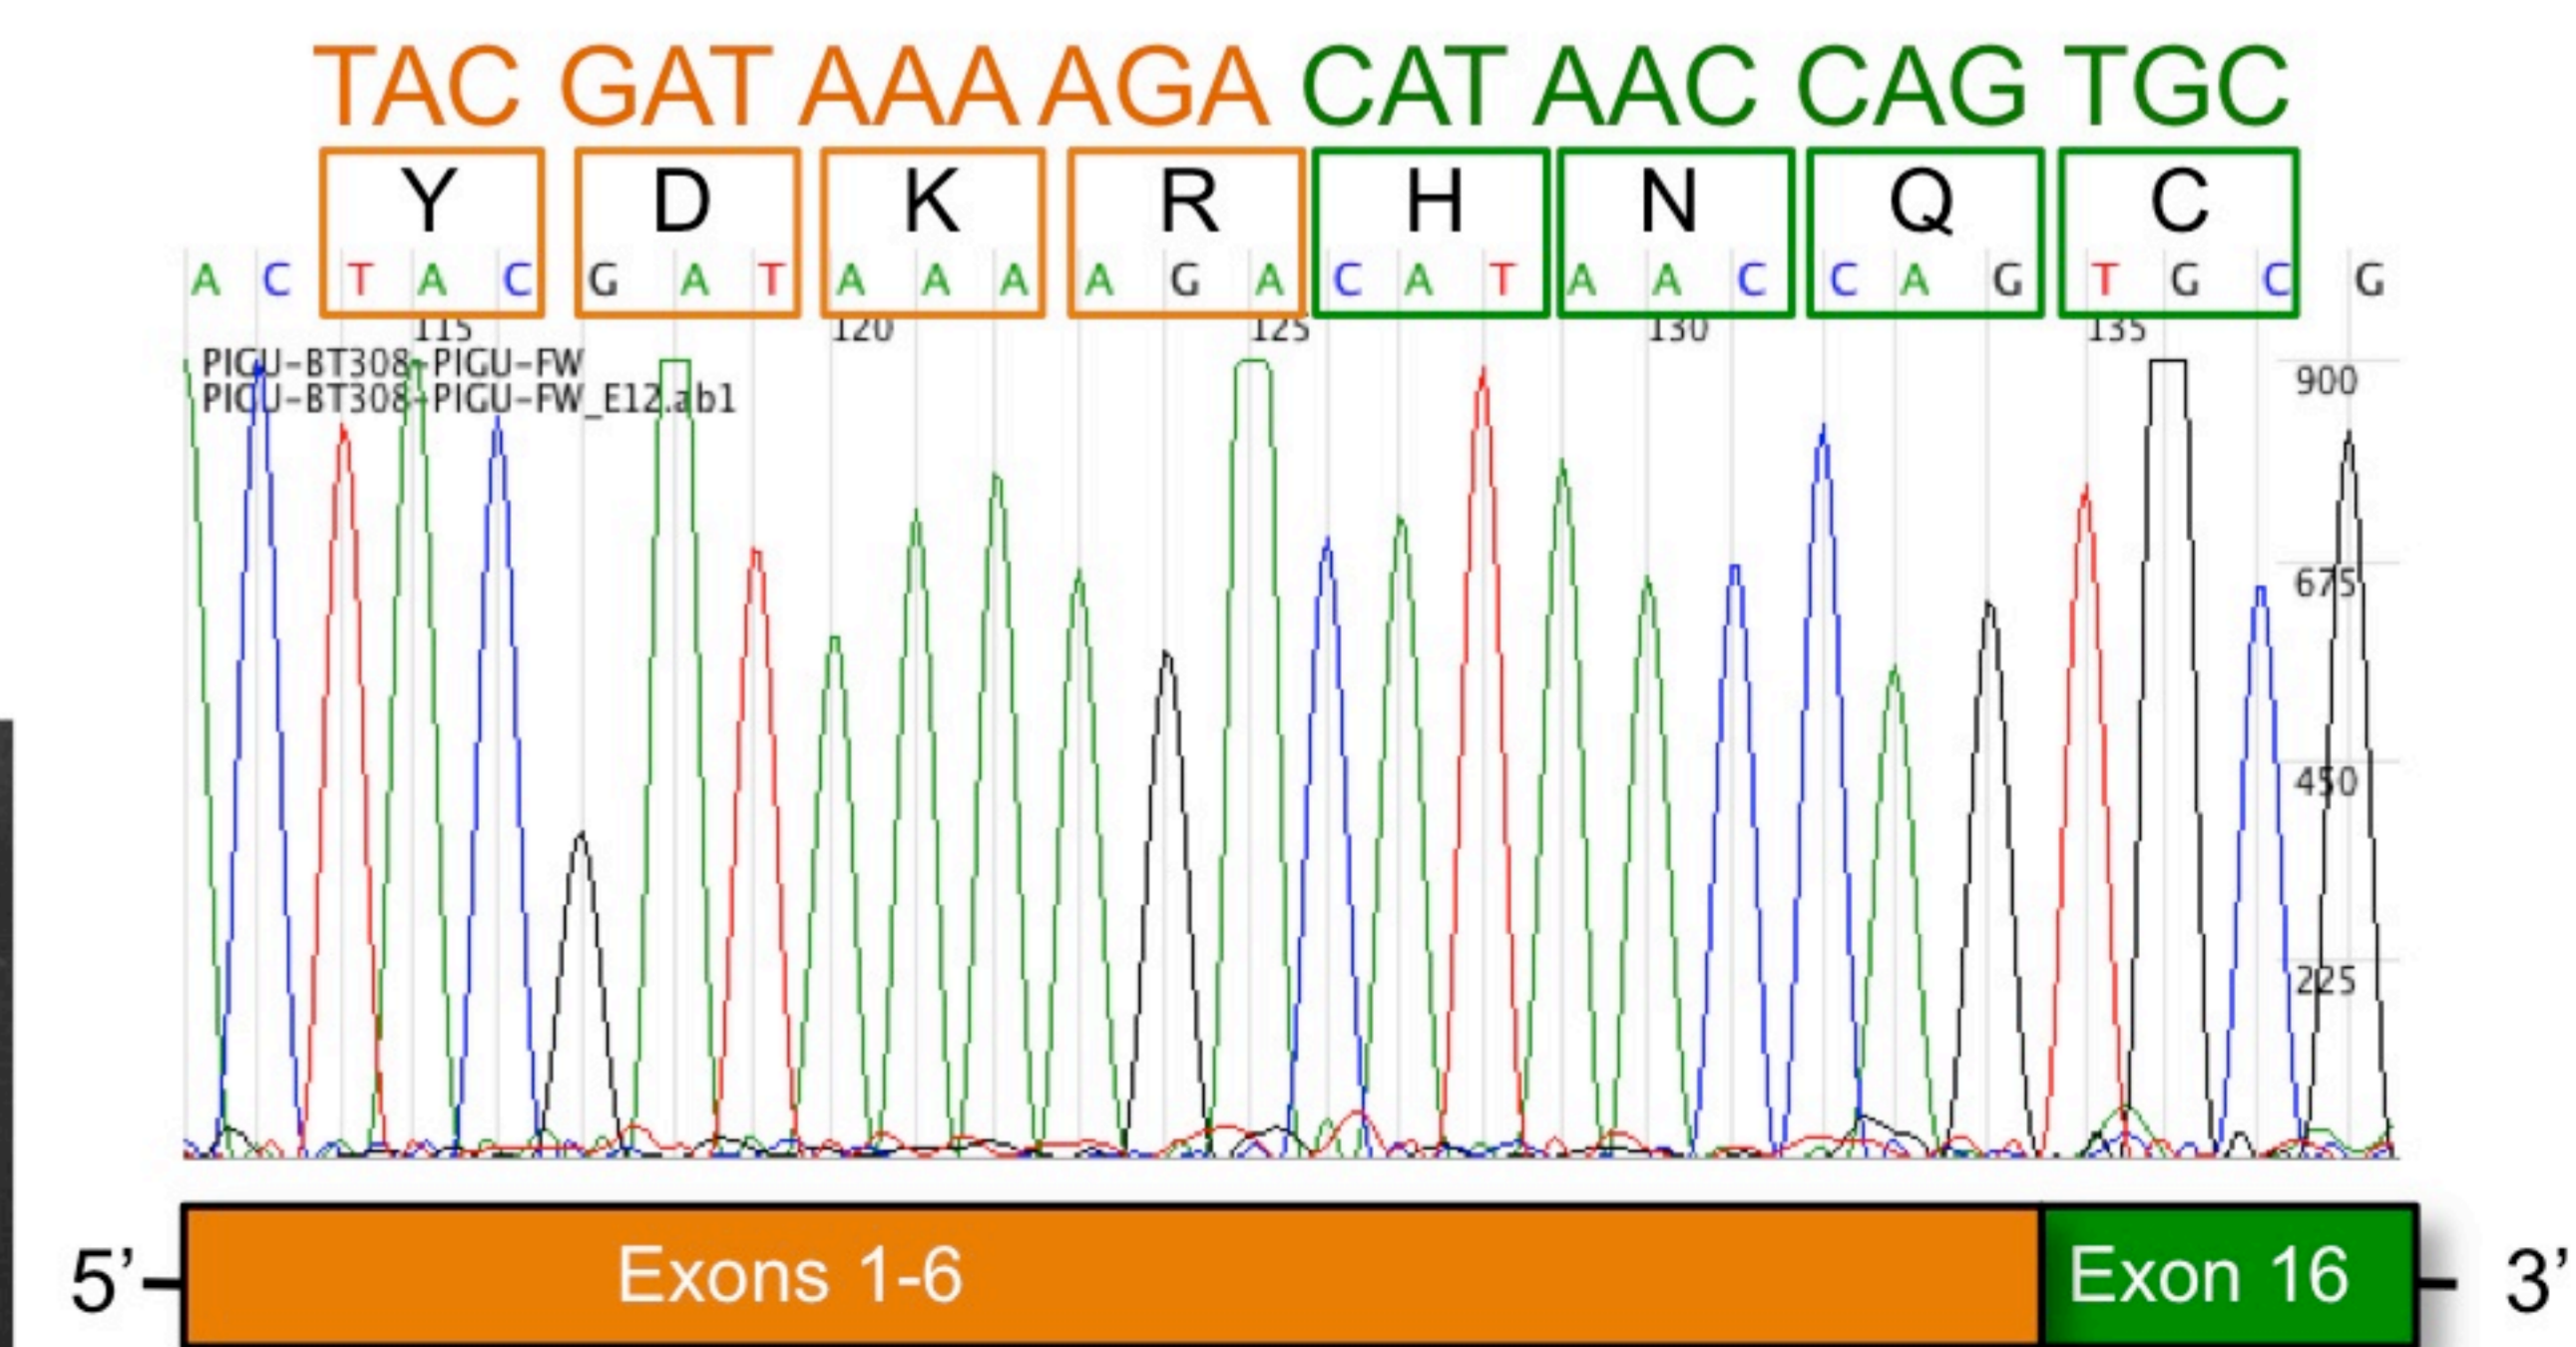

Figure S1

**A**

```

MGAPACALALCVAVAI VAGASSESLGTEQRVVGRAAEVPGPEPGQQEQLV 50
FGSGDAVELSCPPPGGGPMGPTVWVKDGTGLVPSERVLVGPQRLQVLNAS 100
HEDSGAYSCRQRLTQRVLCHFVSRVTDAPSSGDDDEDEDAEDTGVDTGA 150
PYWTRPERMDKLLAVPAANTVRFRCPAAGNPTPSISWLKNGREFRGEHR 200
IGGIKLRHQQWLSVMESVPSDRGNVTCVVENKFGSIRQTYTLDVLEERS 250
HRPILQAGLPANQTAVLGSDFEFHCKVYSDAQPHIQWLKHVEVNGSKVGP 300
DGTPYVTVLKTAGANTTDKELEVLSLHNVTFFEDAGEYTCLAGNSIGFSHH 350
SAWLVLPAEEELVEADEAGSVYAGILSYGVGFFLFIILVVAAVTLCRLRS 400
PPKKGLGSPTVHKISRFP LKRQVSLESNASMSNTPLVRIARLSSGEGPT 450
LANVSELELPADPKWELSRARLTGKPLGEGCFGQVVM AE AIGIDKDRAA 500
KPVTVAVKMLKDDATDKDLSDLVSEM EMMKMIKHKNI INLLGACTQGGP 550
LYVLVEYAAKGNLREFLRARRPPGLDYSFDTCKPPEEQ LTFKDLVSCAYQ 600
VARGMEYLASQKCIHRDLAARNVLVTEDNMKIADFG LARDVHNLDYYKK 650
TTNGRLPVKWM APEALFDRVYTHQSDVWSFGVLLWEIFTLGGSYPYGP 700
EELFKLLKEGHRMDKPANCTHDLYMIMRECWHAA PSQRPTFKQLVEDLDR 750
VLTVTSTDFKESALRKQSLYLKFDPLLRDSPGRPV PVATETSSMHGANET 800
PSGRPREAKLV EFDLFGALDIPVPGPPGVPAPGGP PLSTGPVLDLLOYS 850
QKDLDAVVKATQEENRELRSRCEELHGKNLELGKIMDRFEVVYQAMEEV 900
QKQKELSKAEIQKVLKEKDQLTTDLNSMEKSFSD LFKRFKQKEVIEGYR 950
KNEESLKKCVEDYLARITQEGQRYQALKAHAEK LQLANEEIAQVRSKAQ 1000
AEALALQASLRKEQMRIQSLEKTVEQKTKENEEL TRICDDLISKMEKI 1048

```

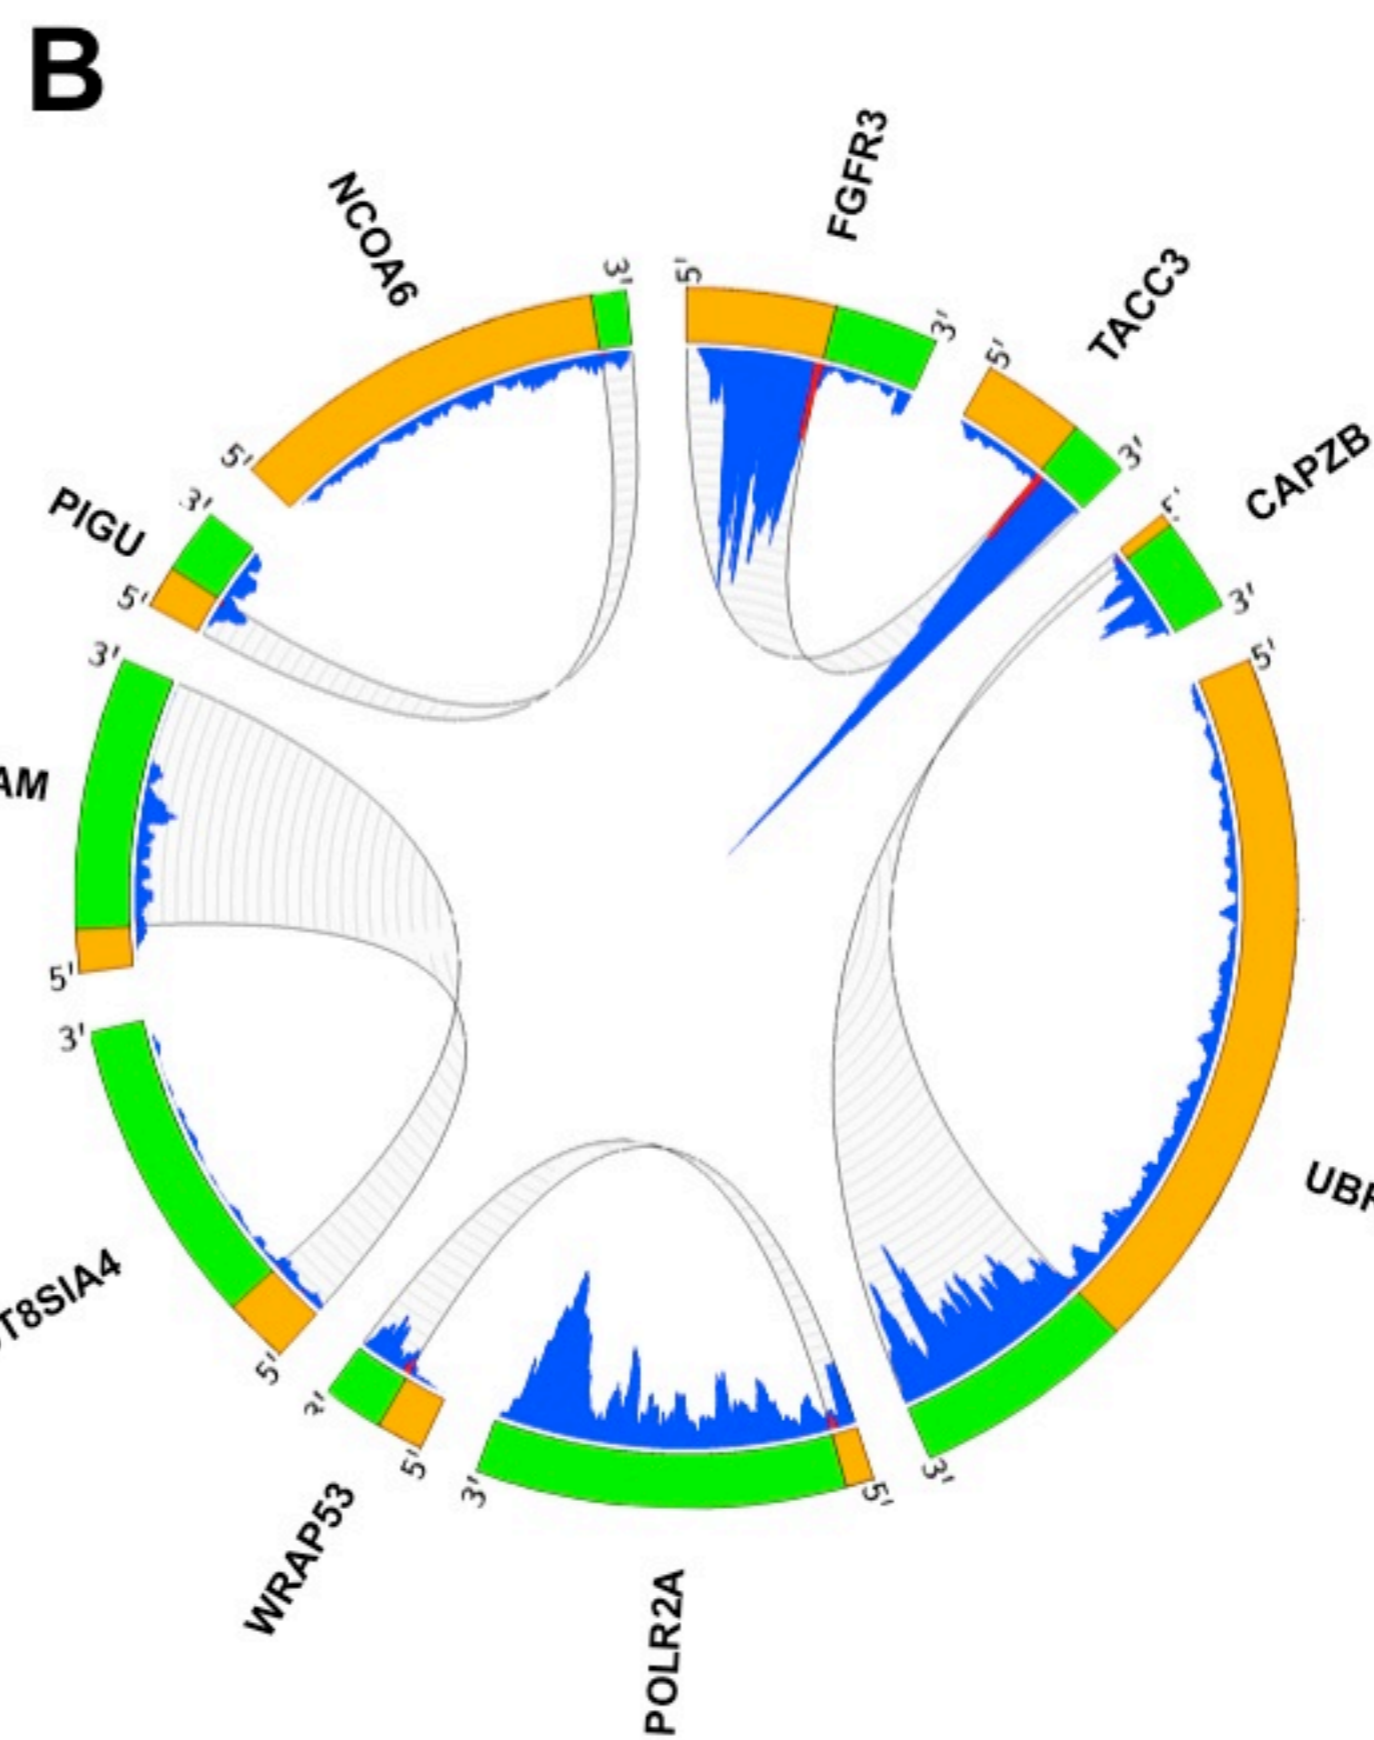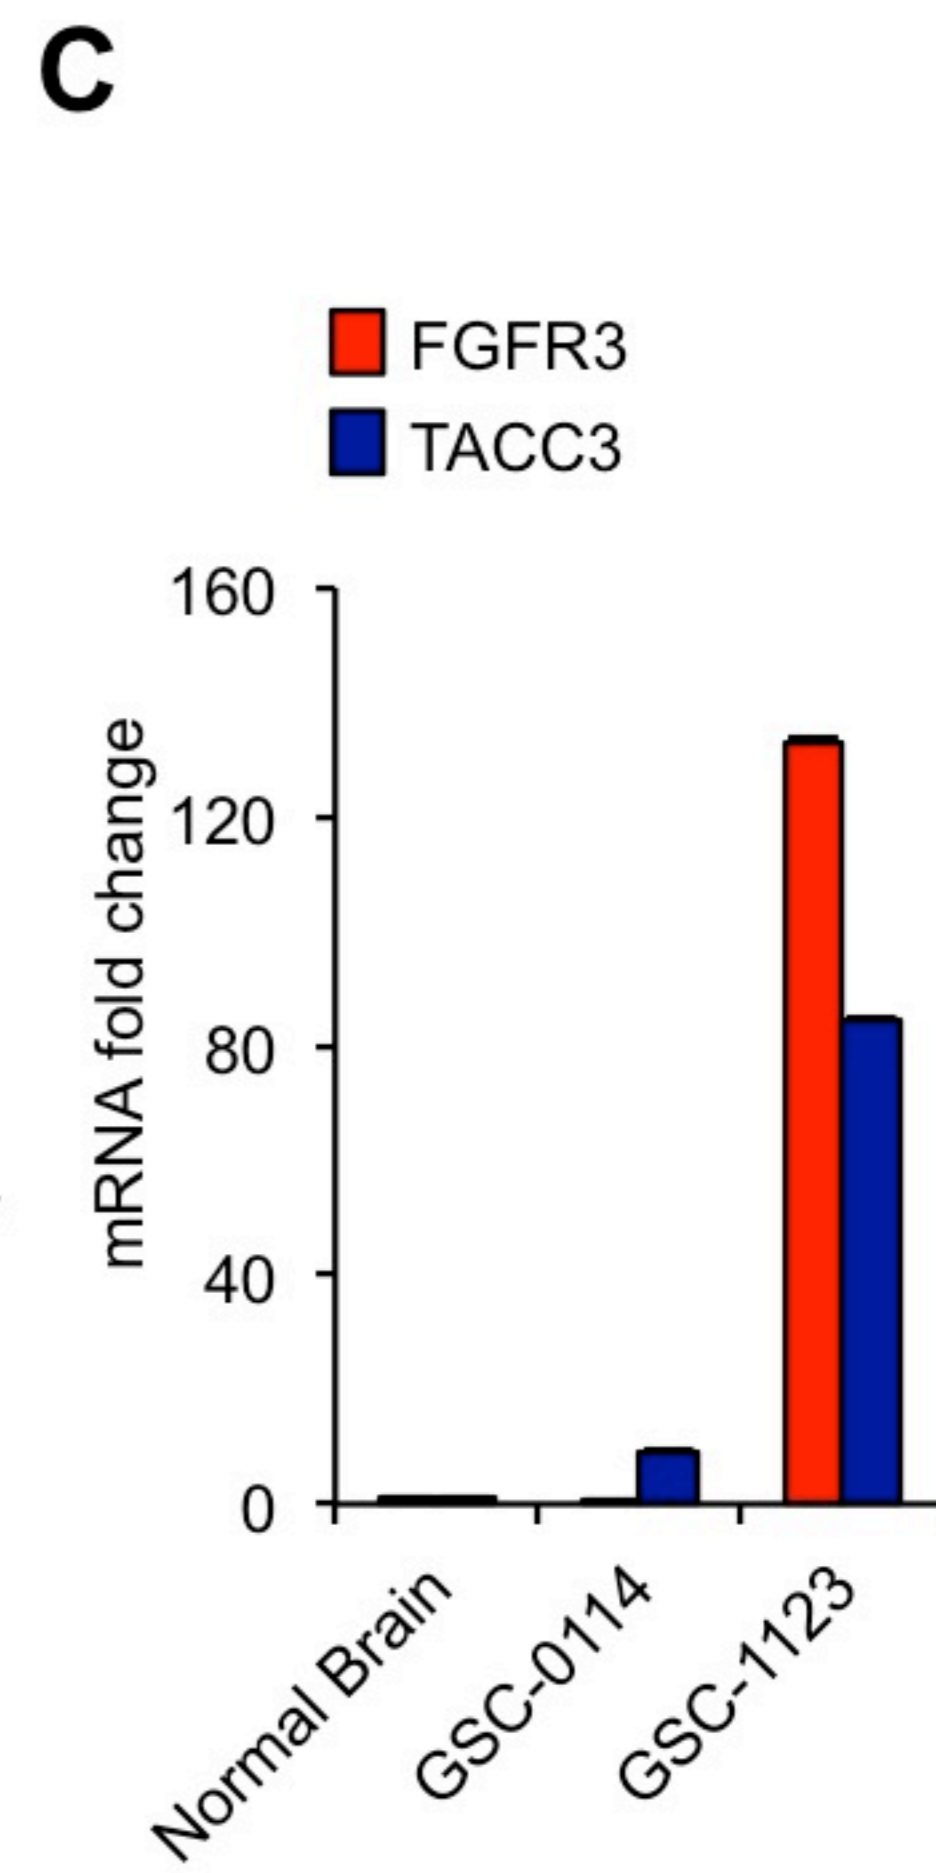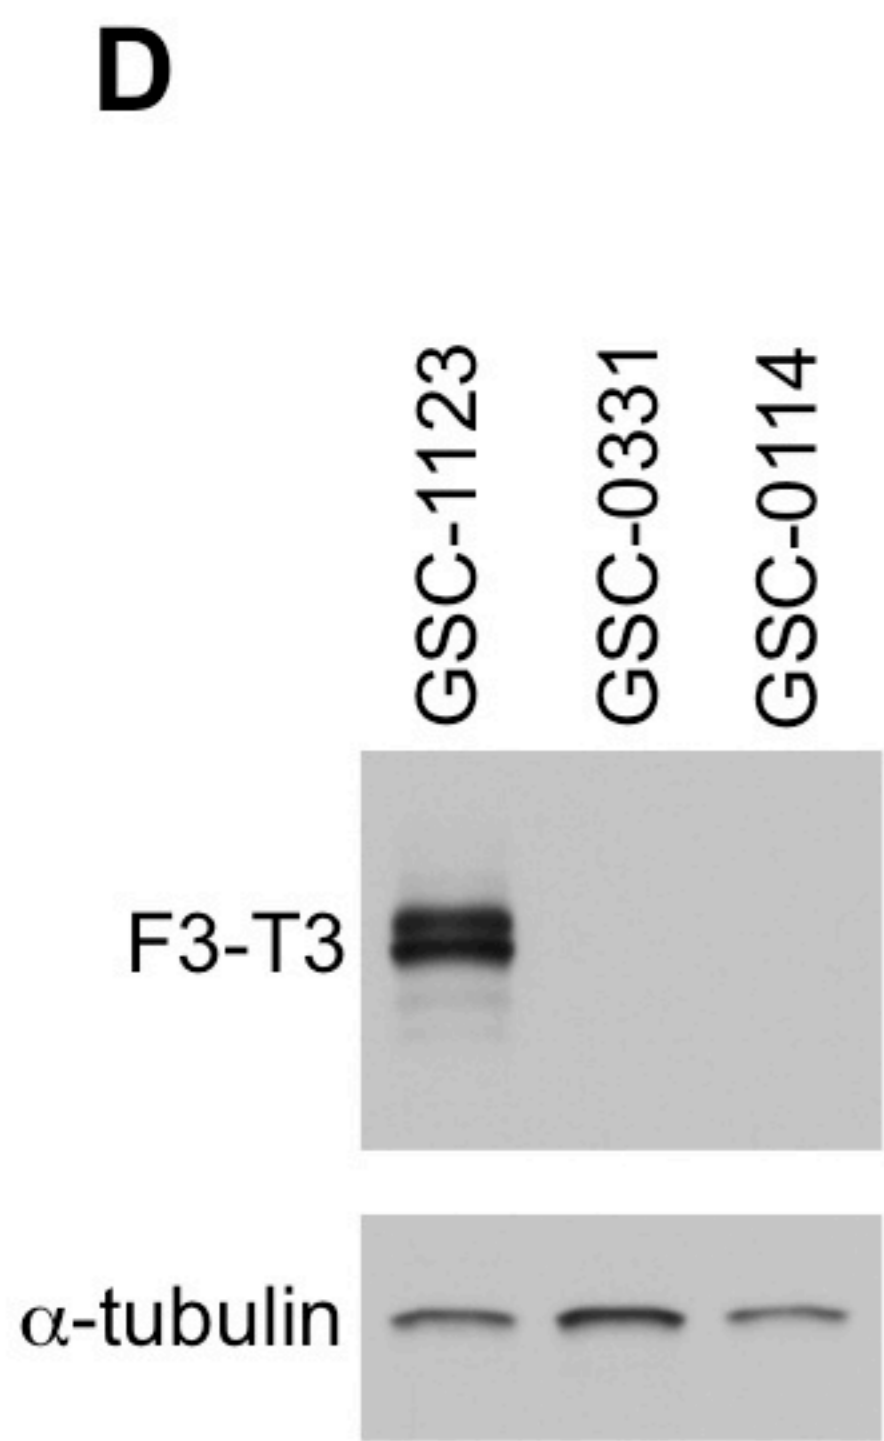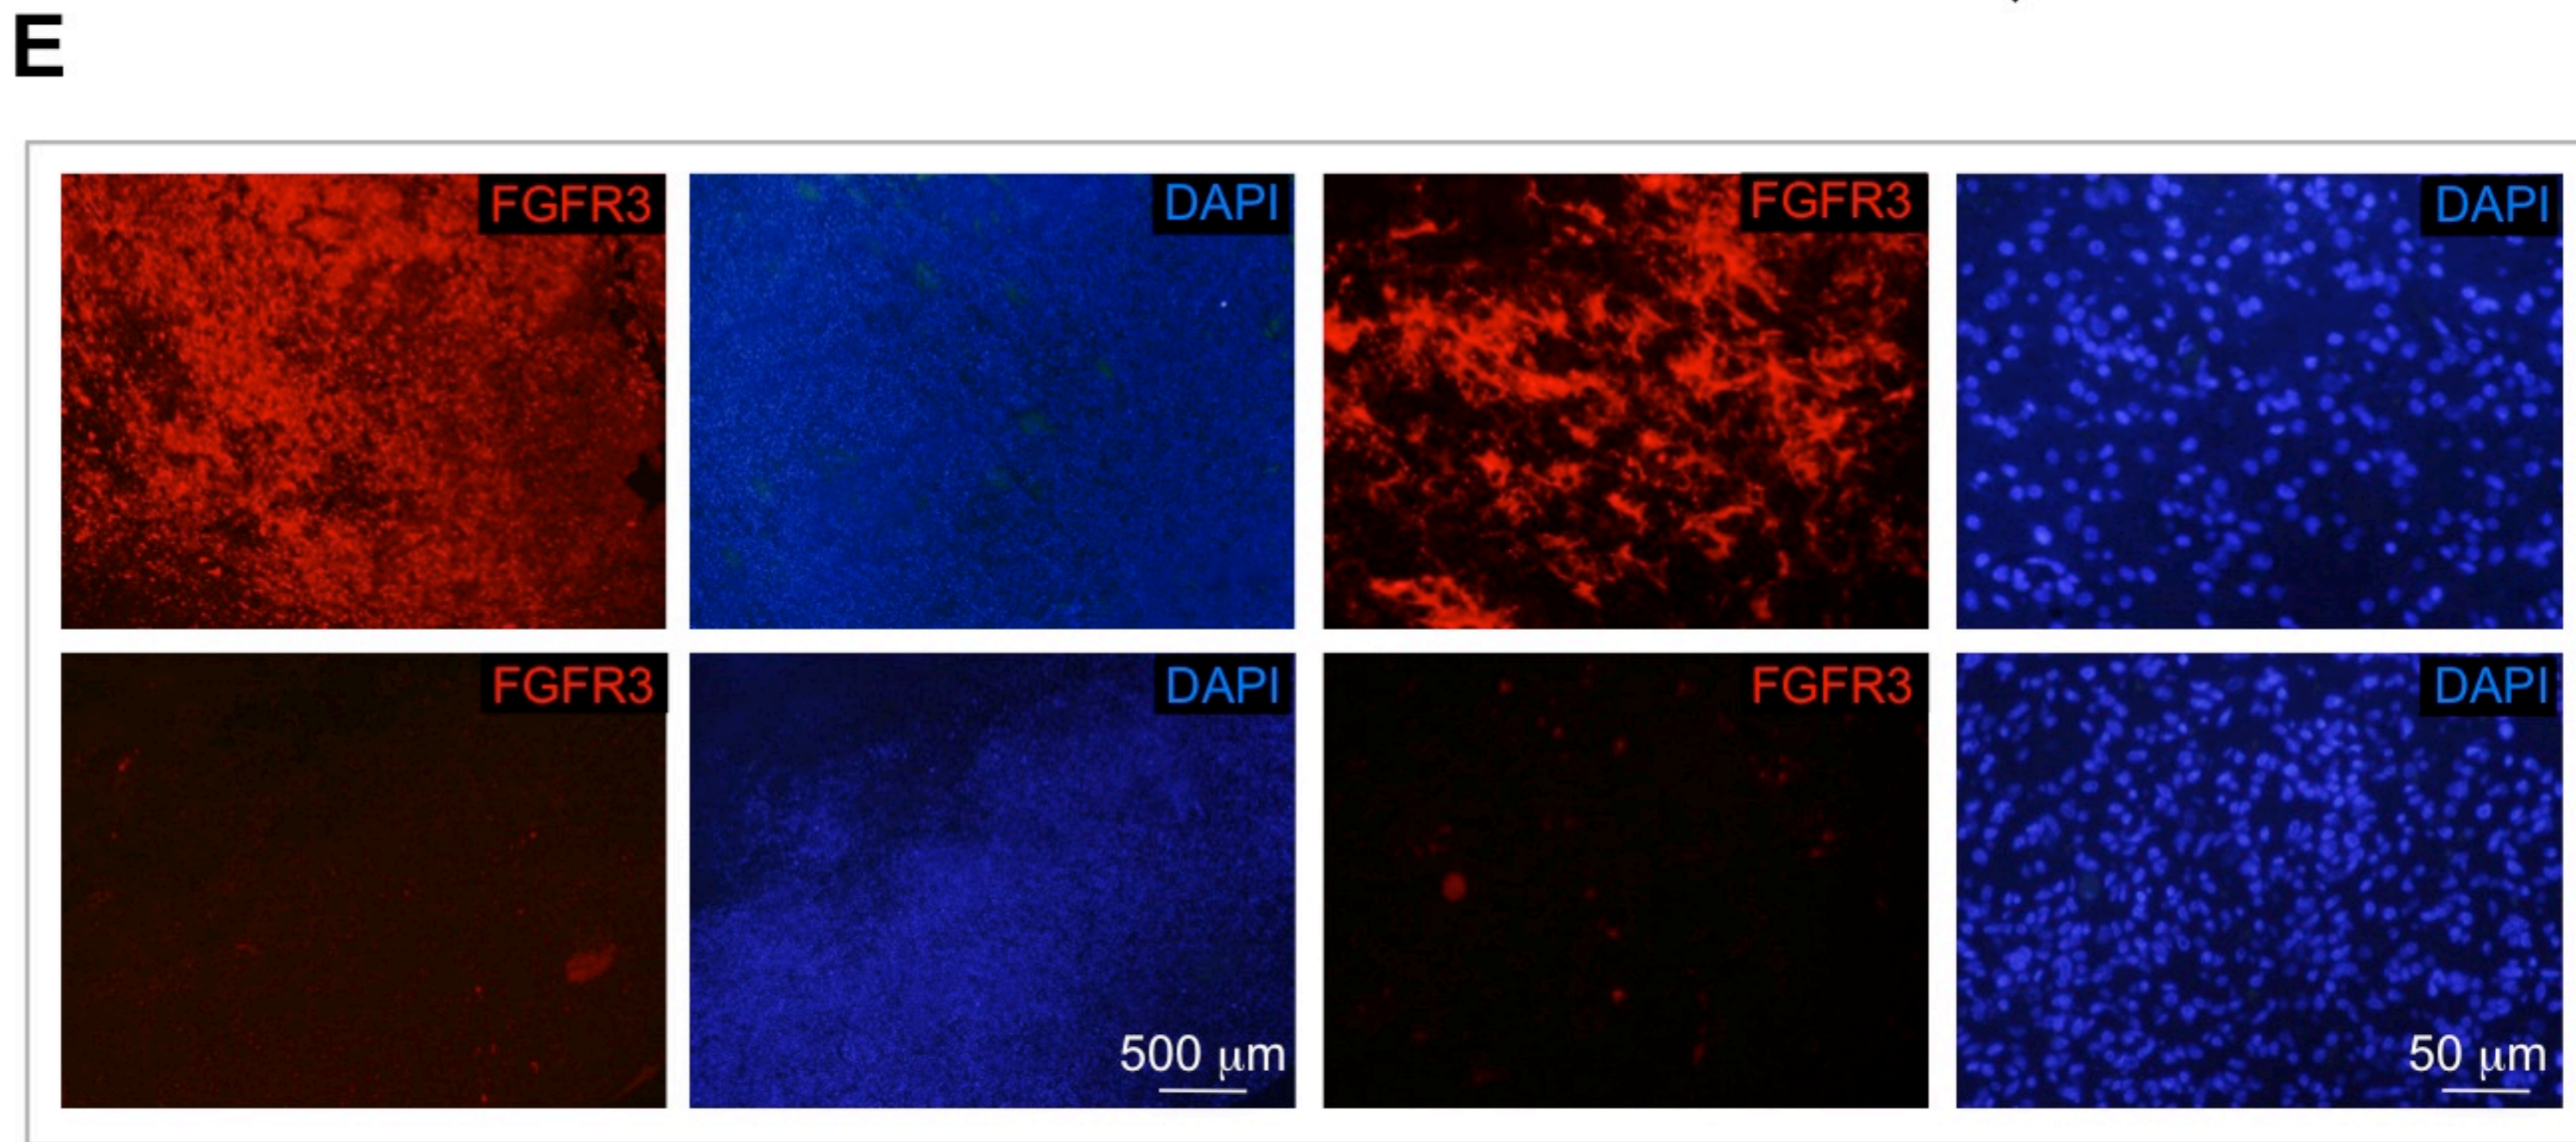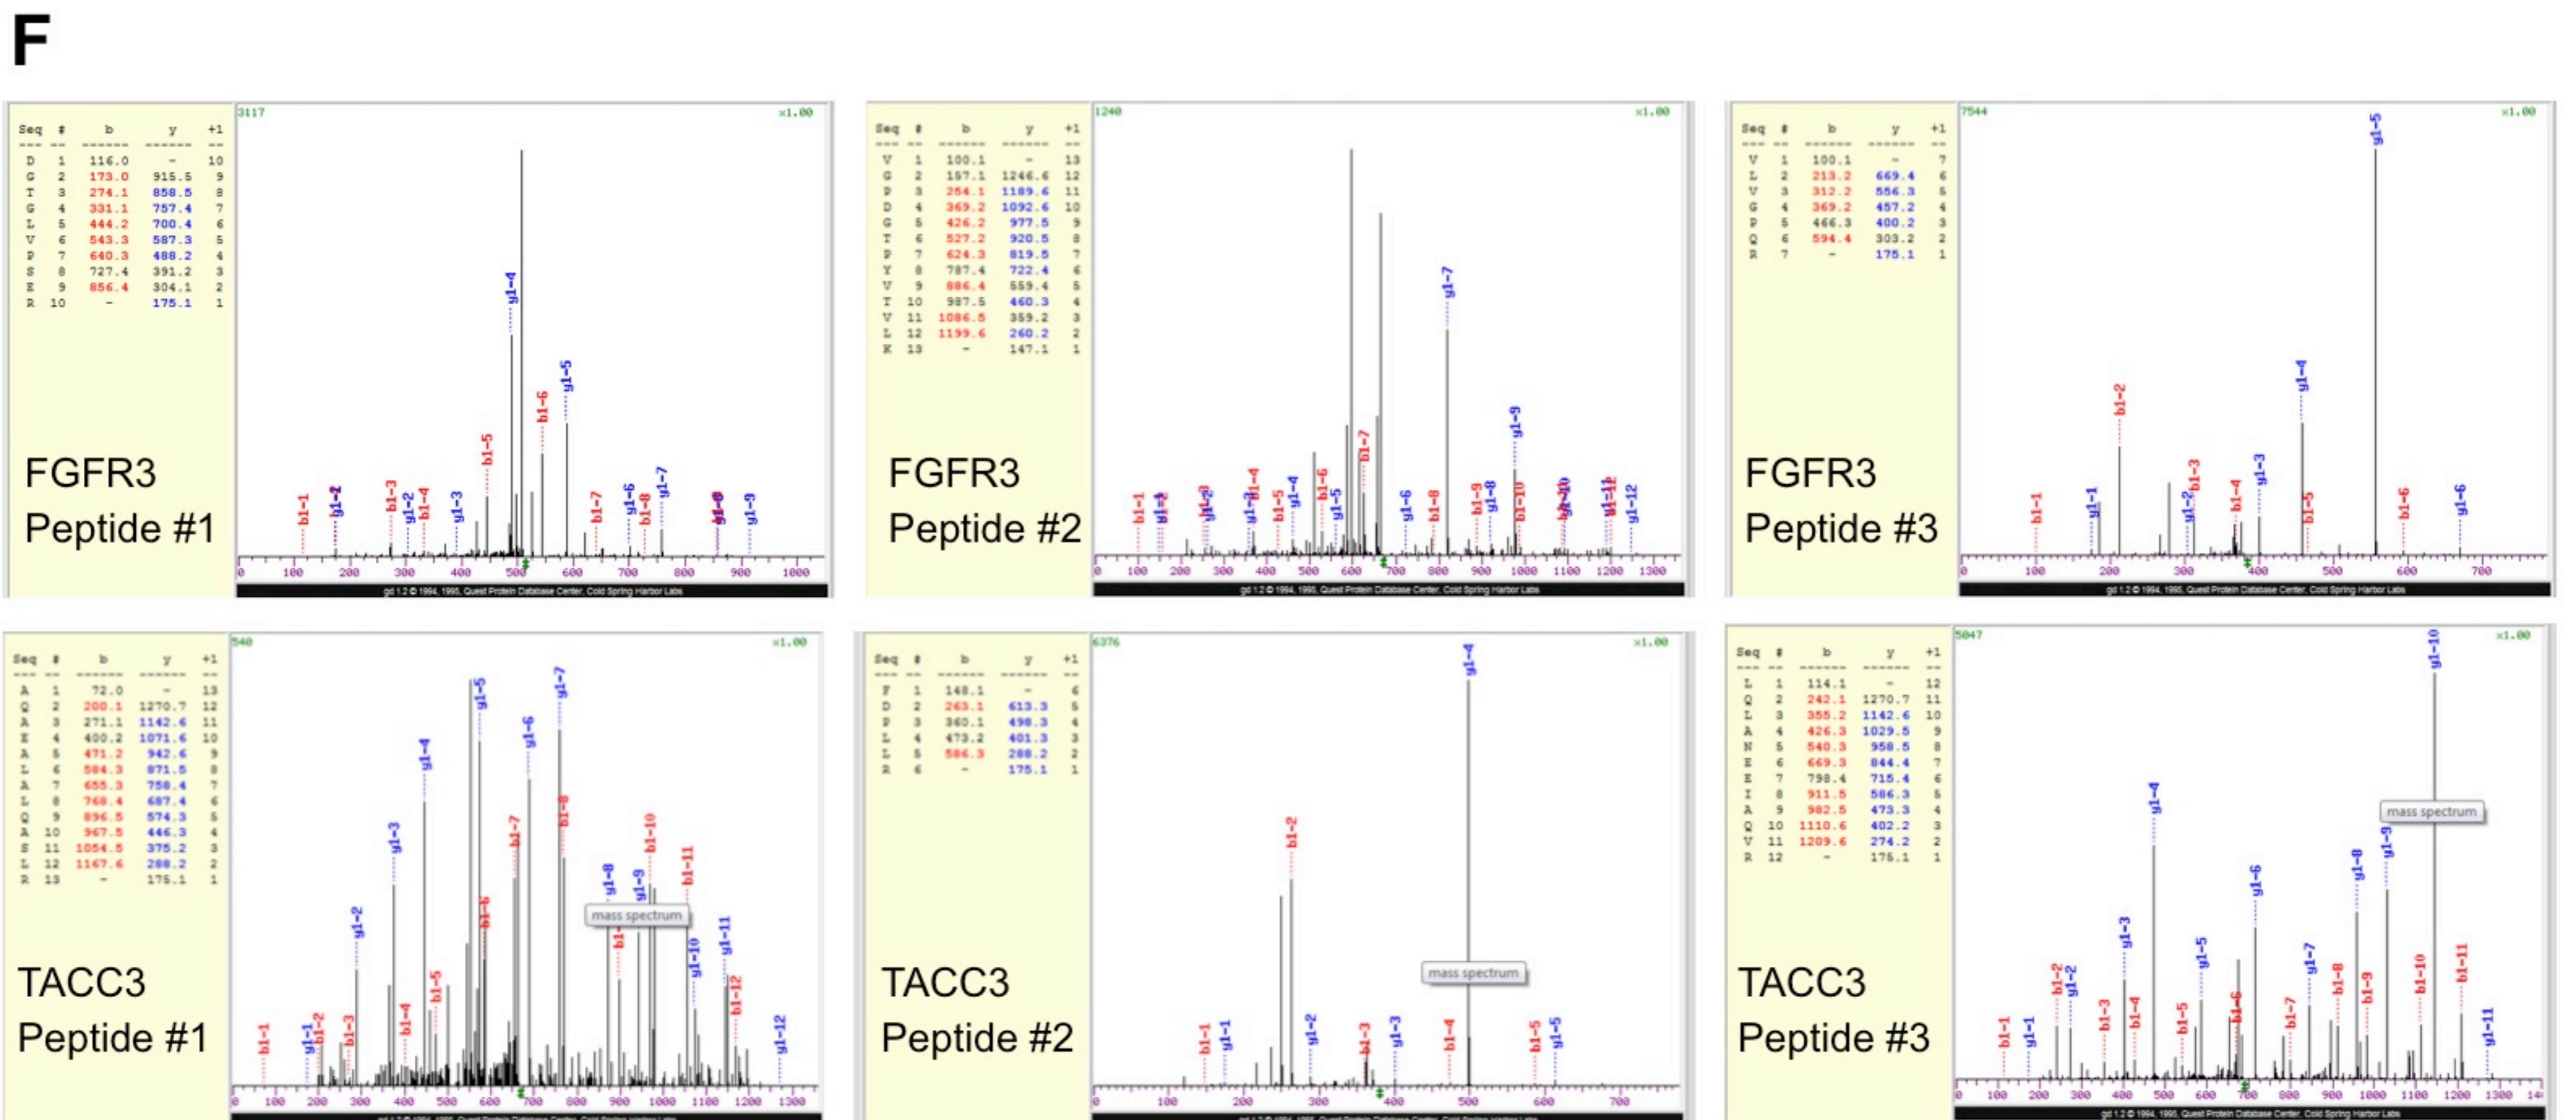

Figure S2

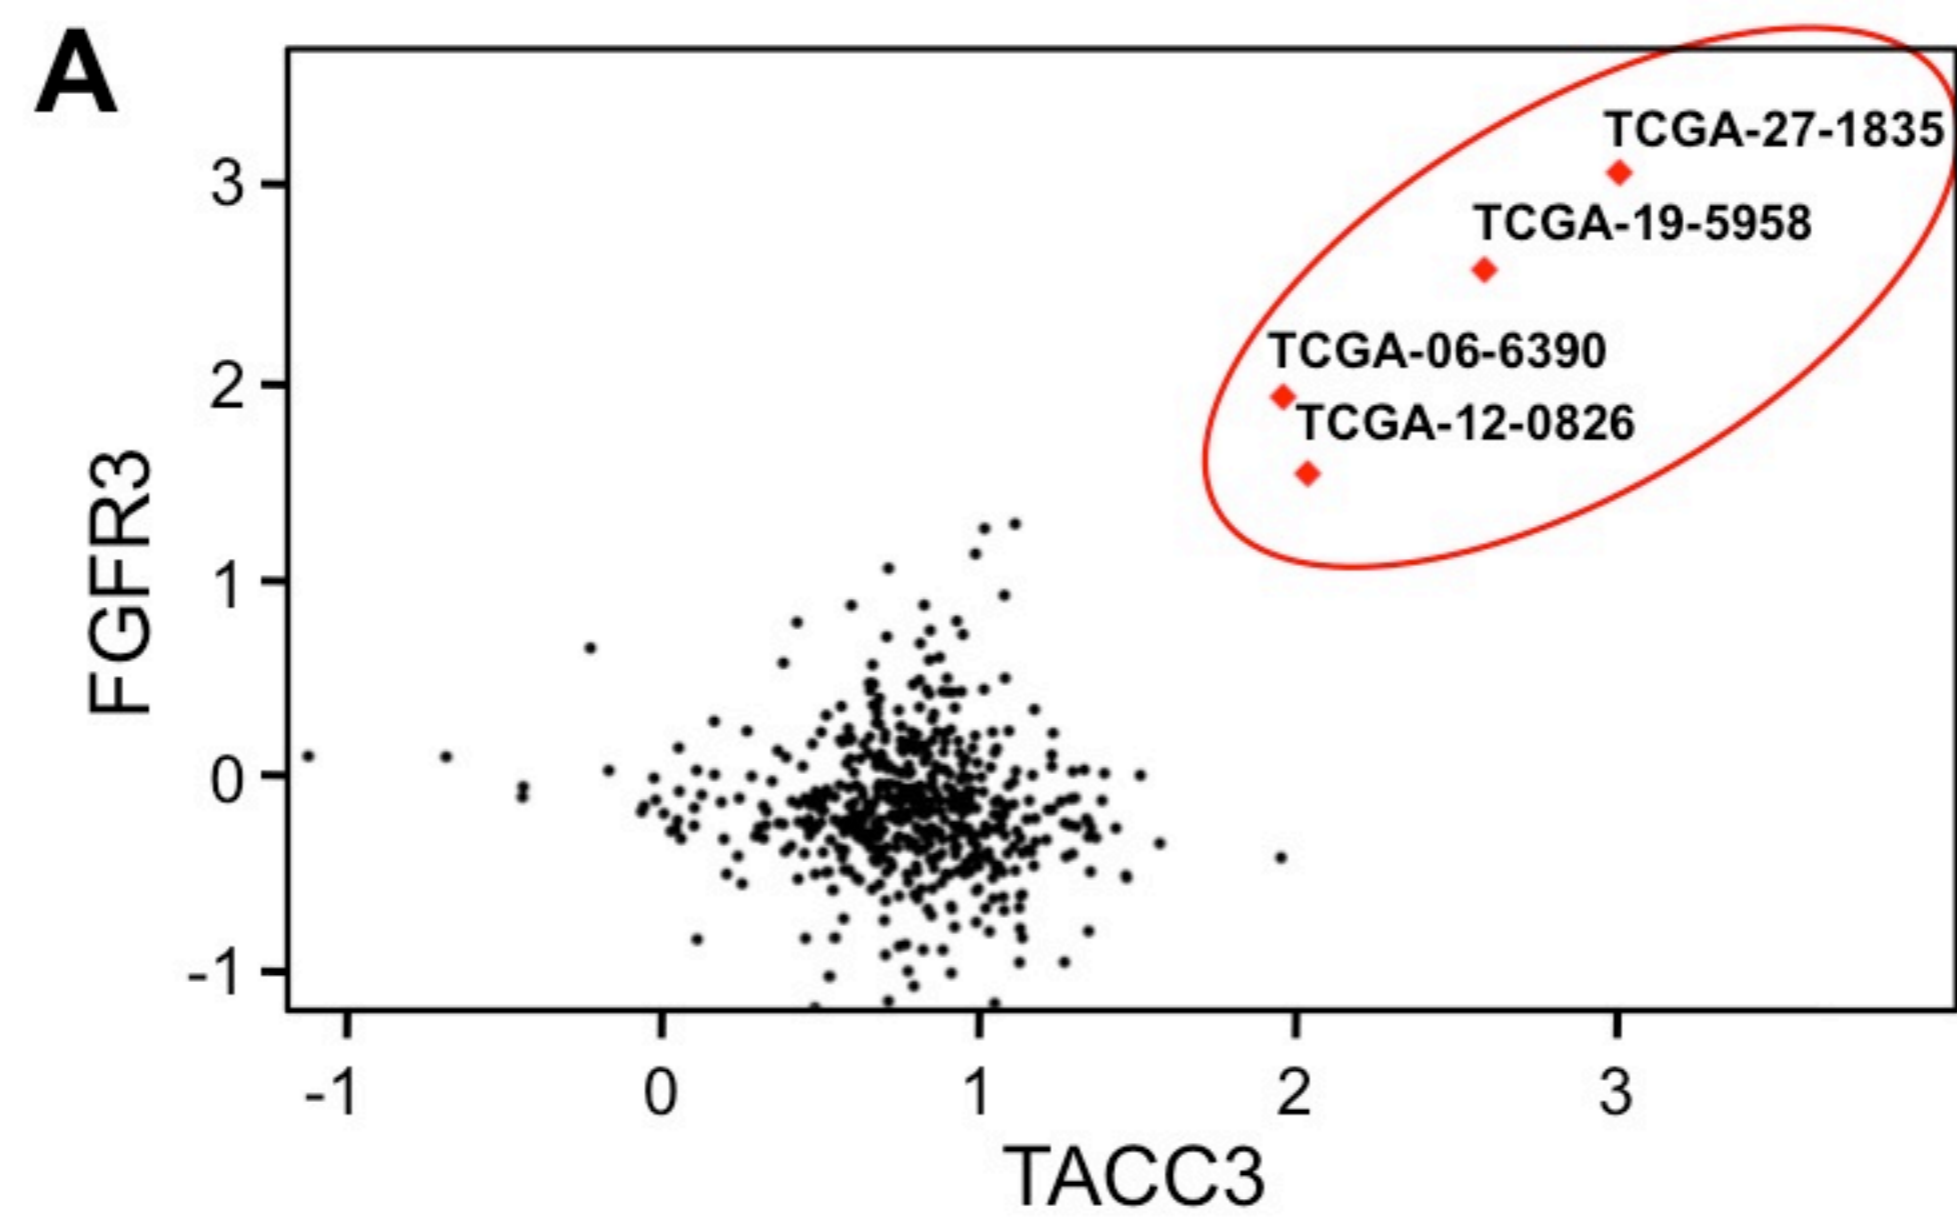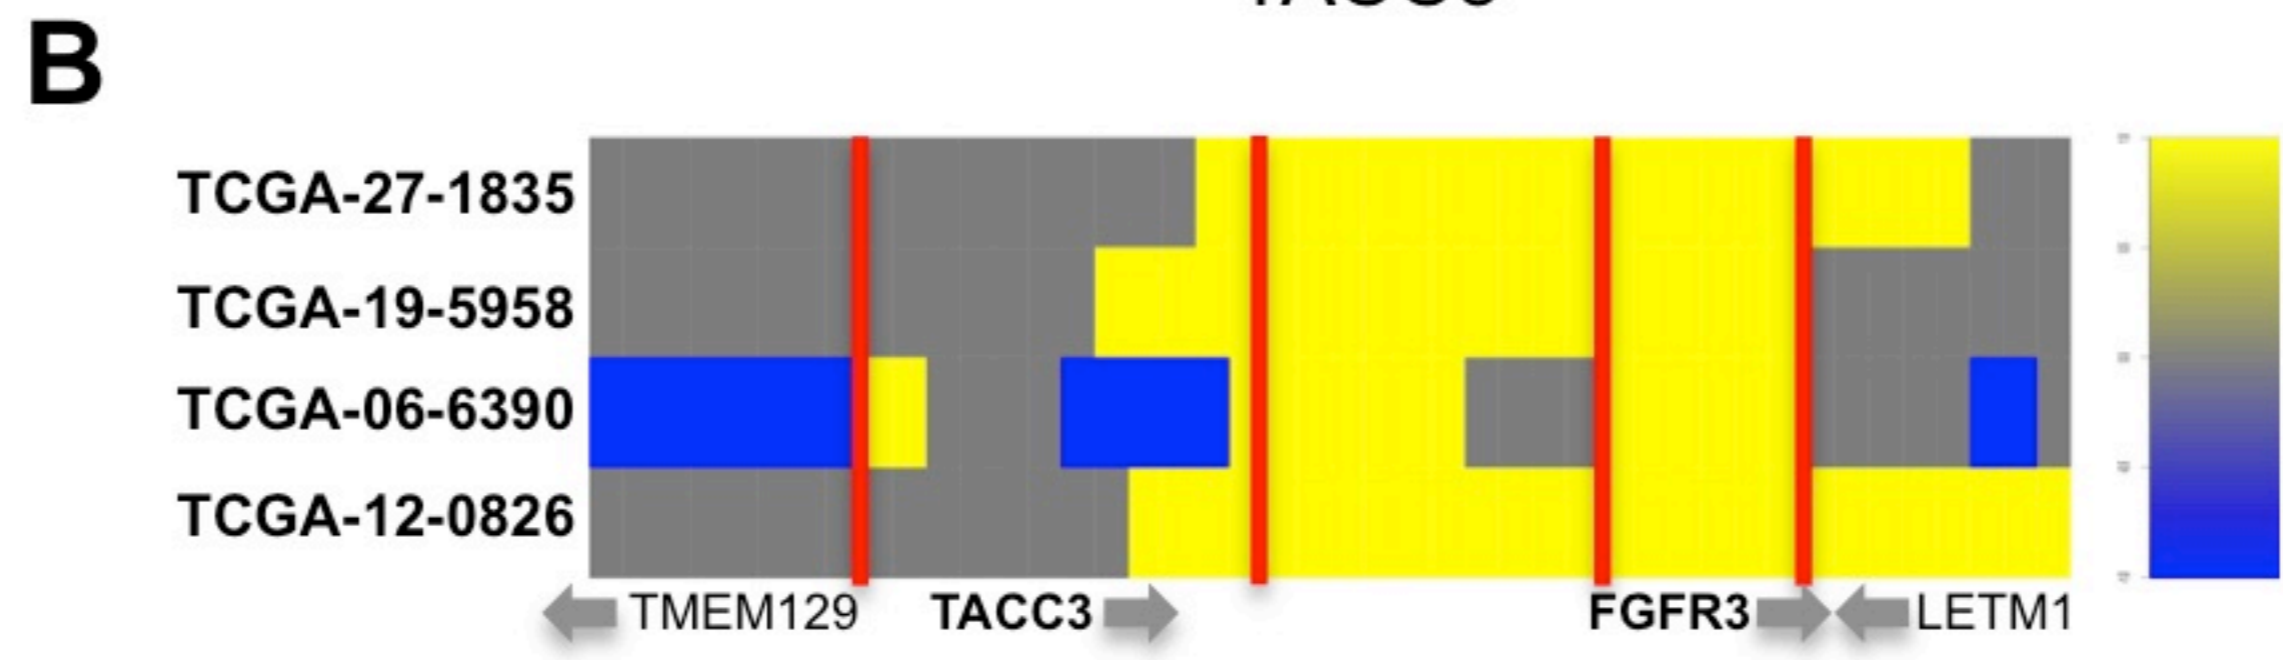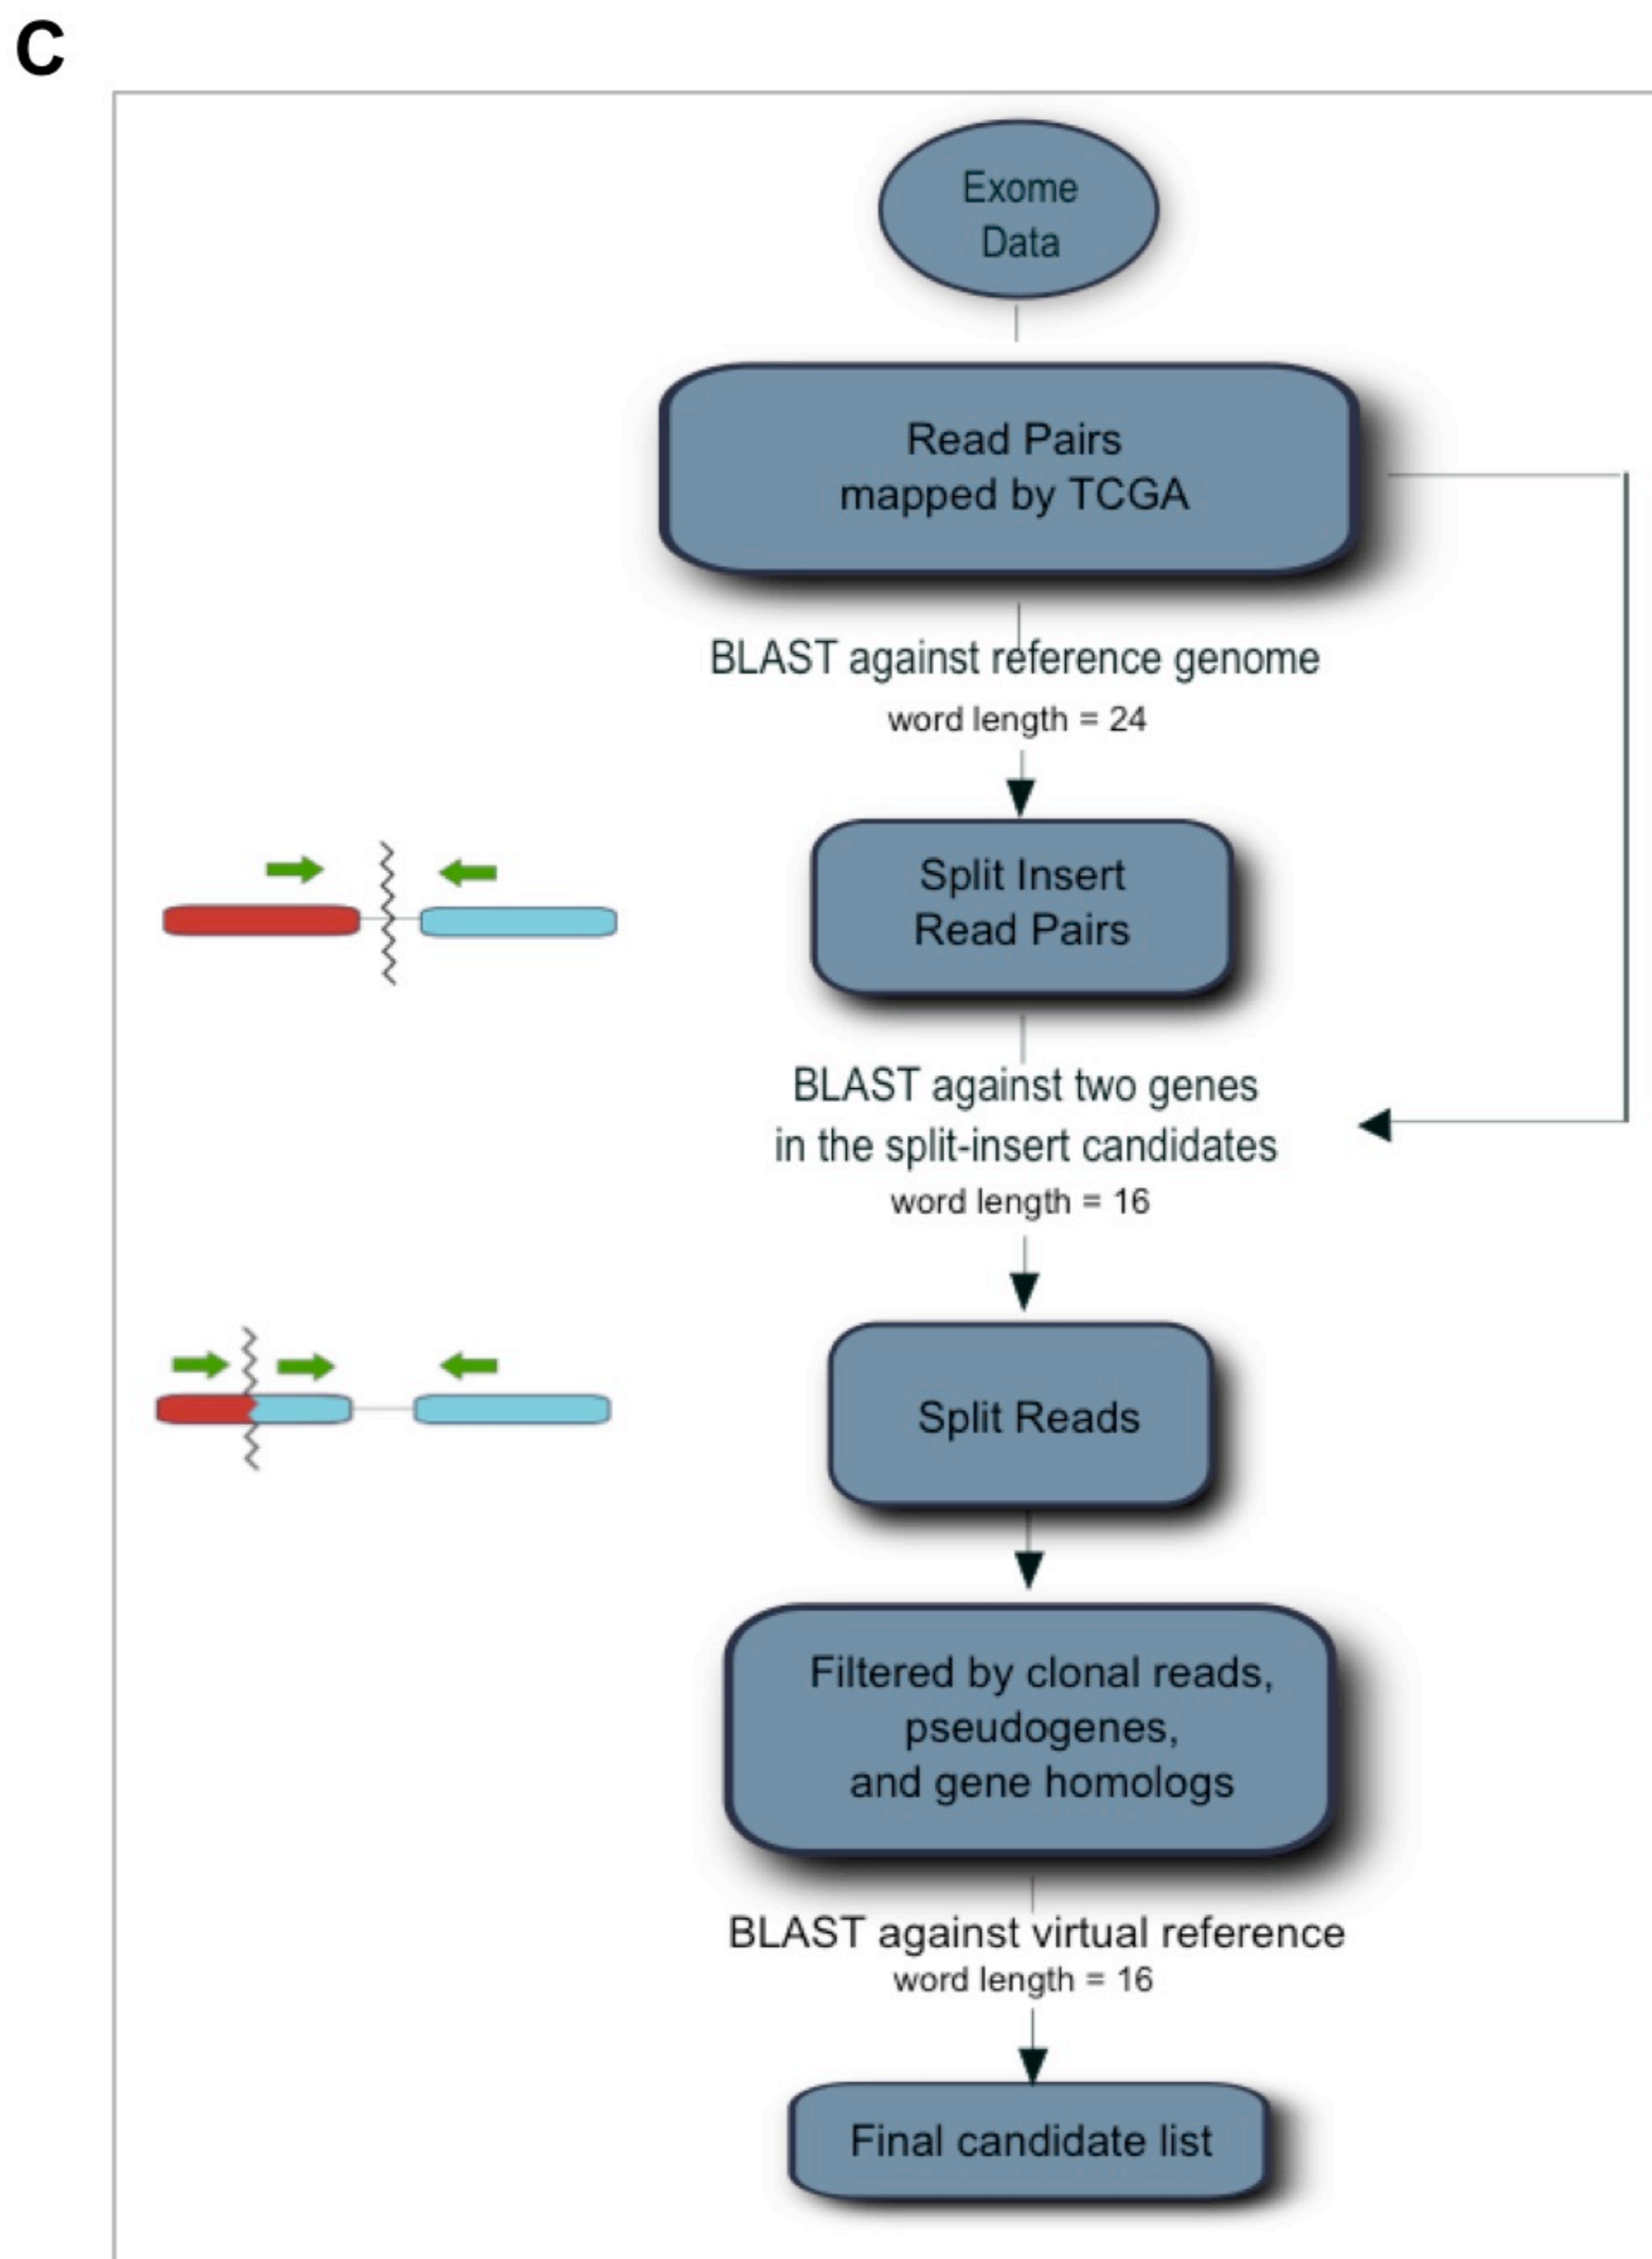

Figure S3

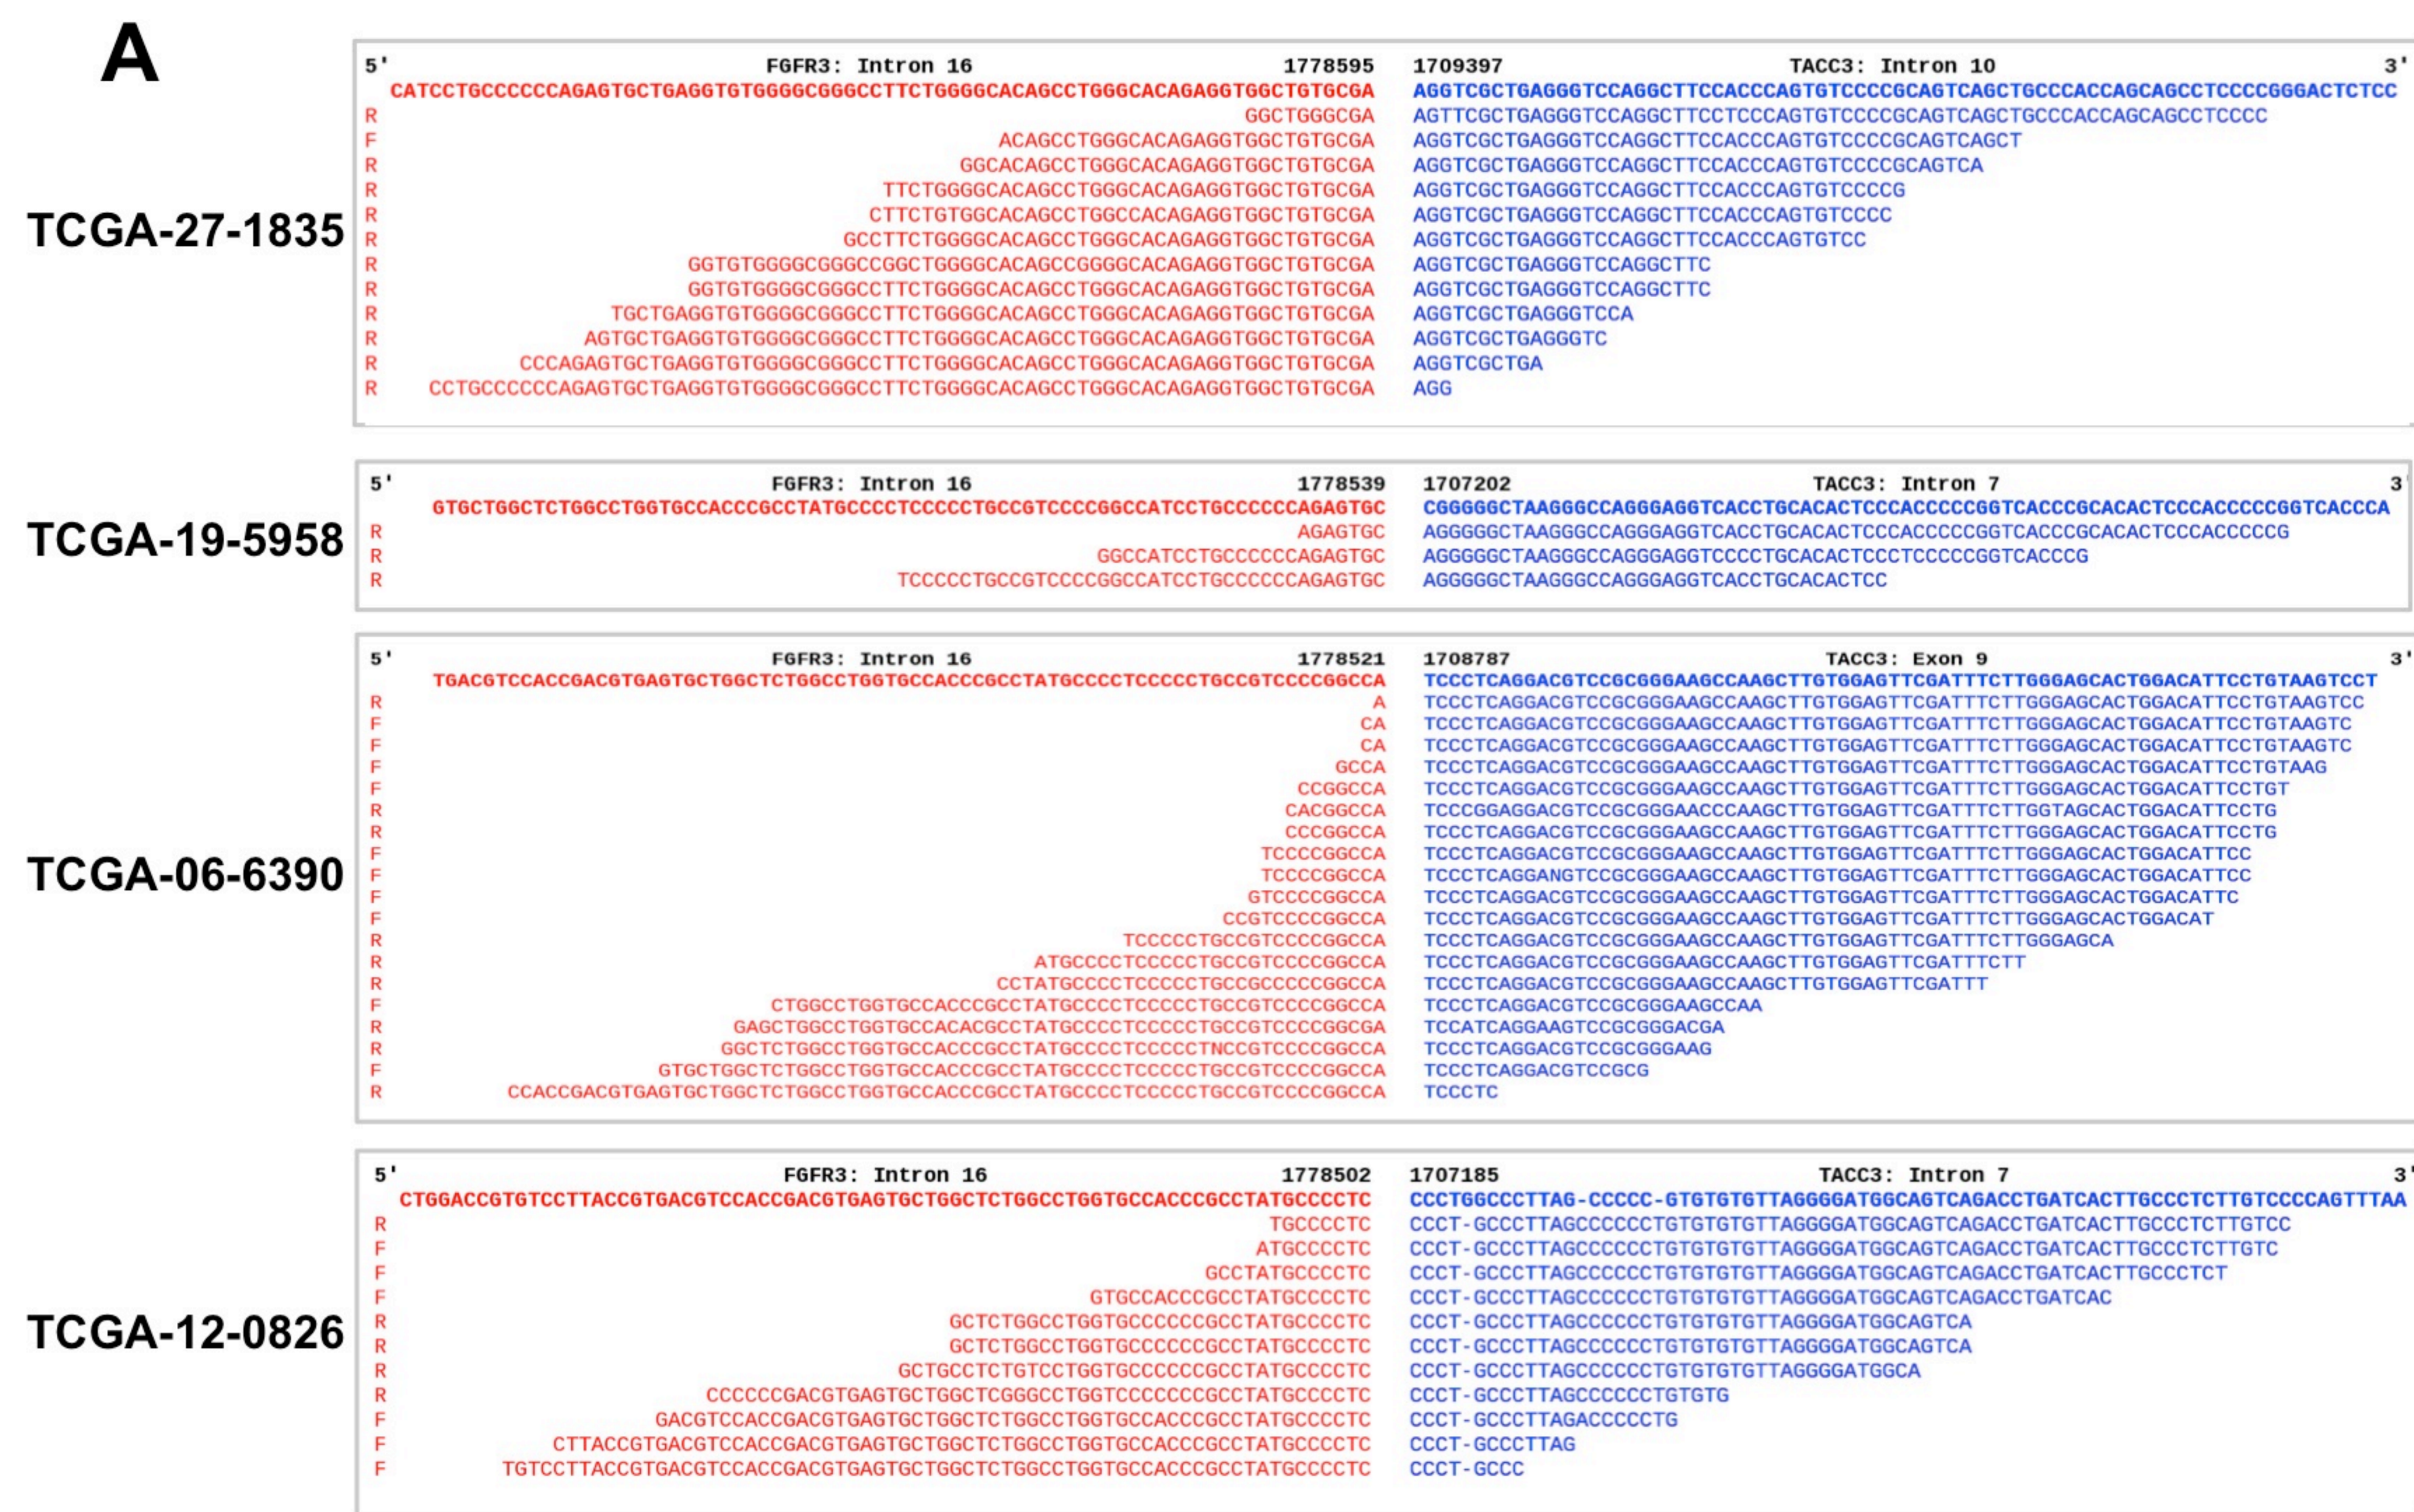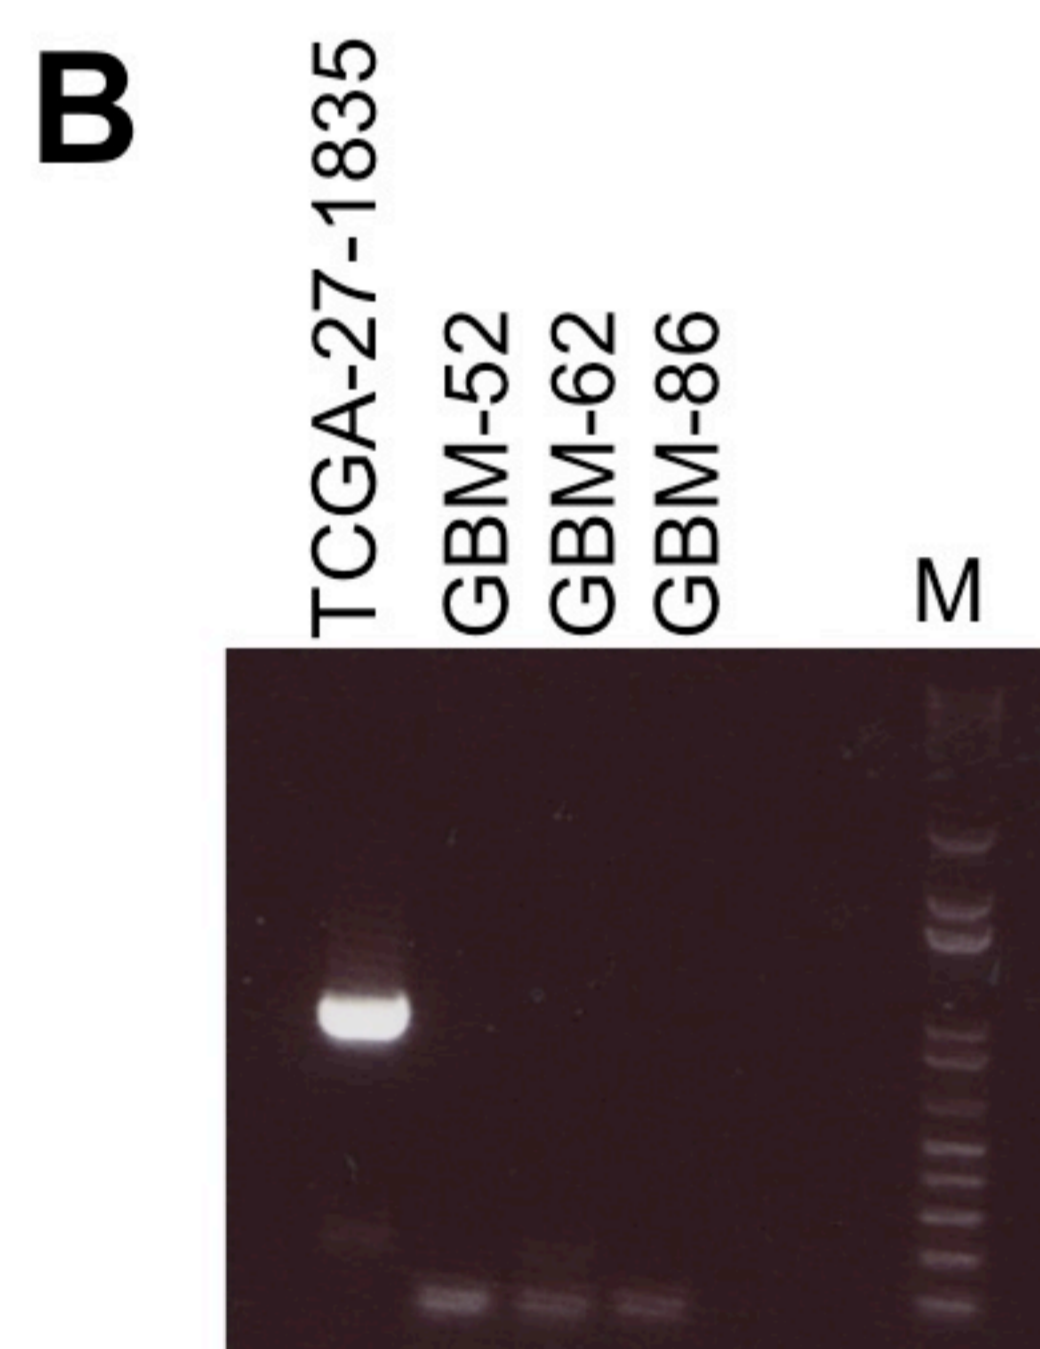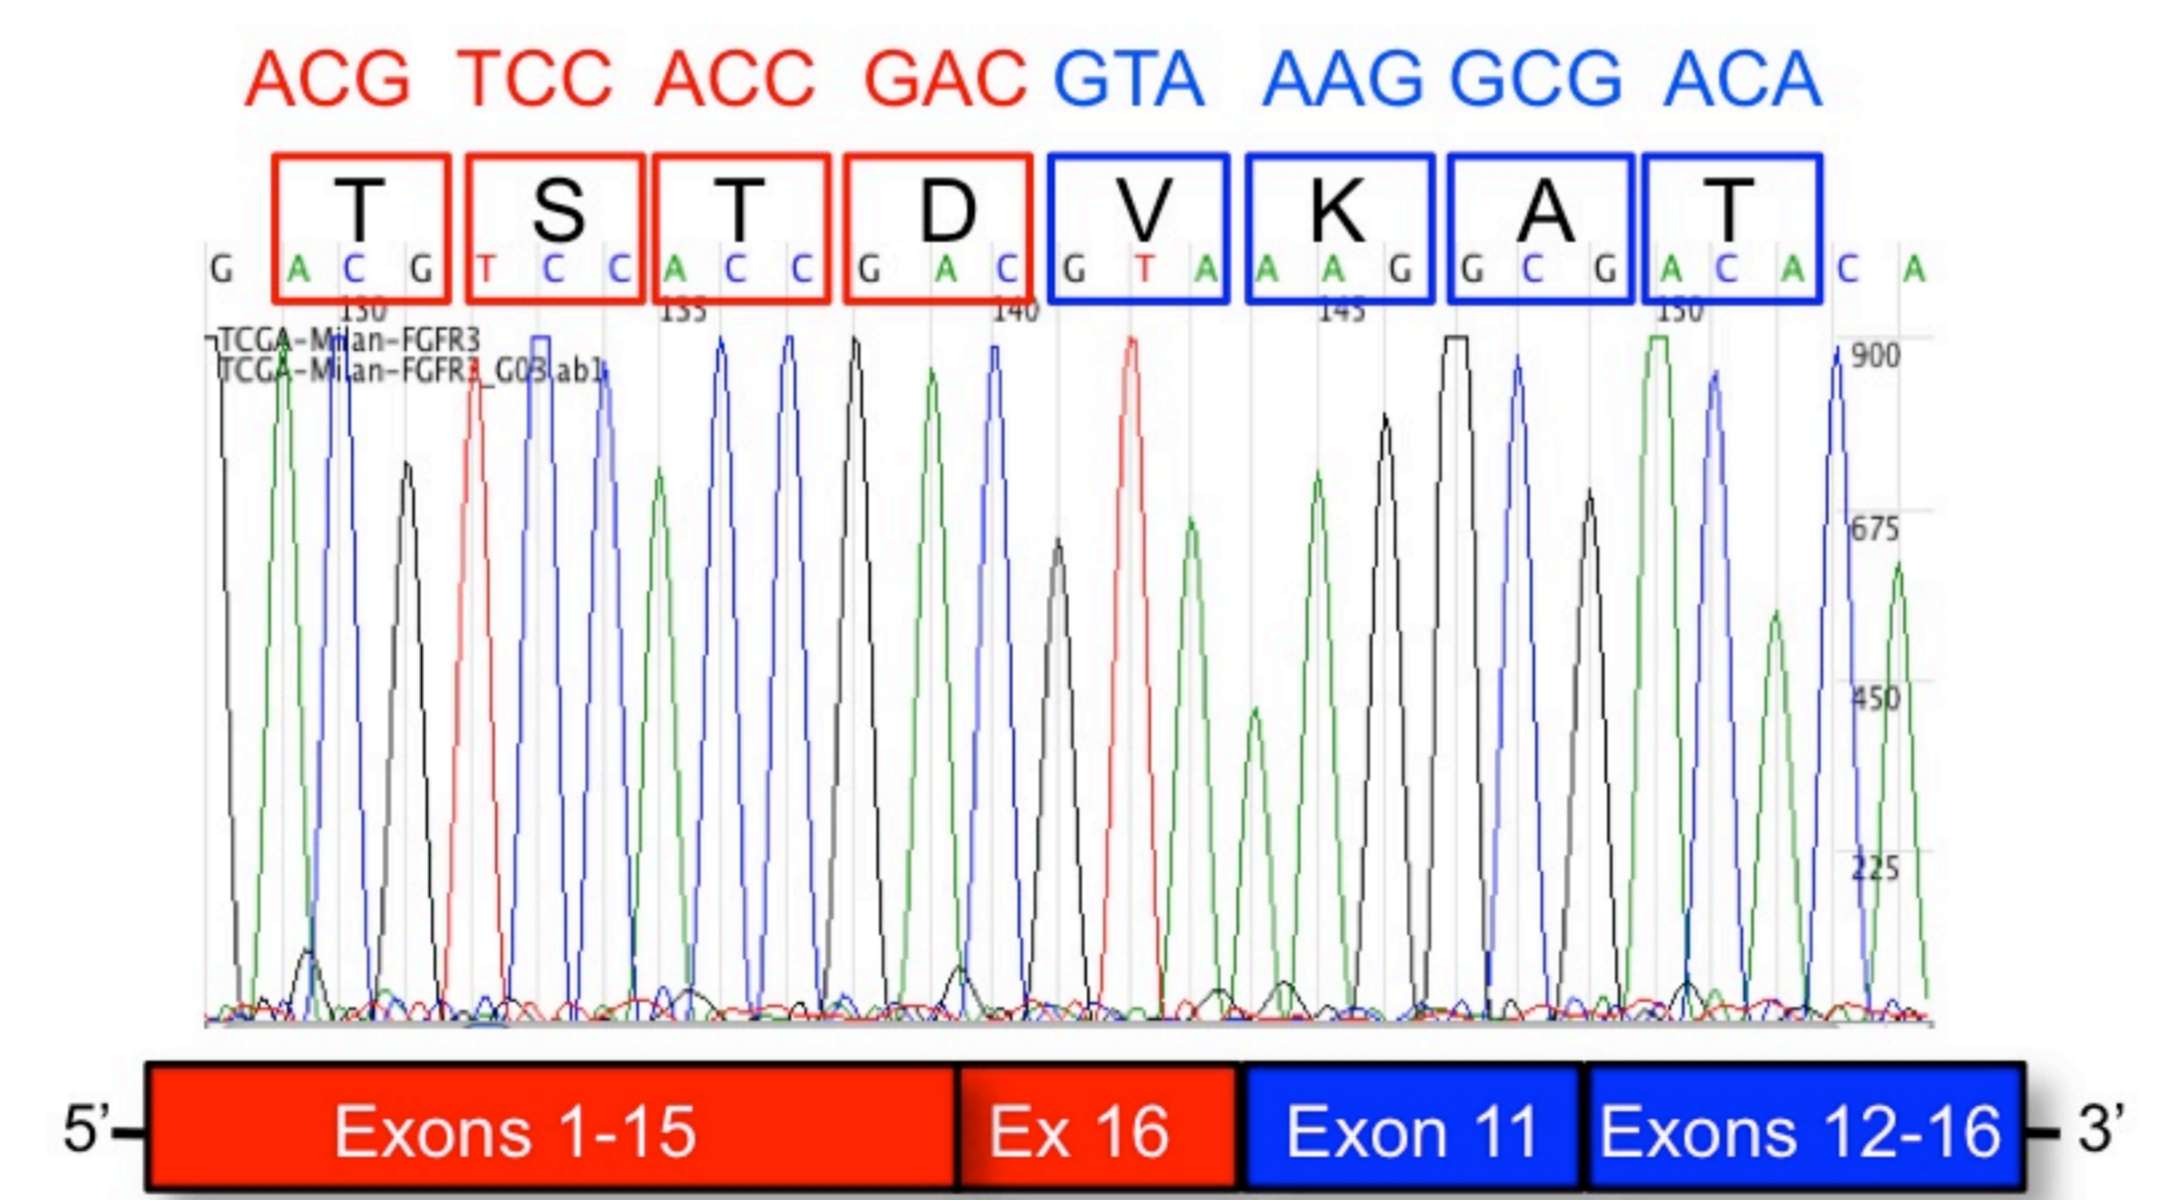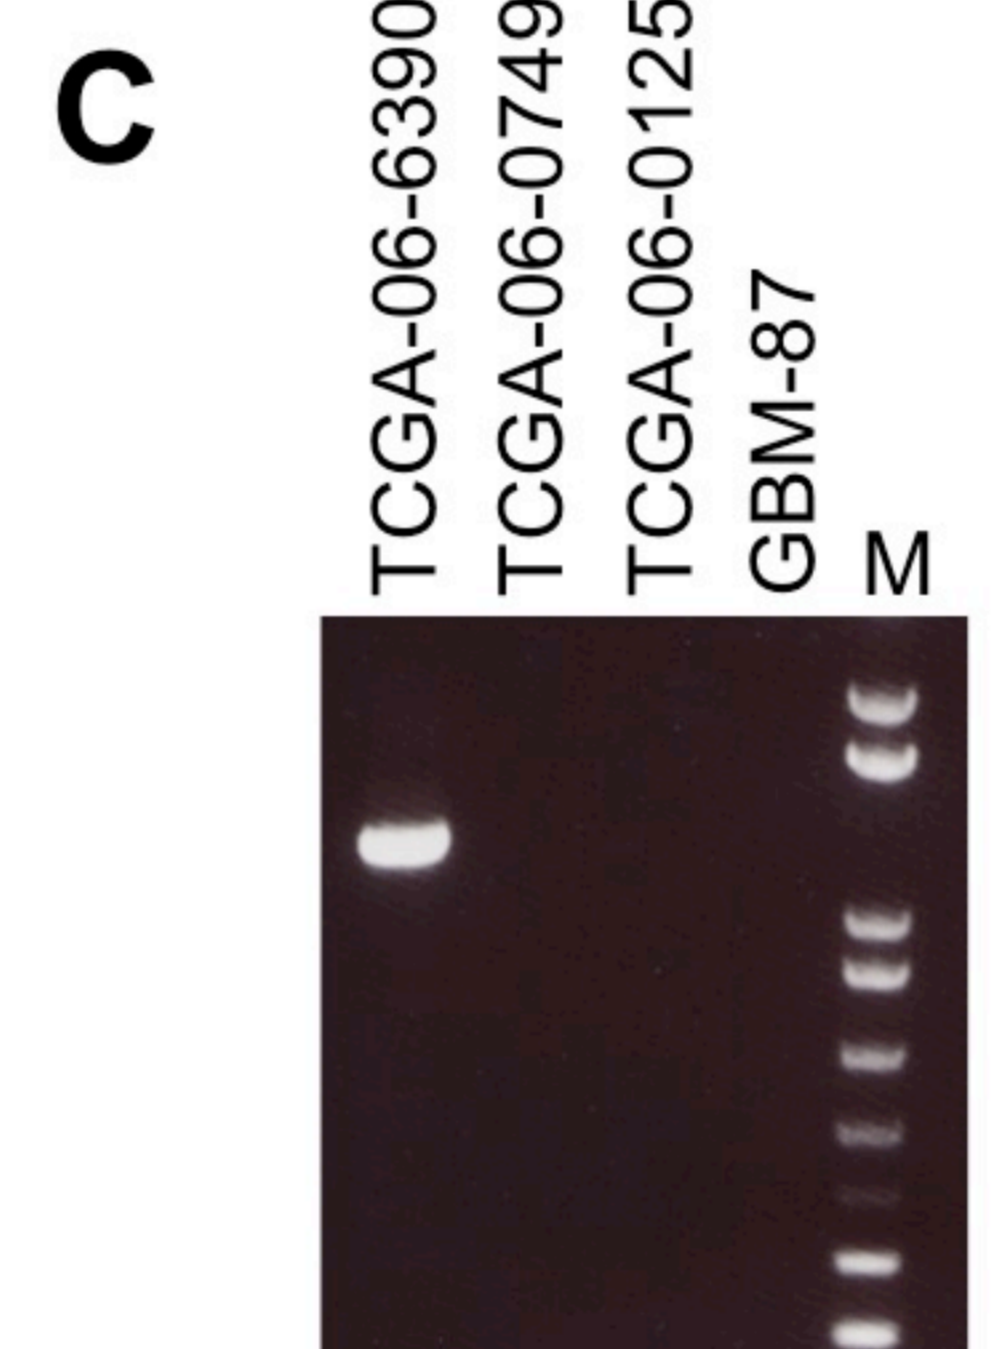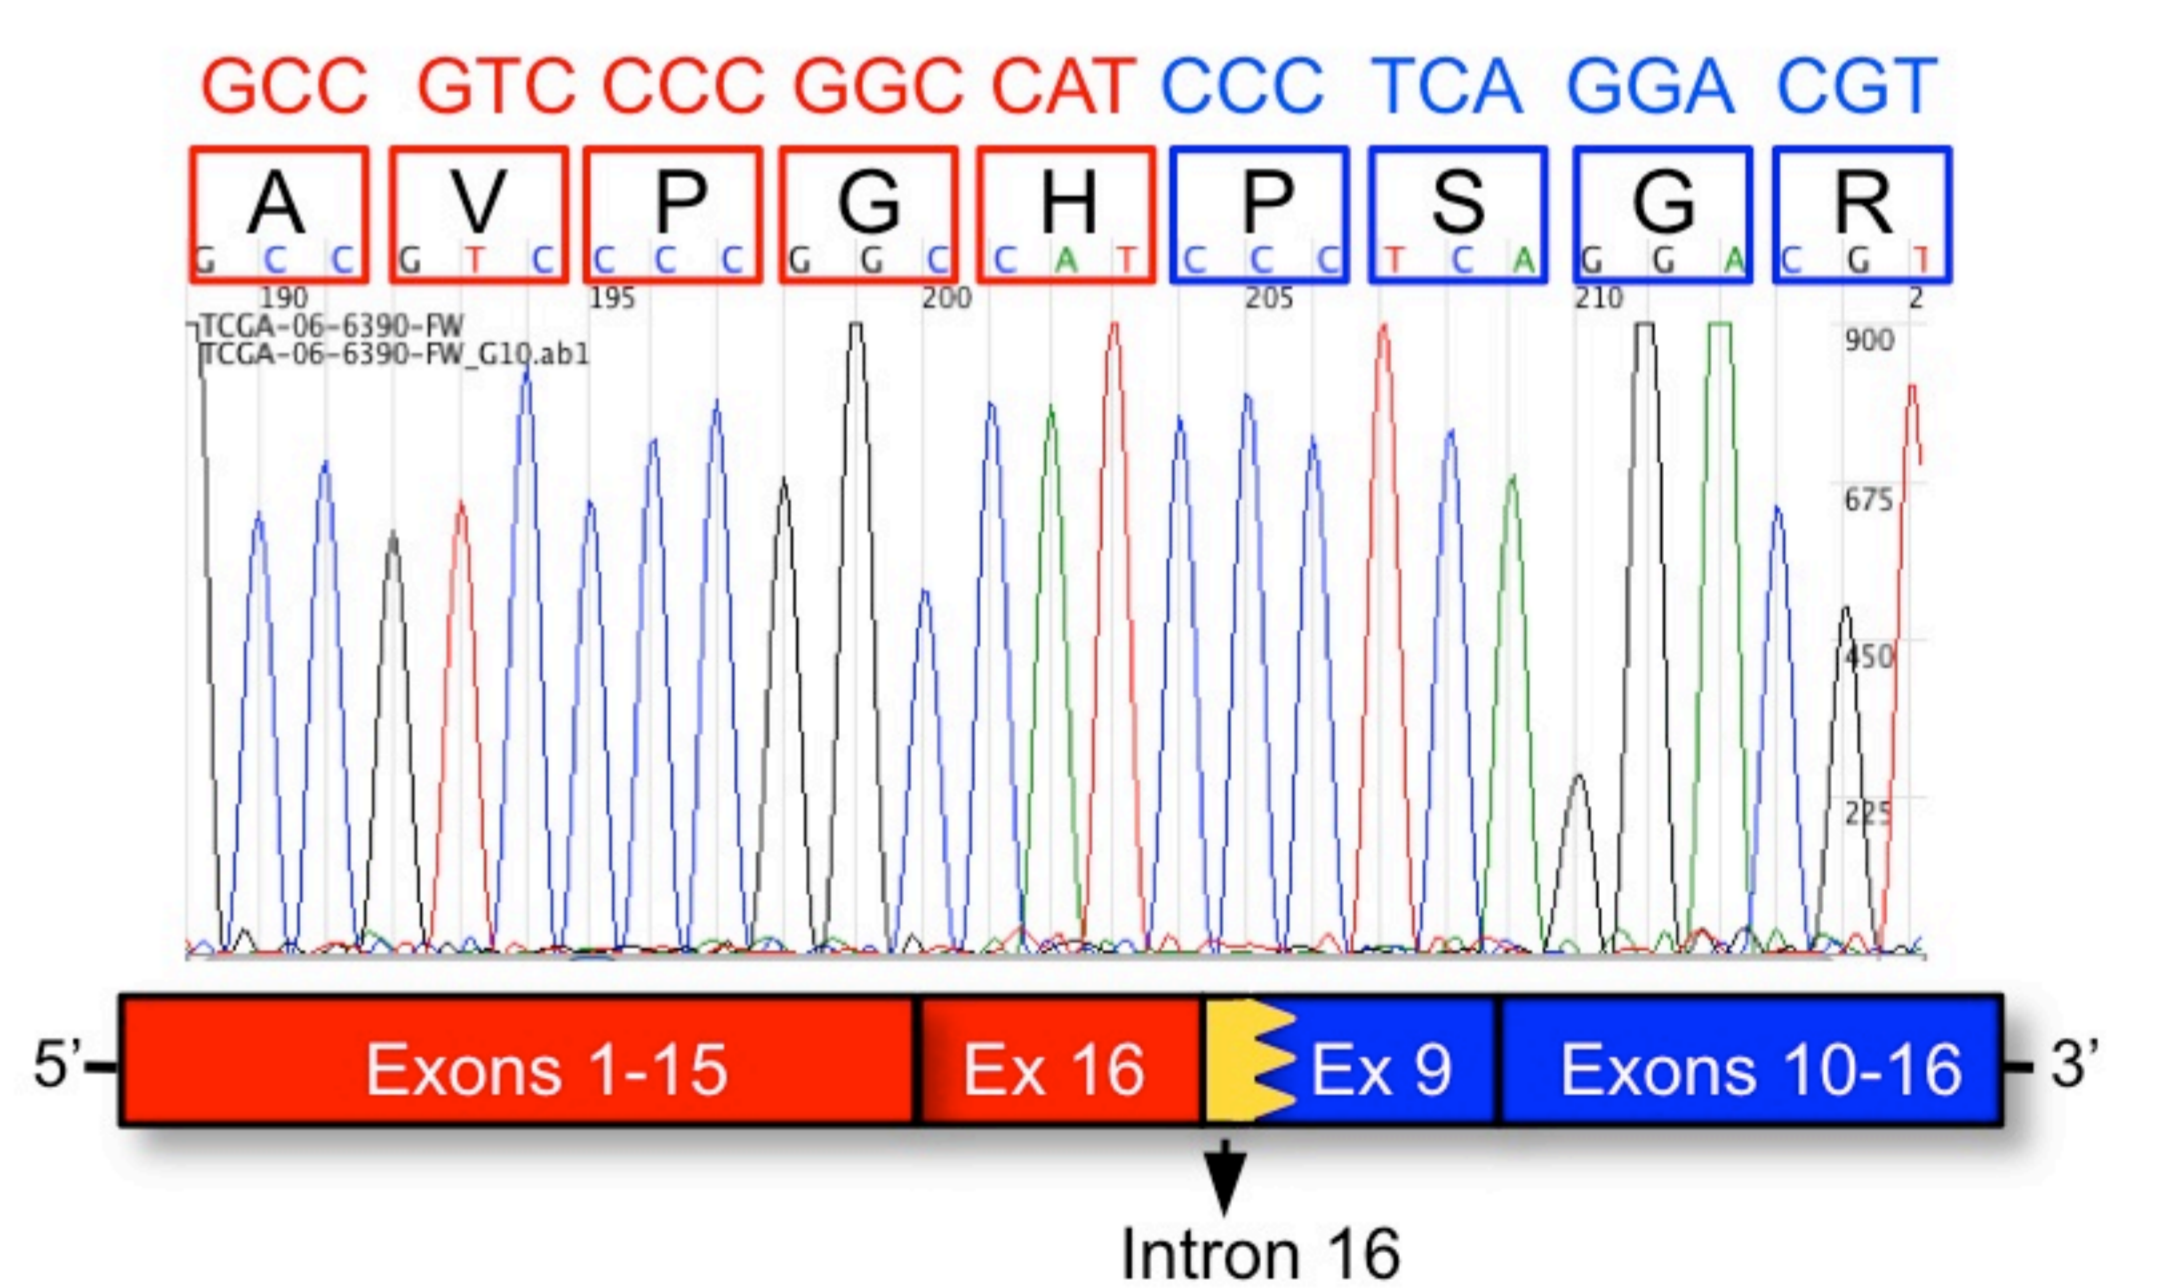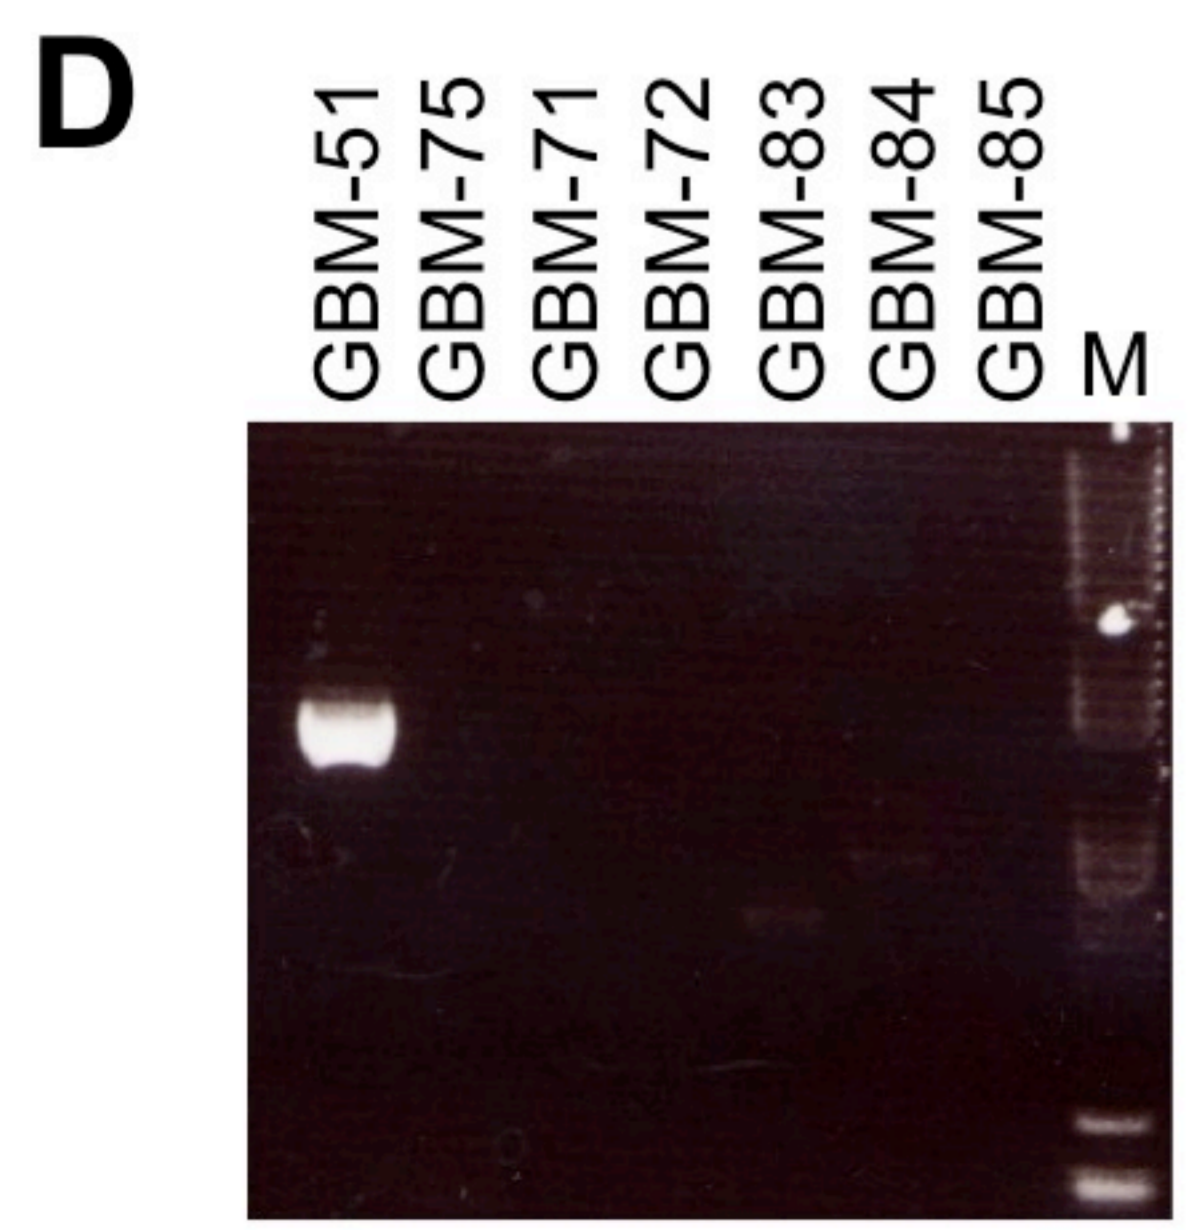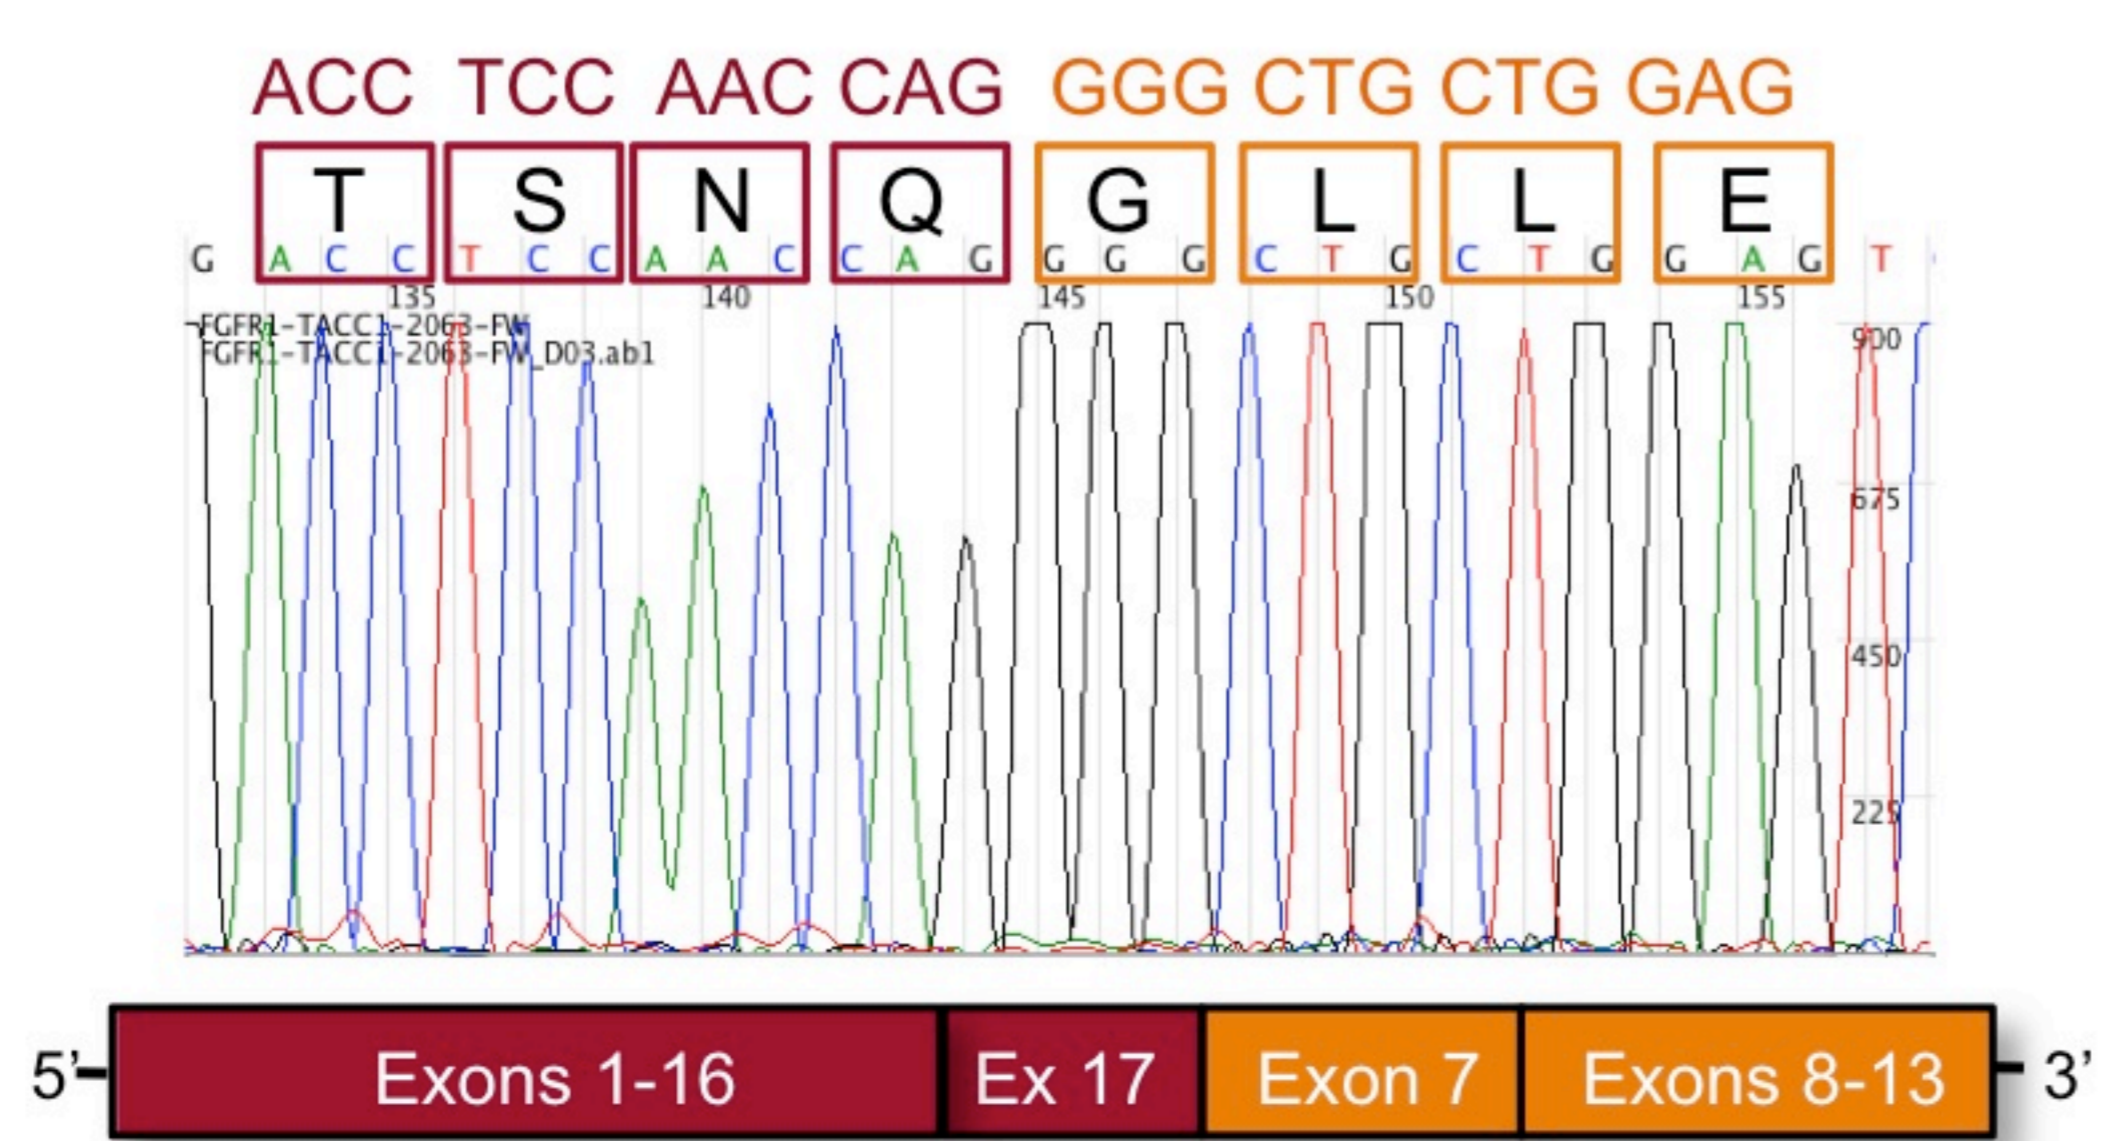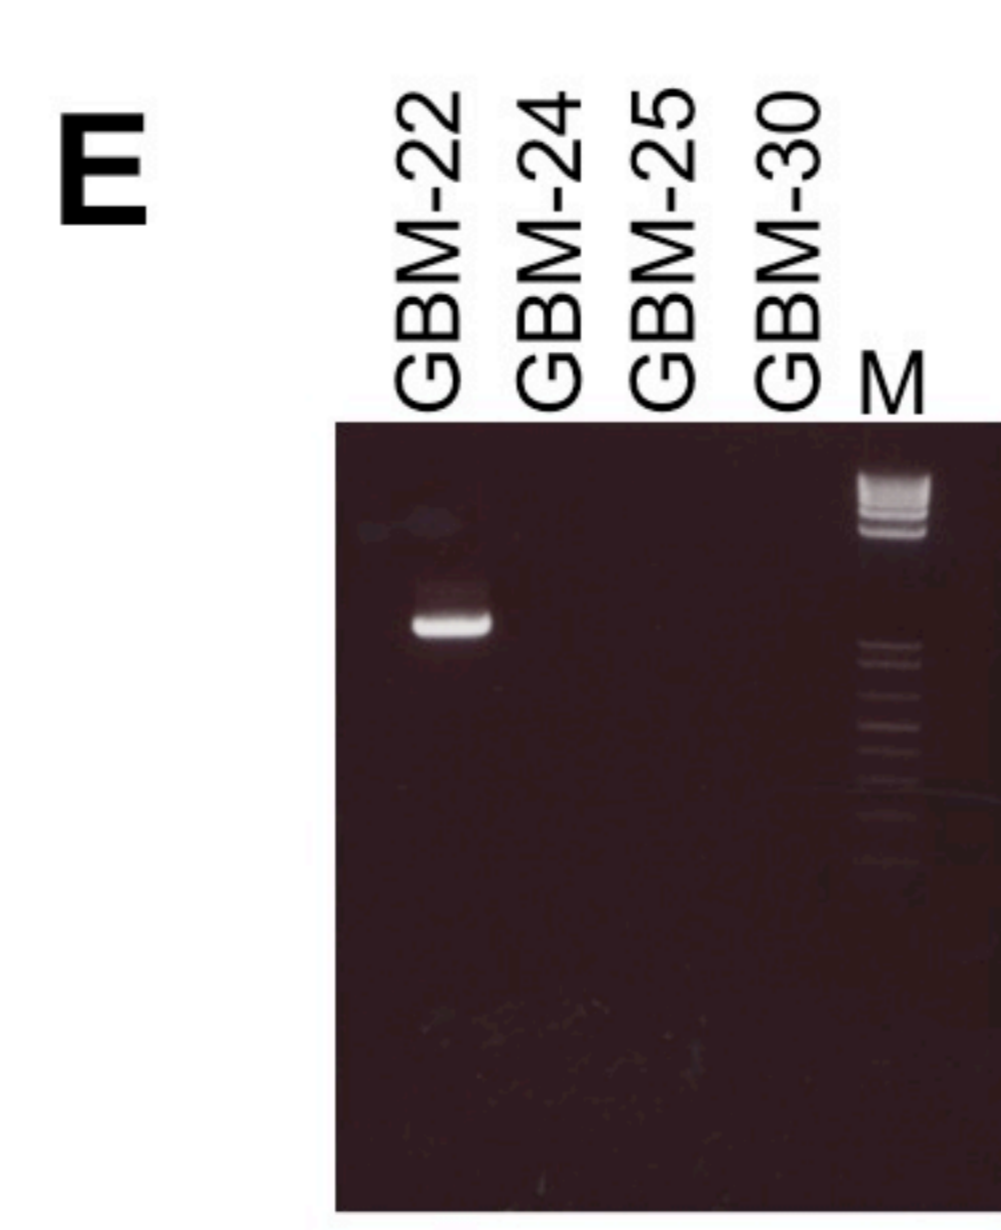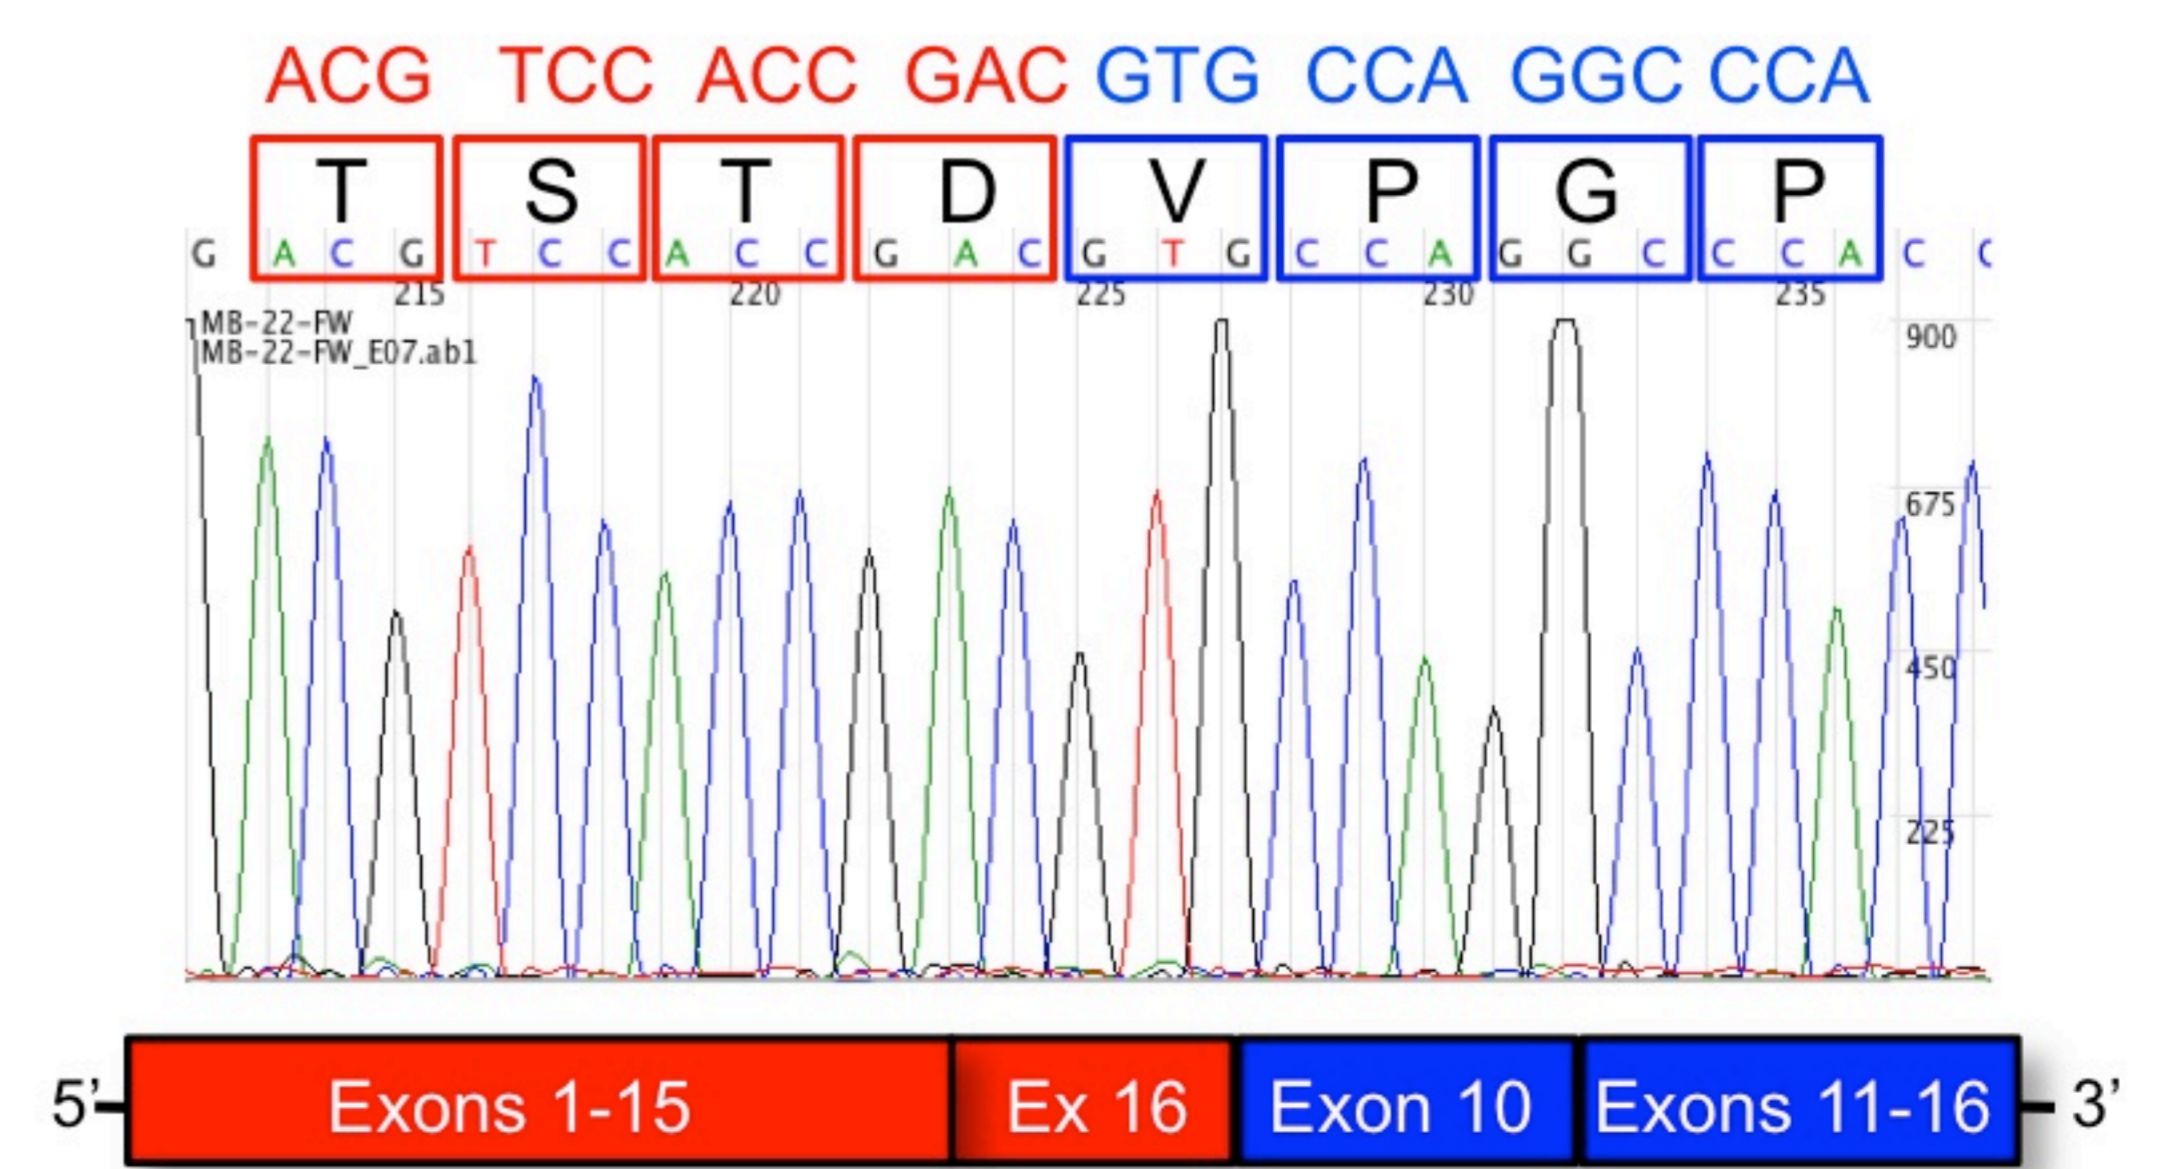

Figure S4



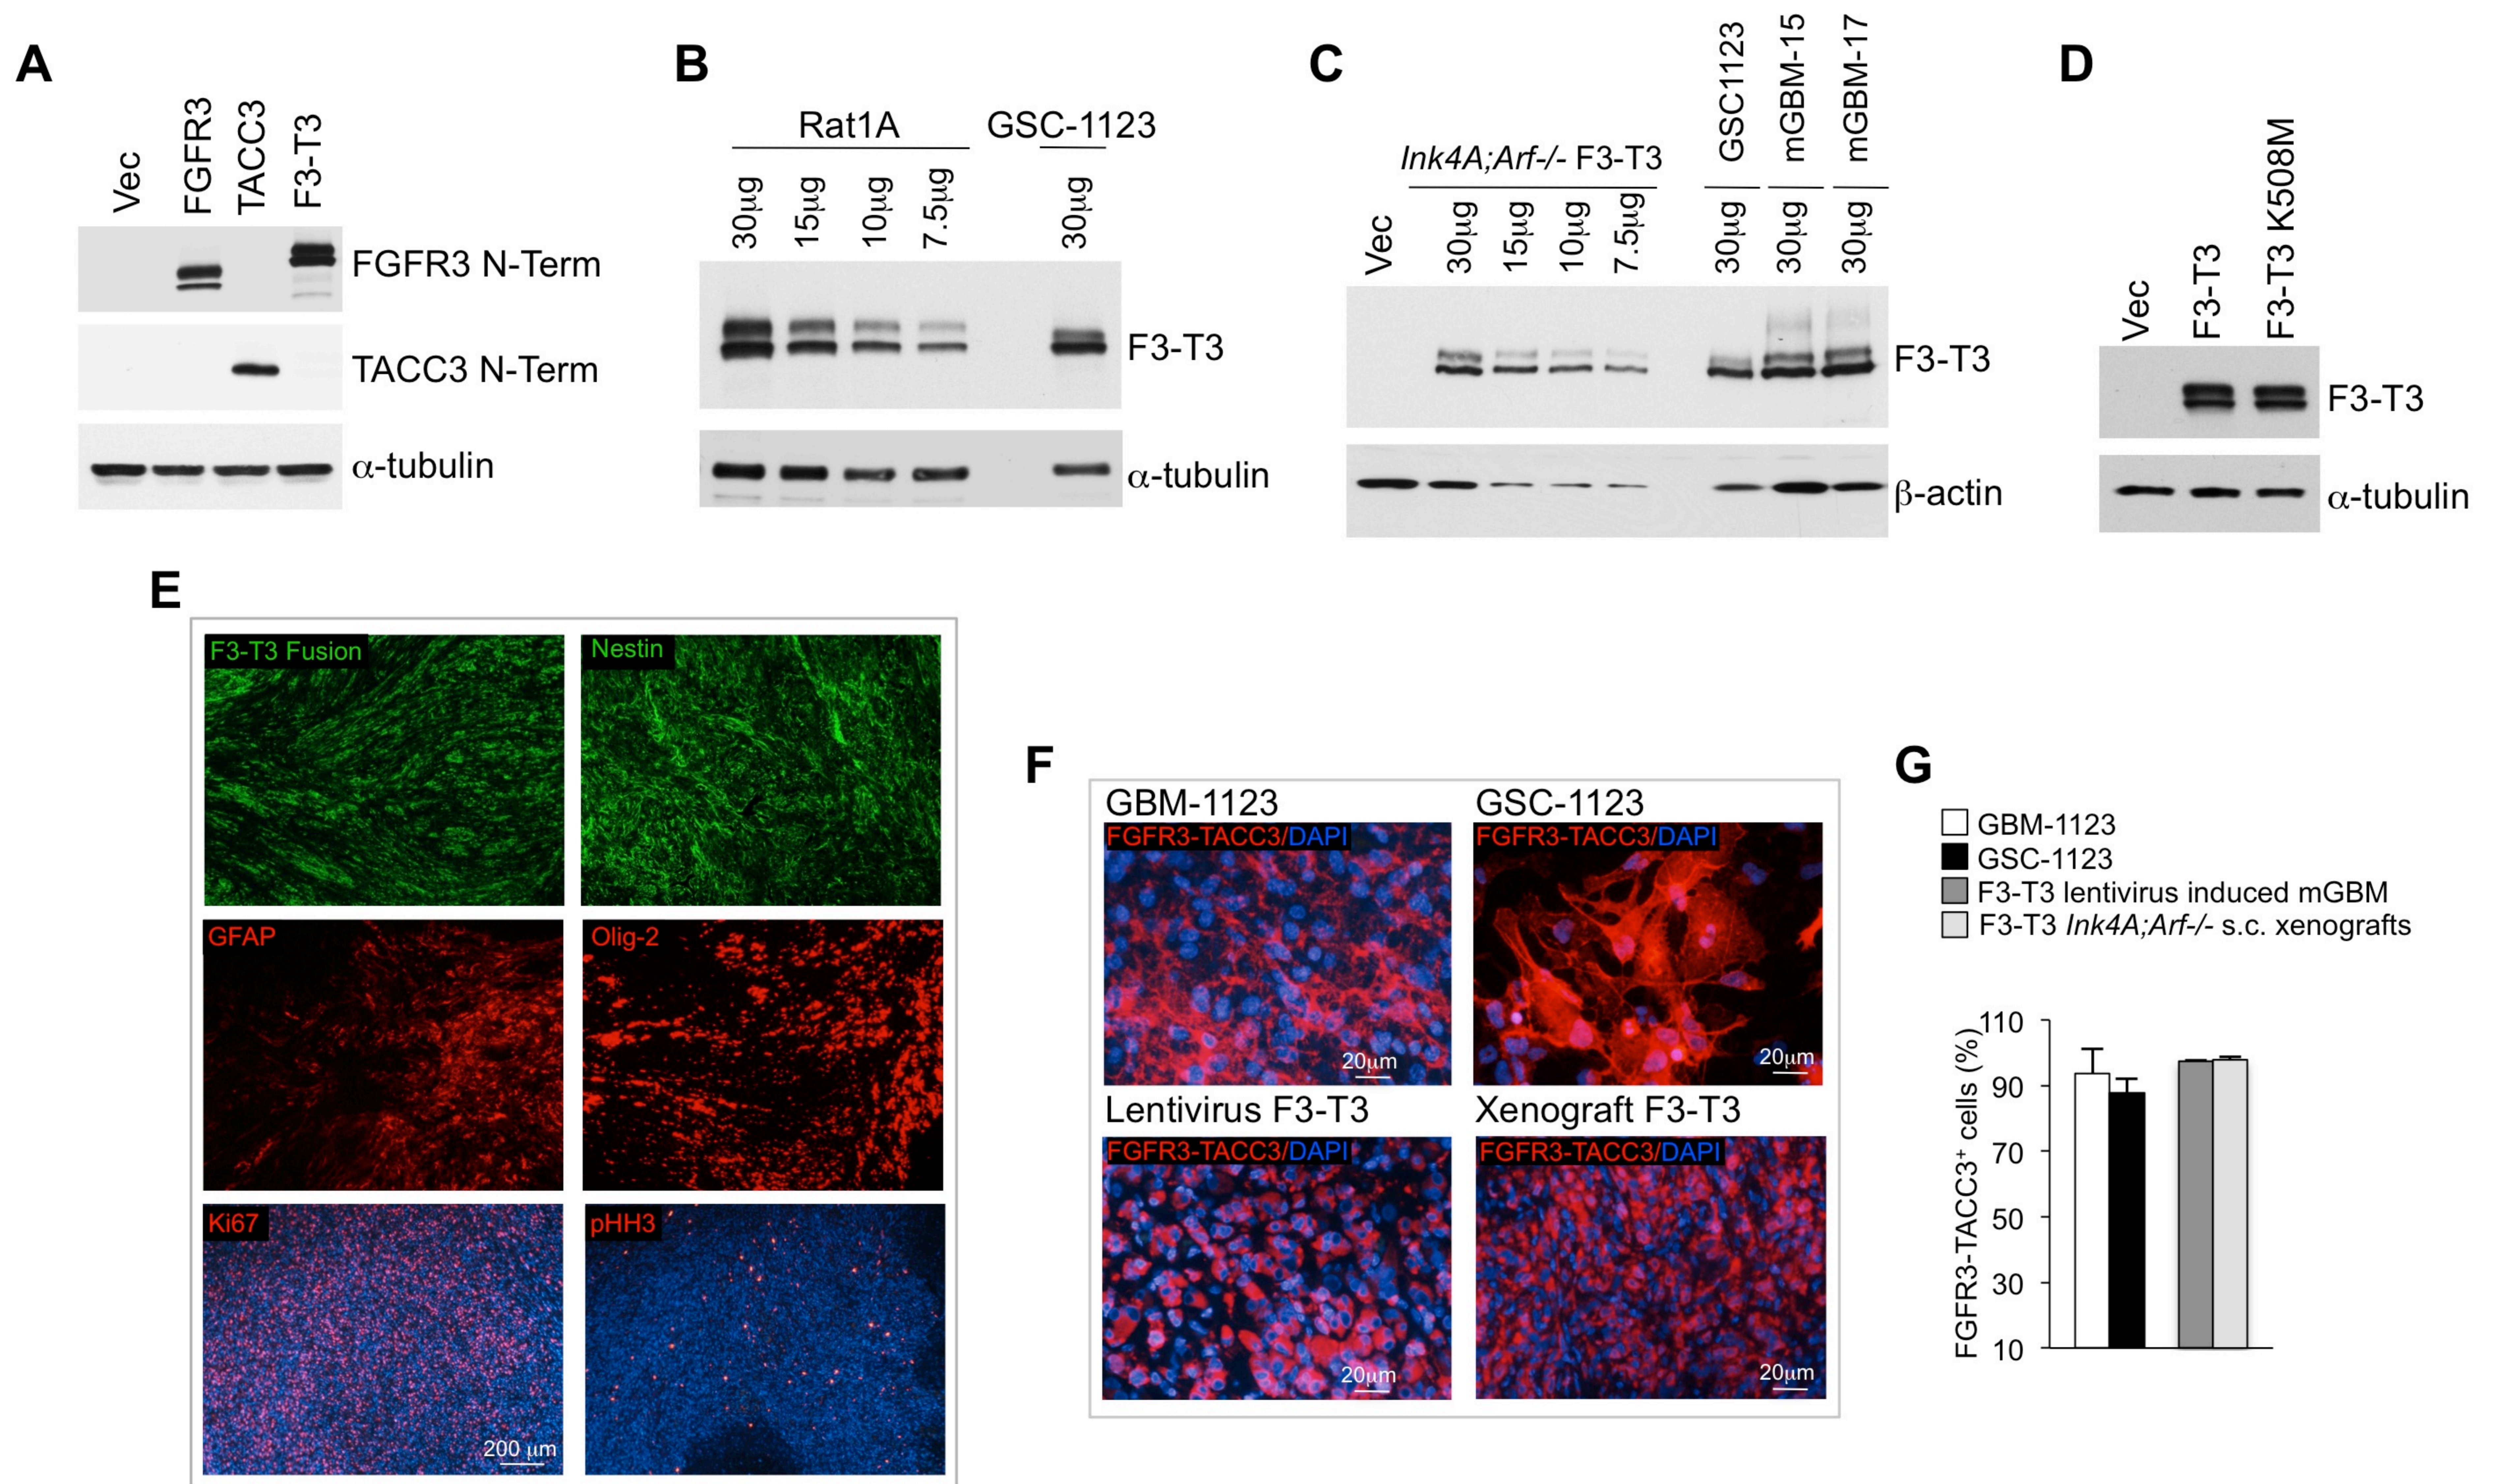

Figure S5

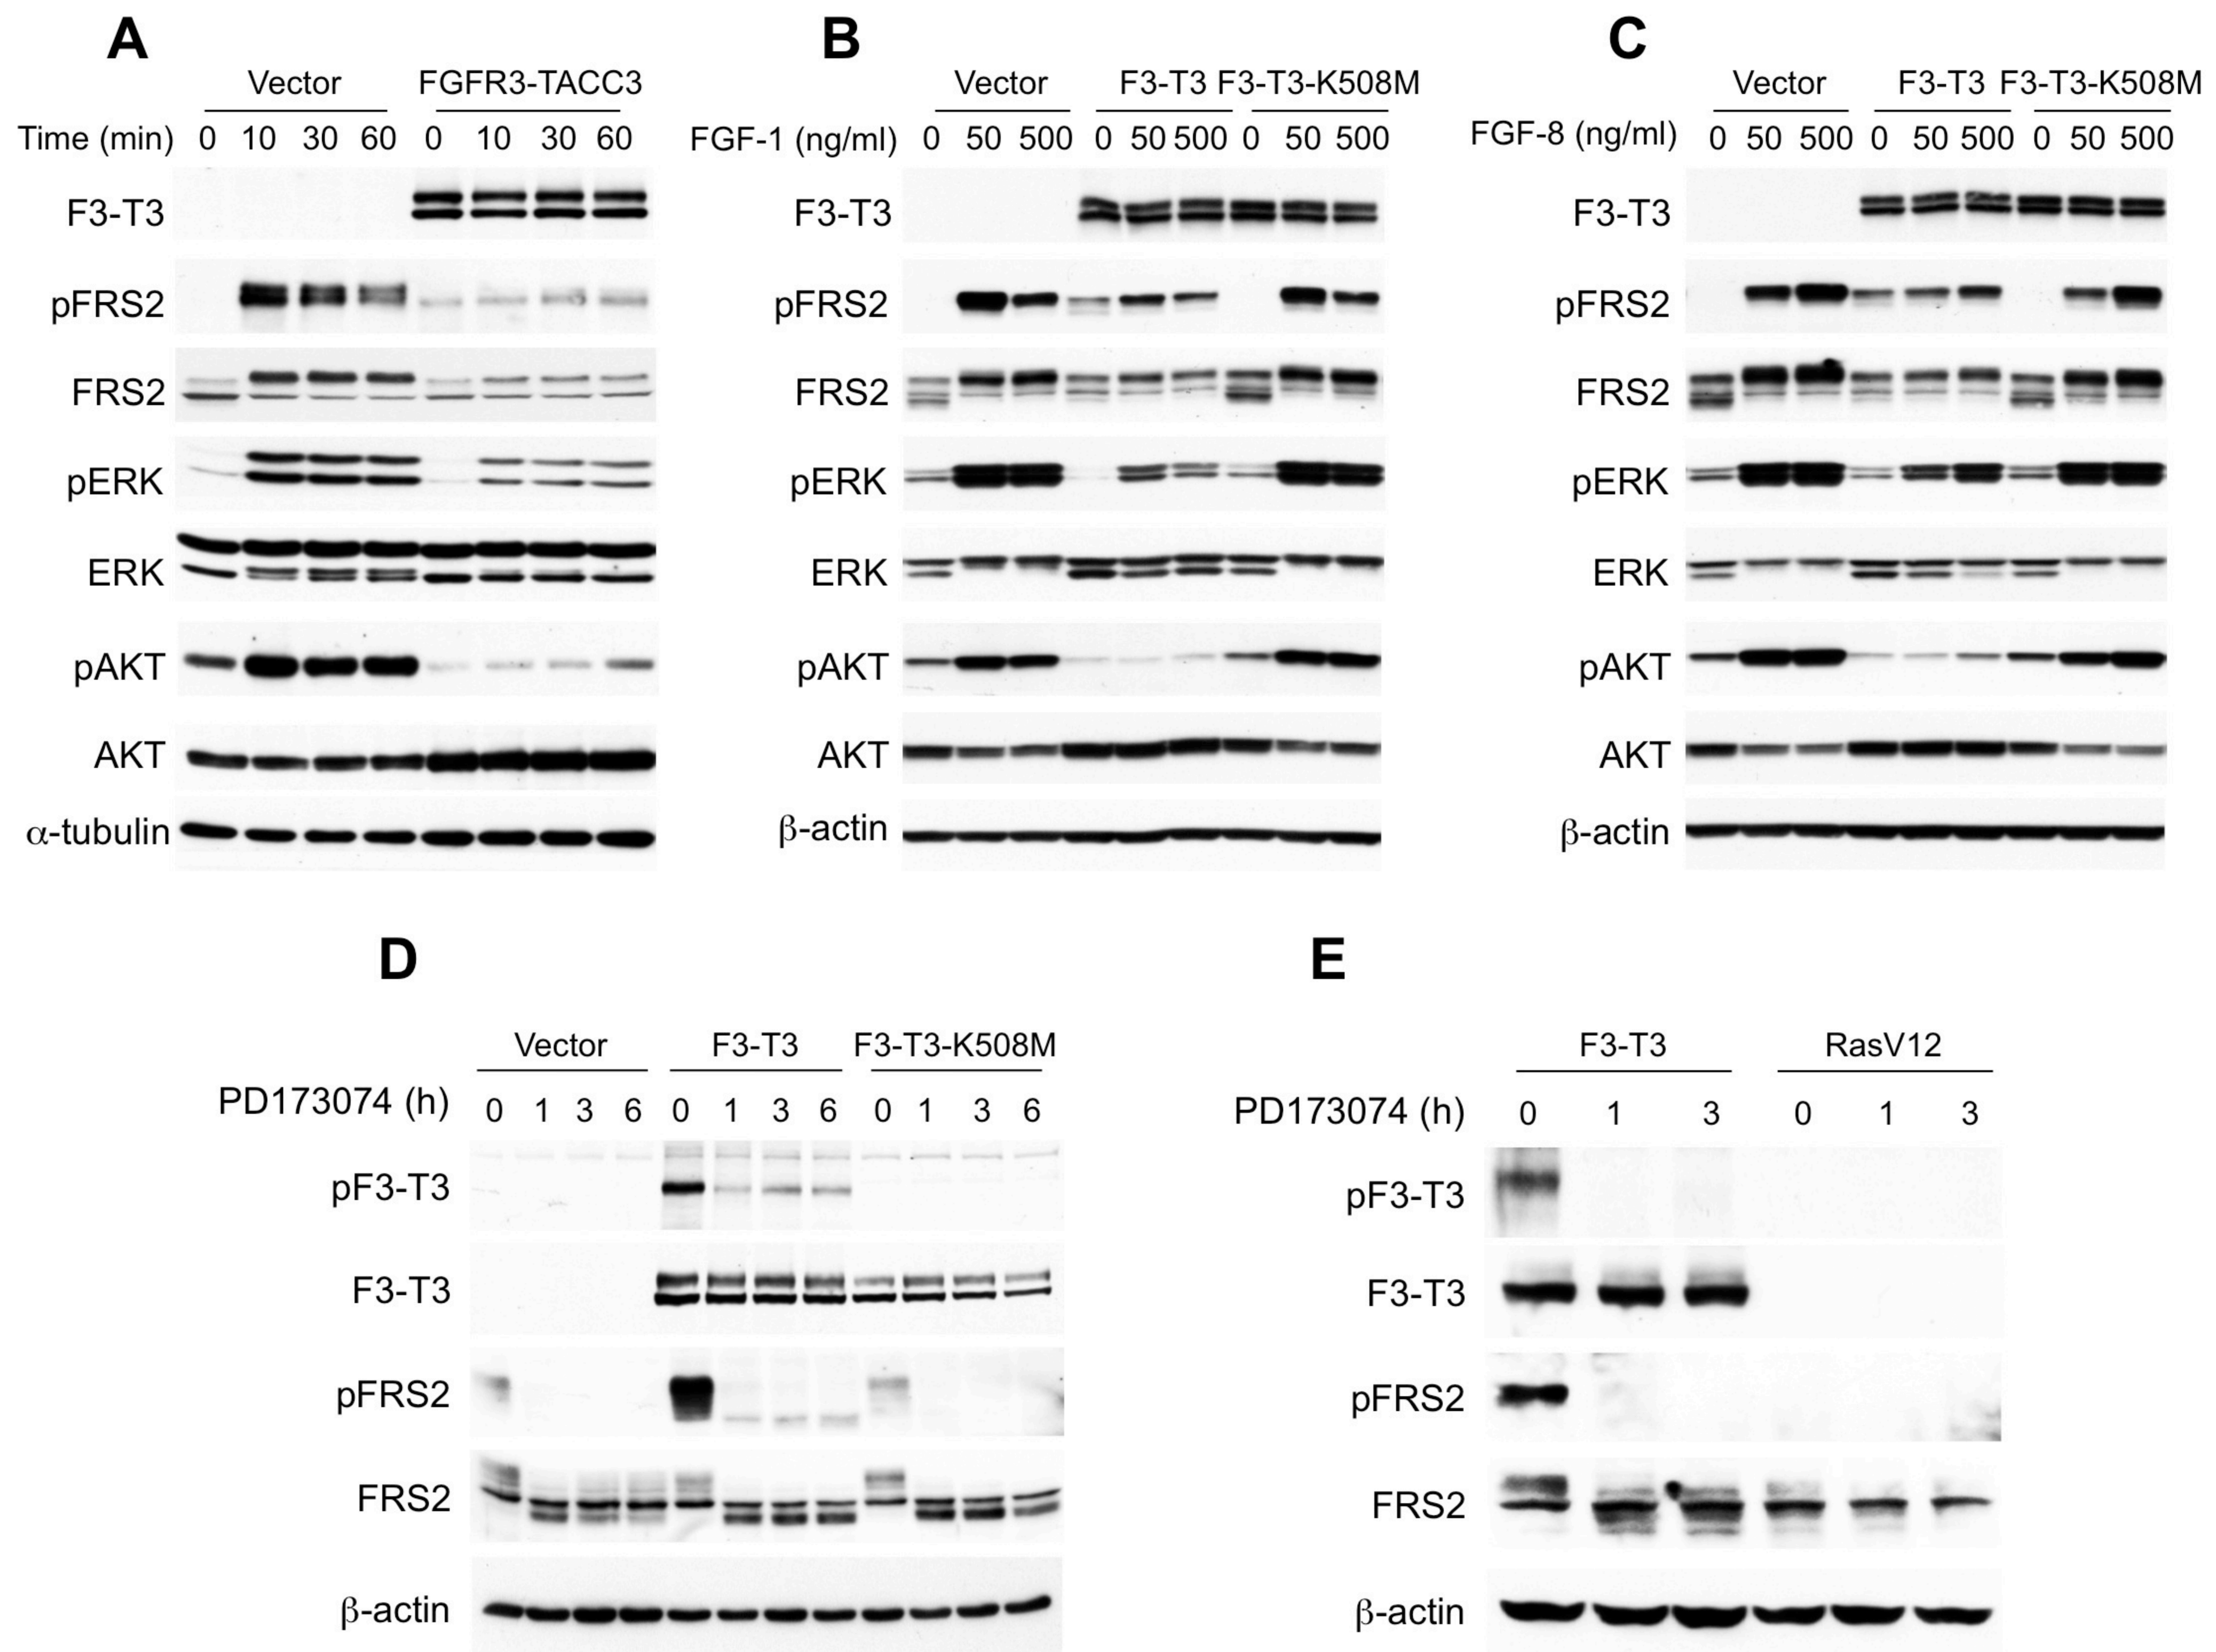

Figure S6

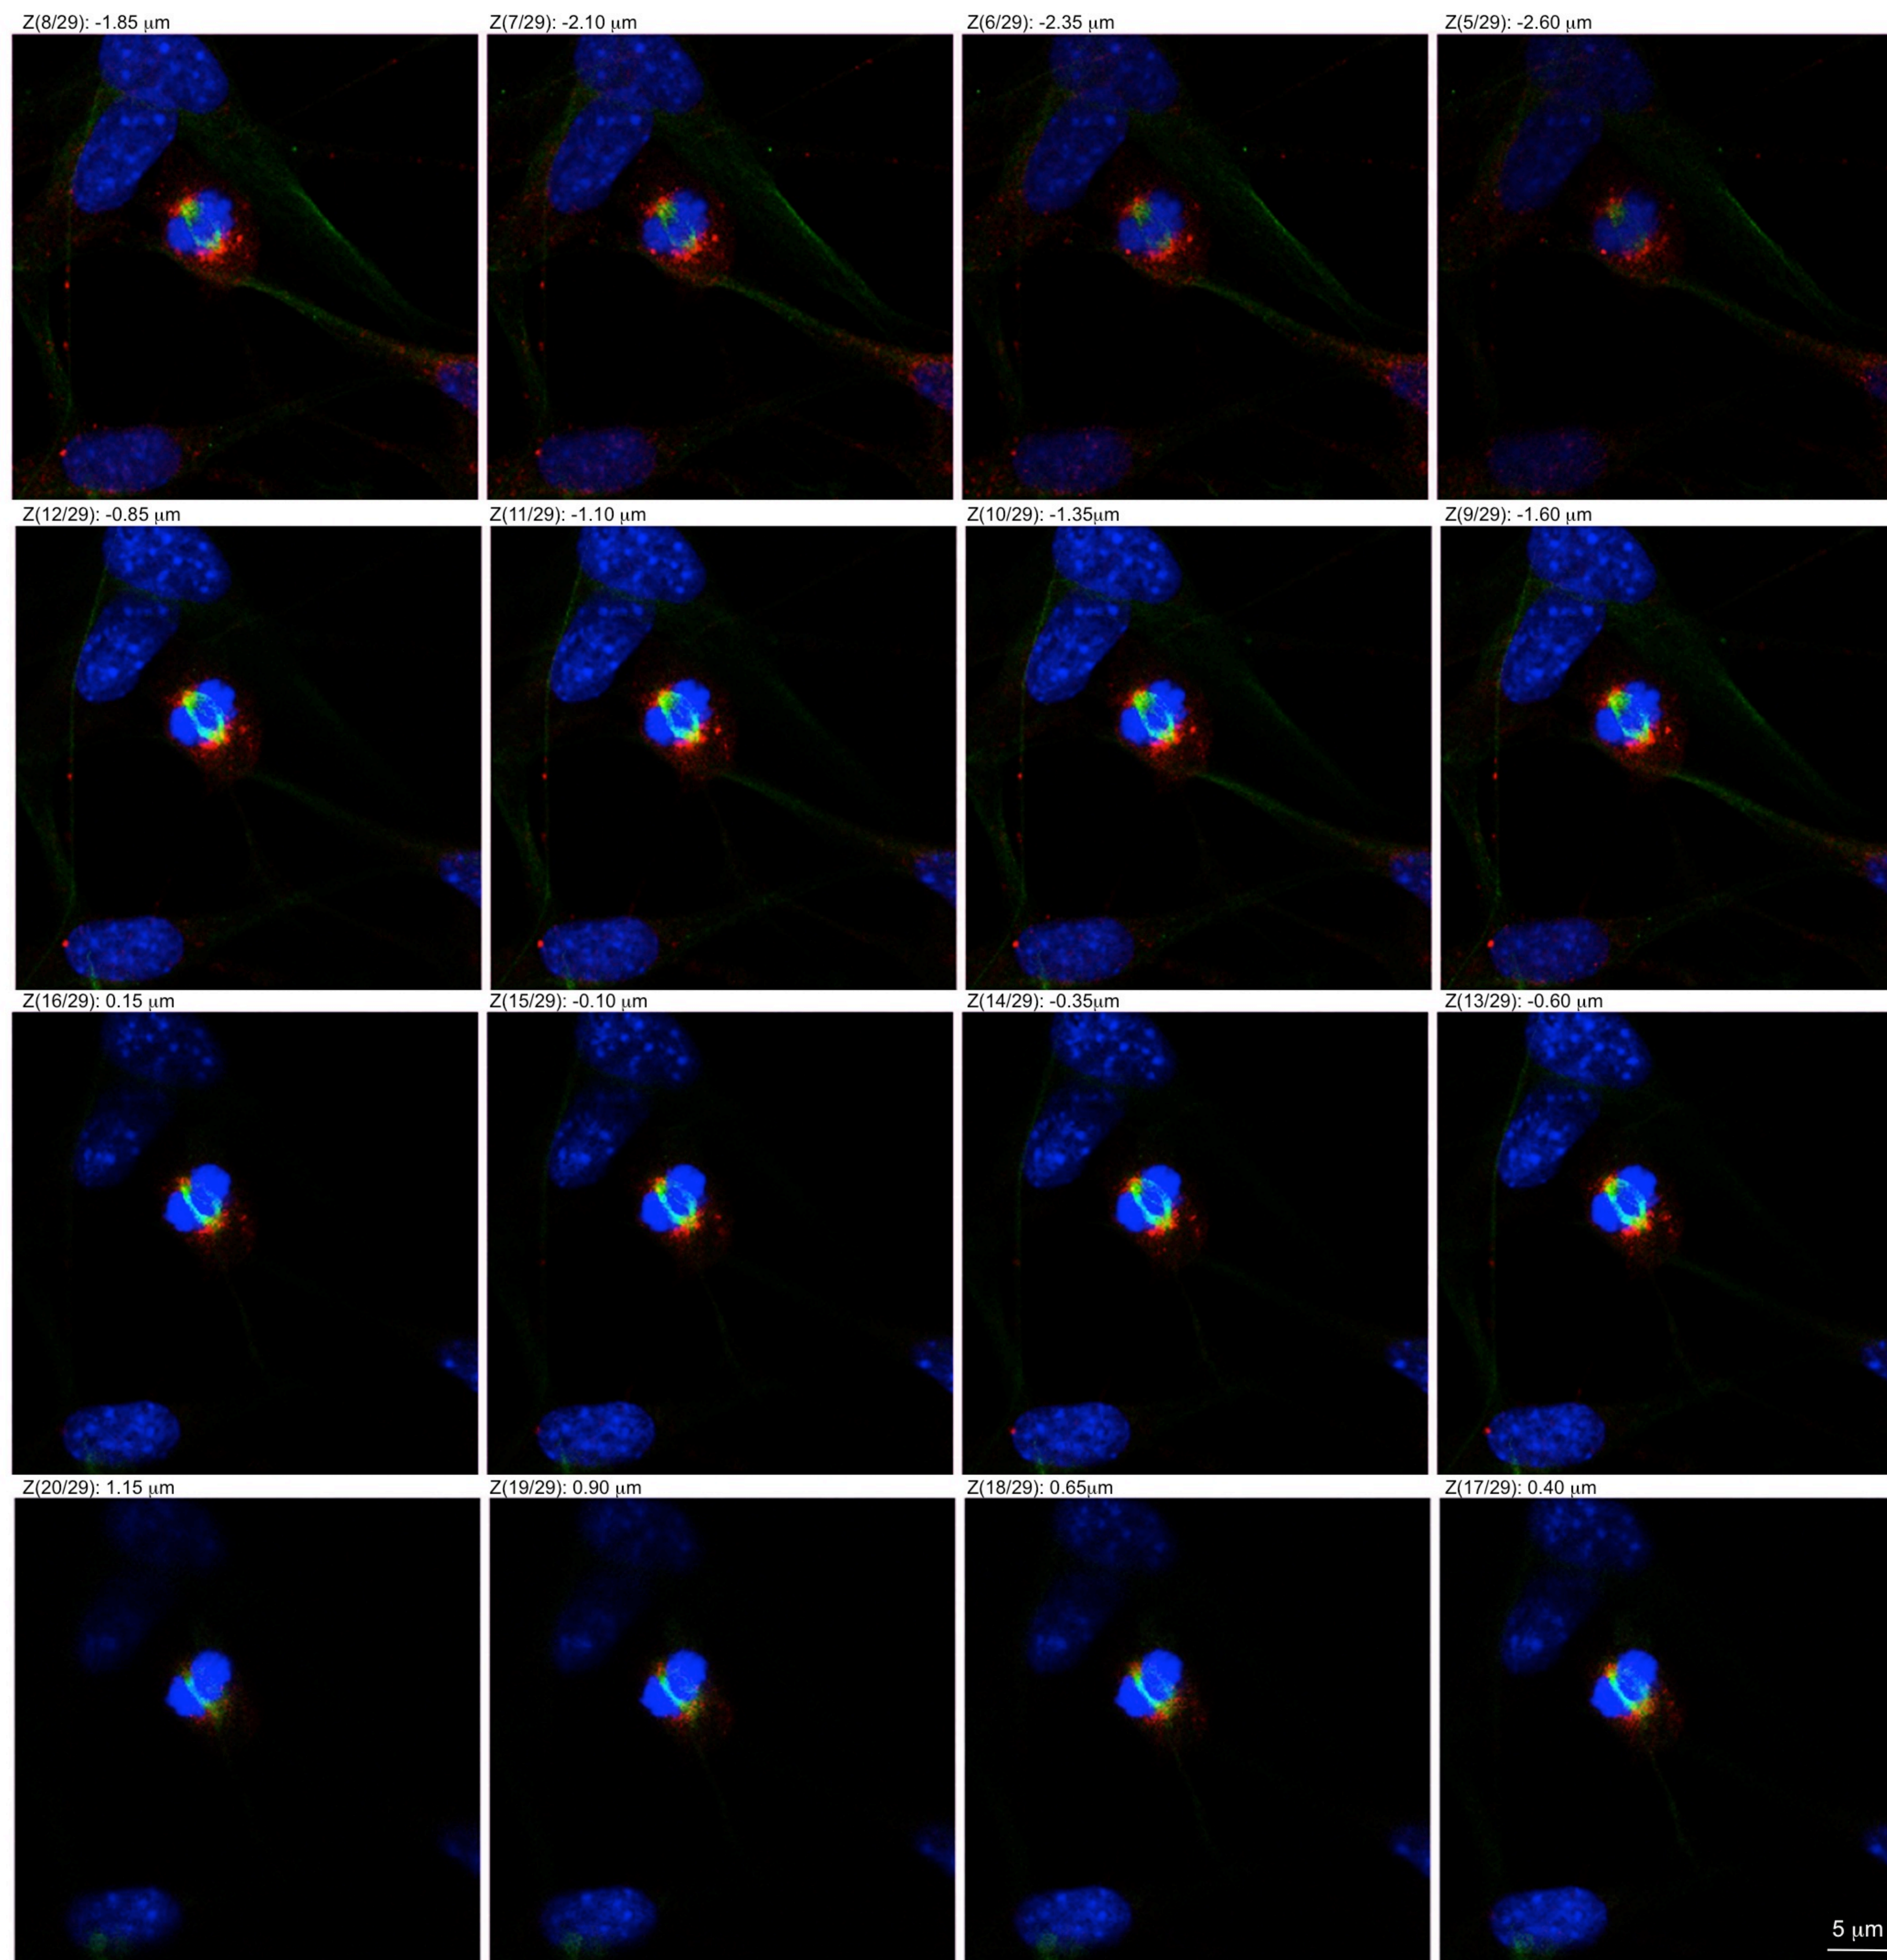

Figure S7

**A**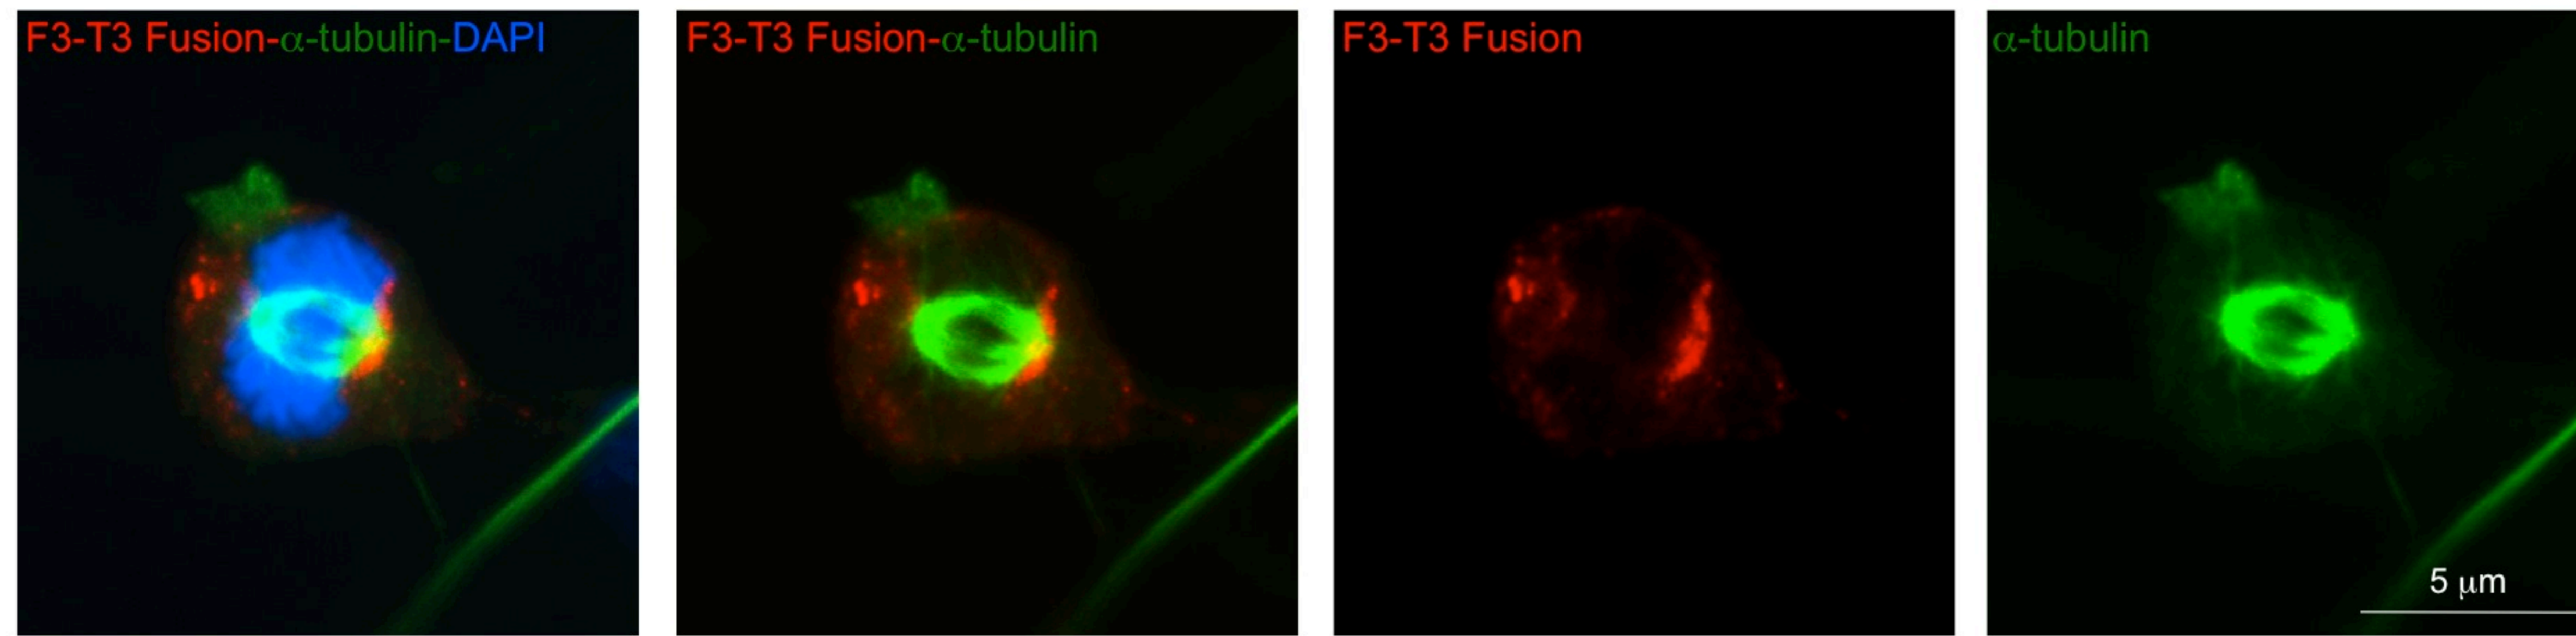**B**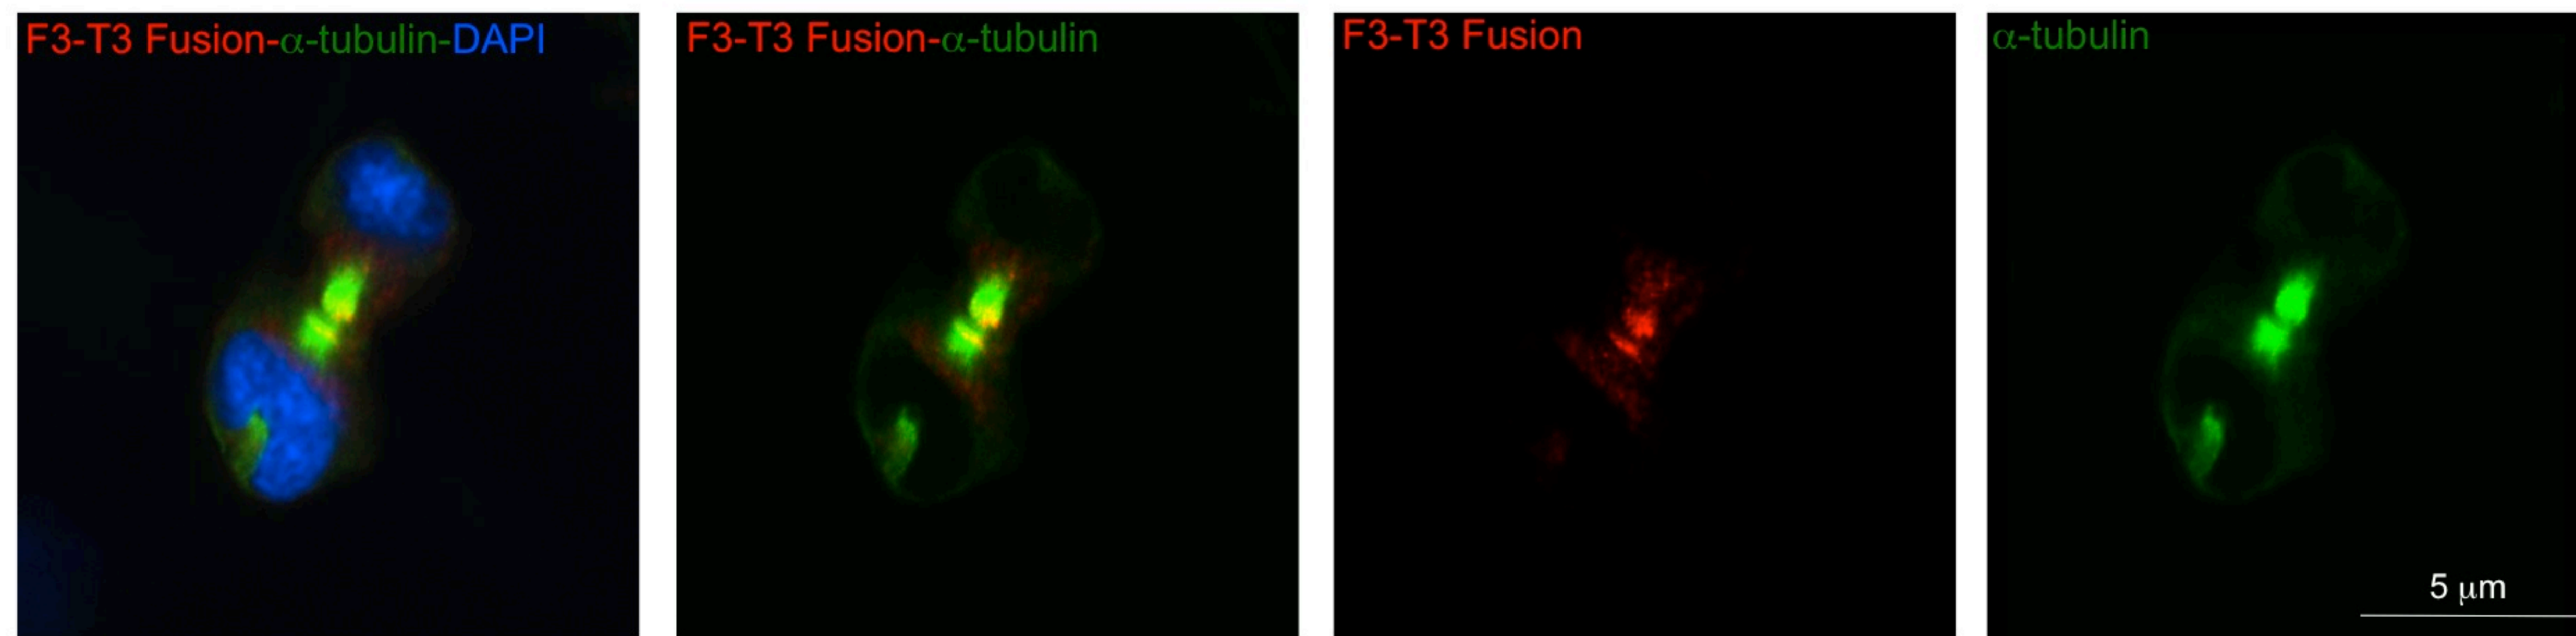**C**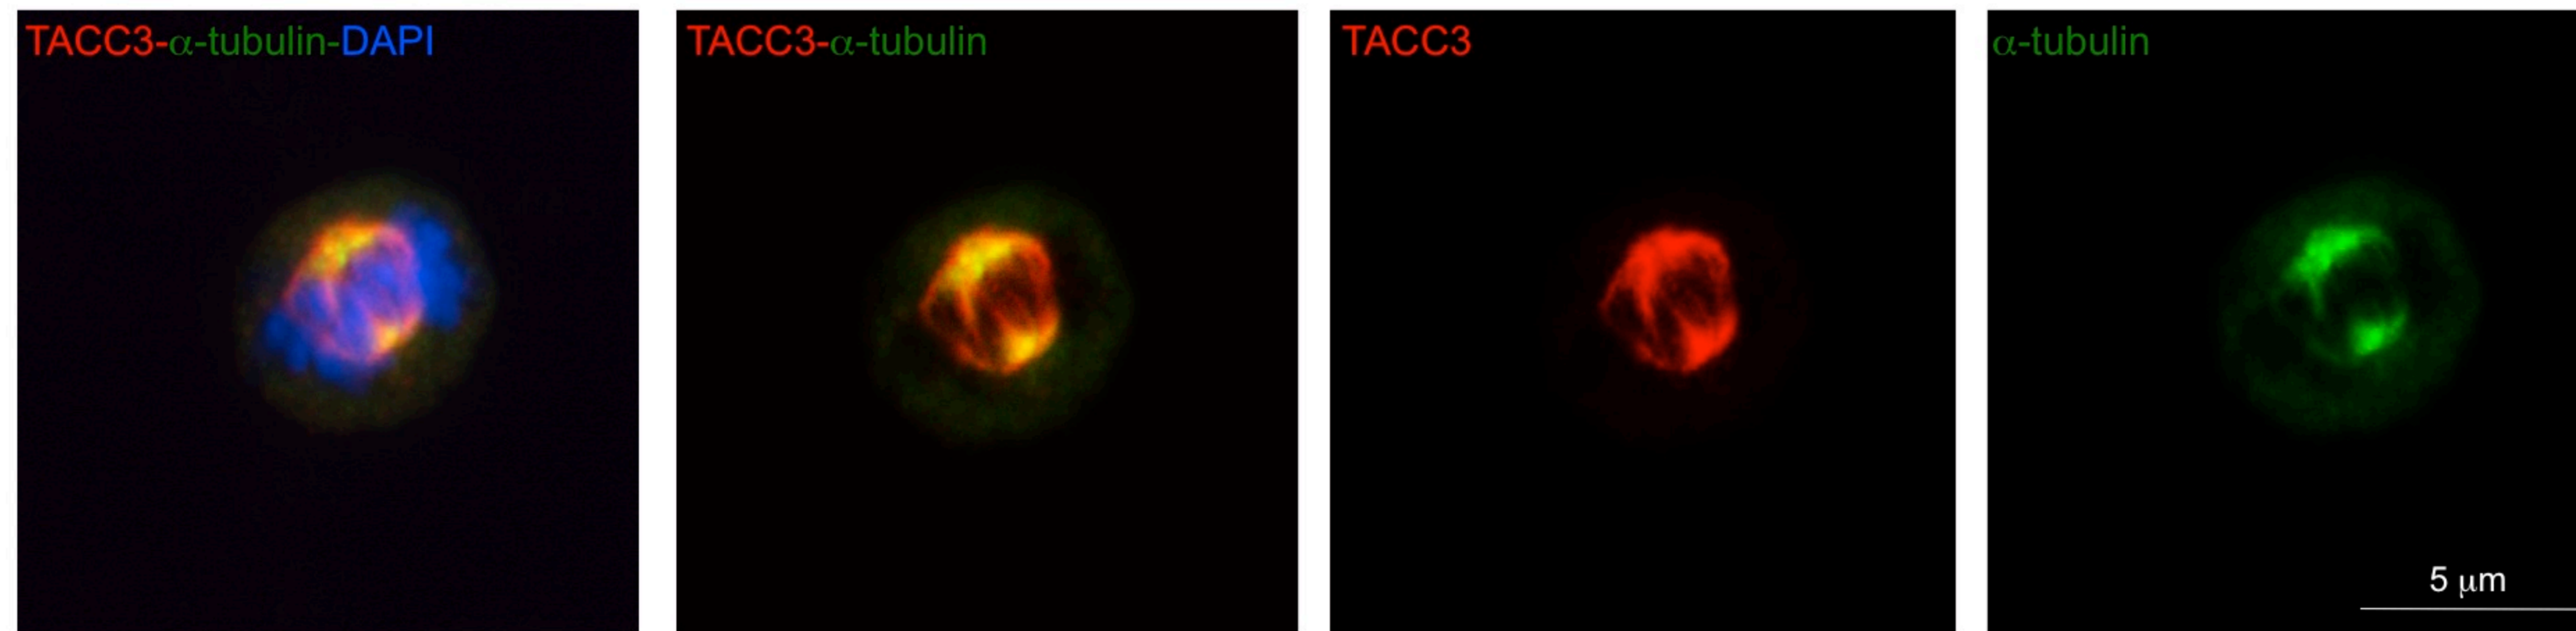**D**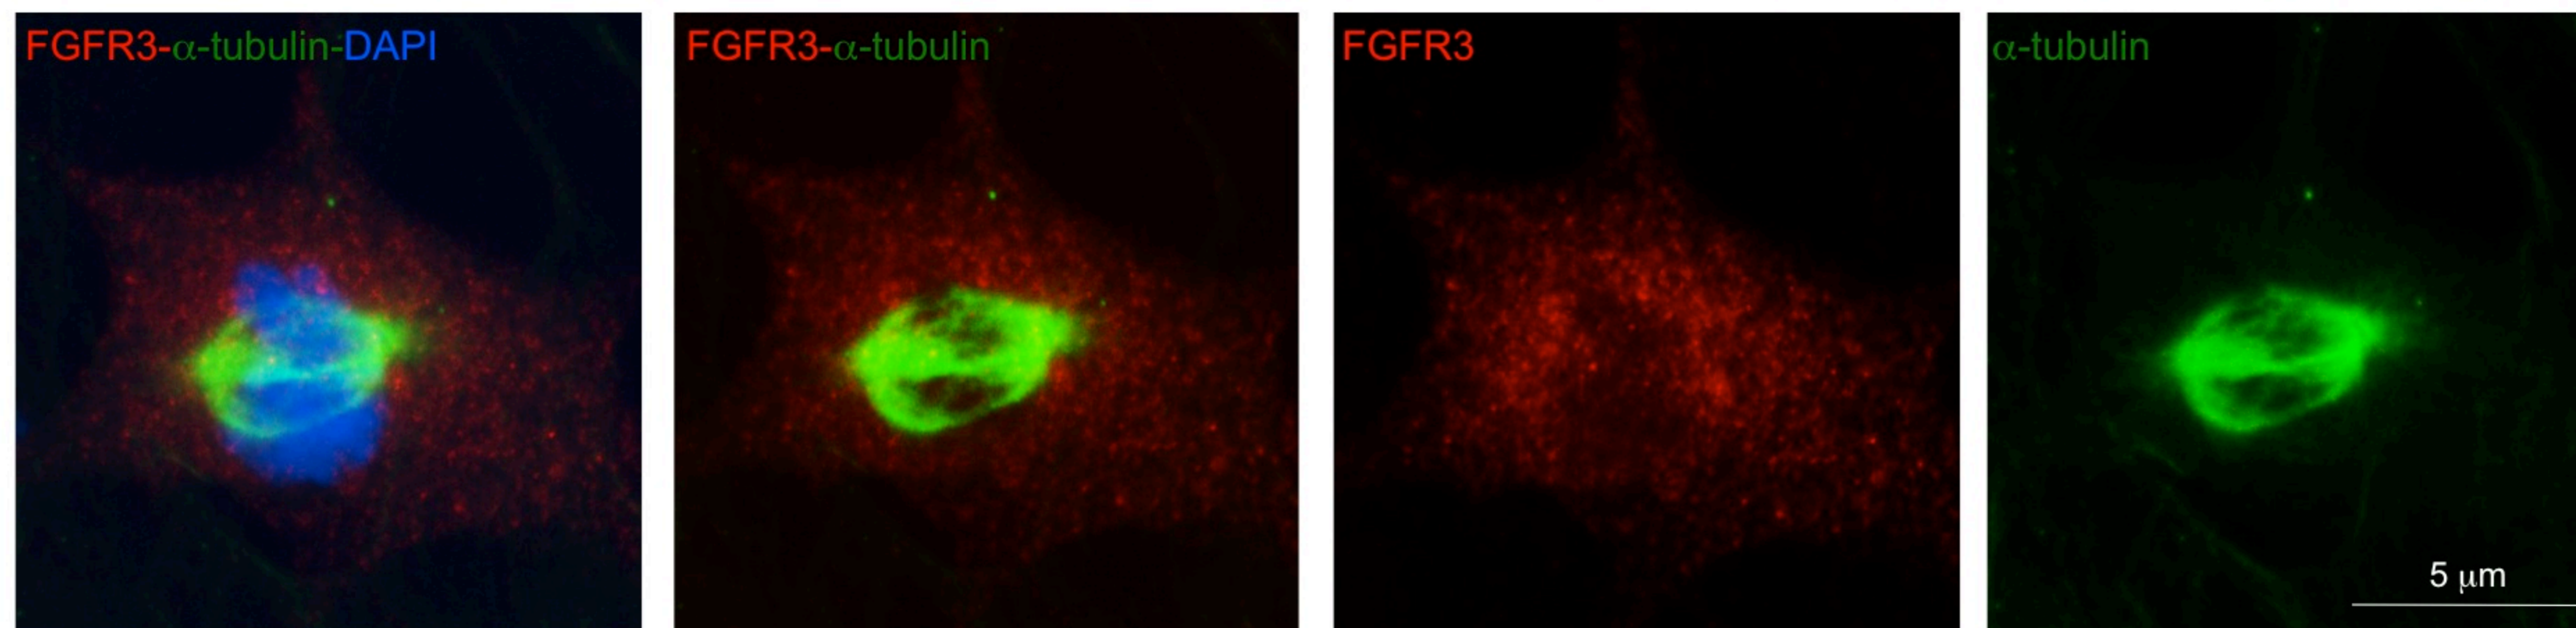

Figure S8

**A**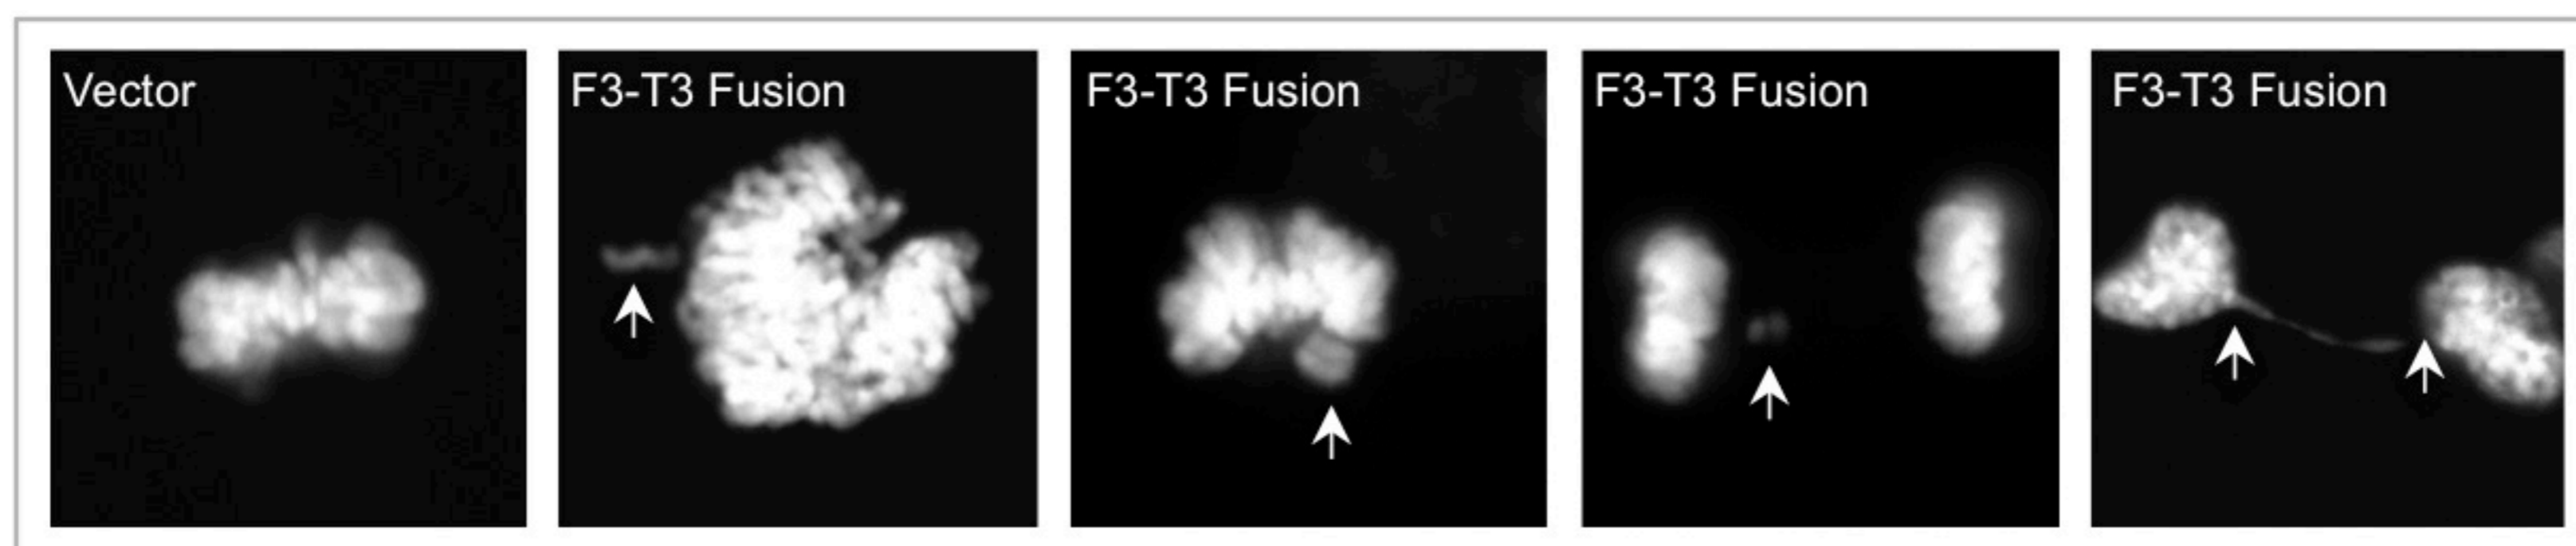**B**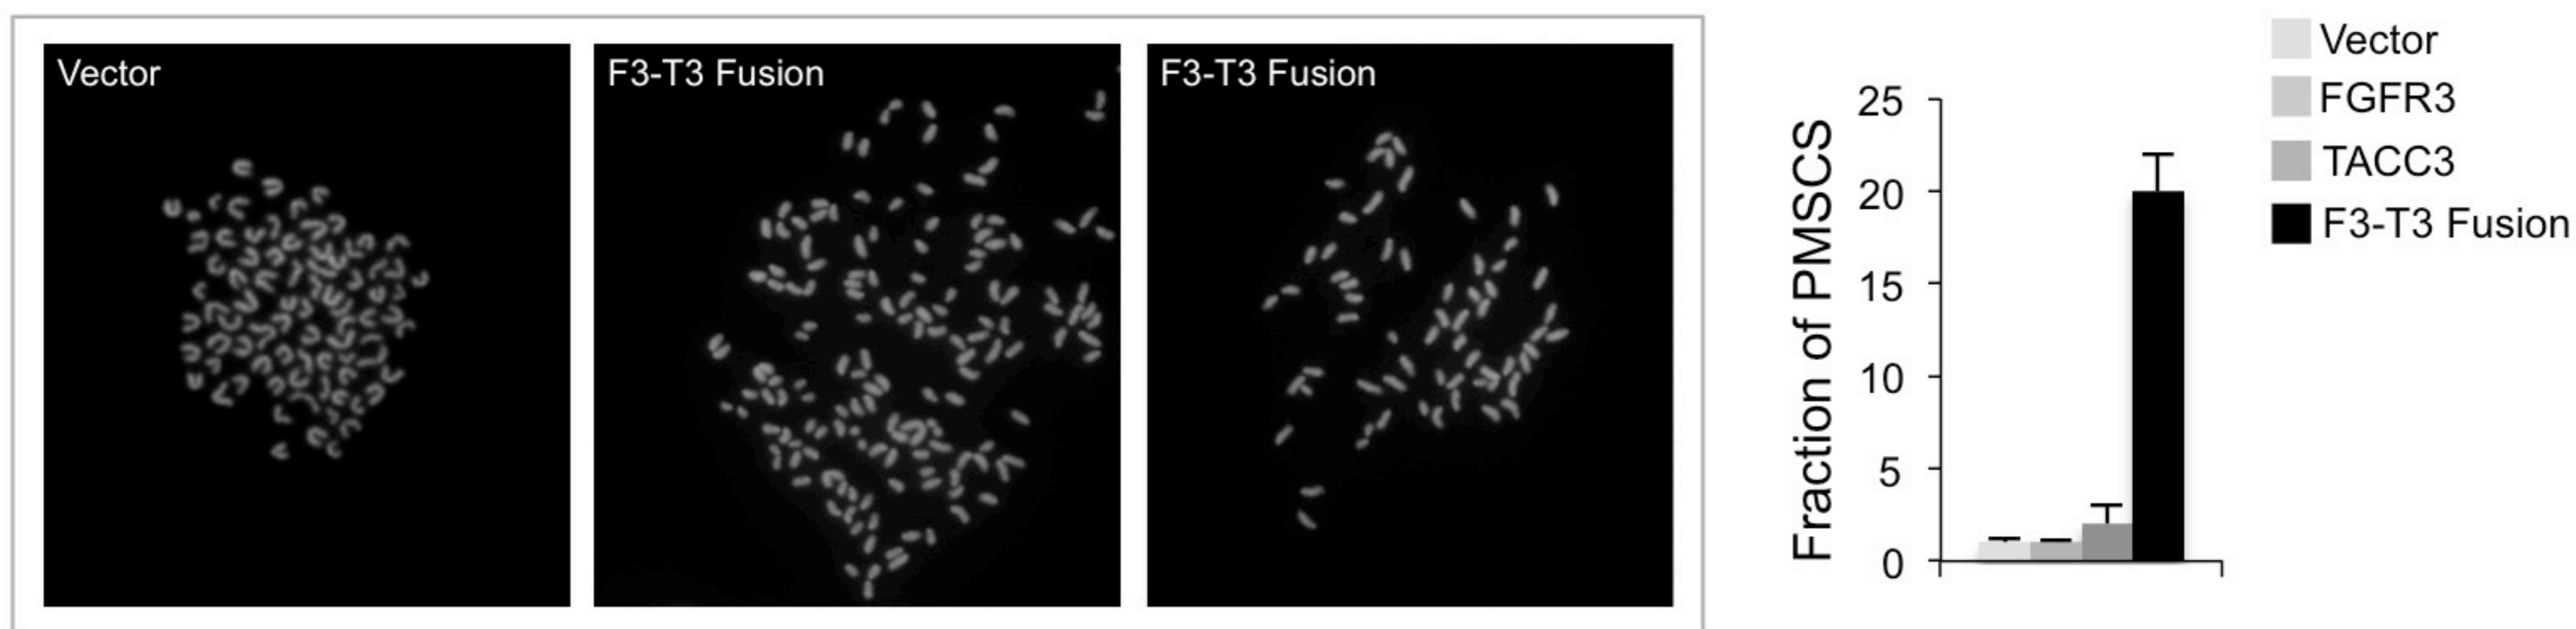**C**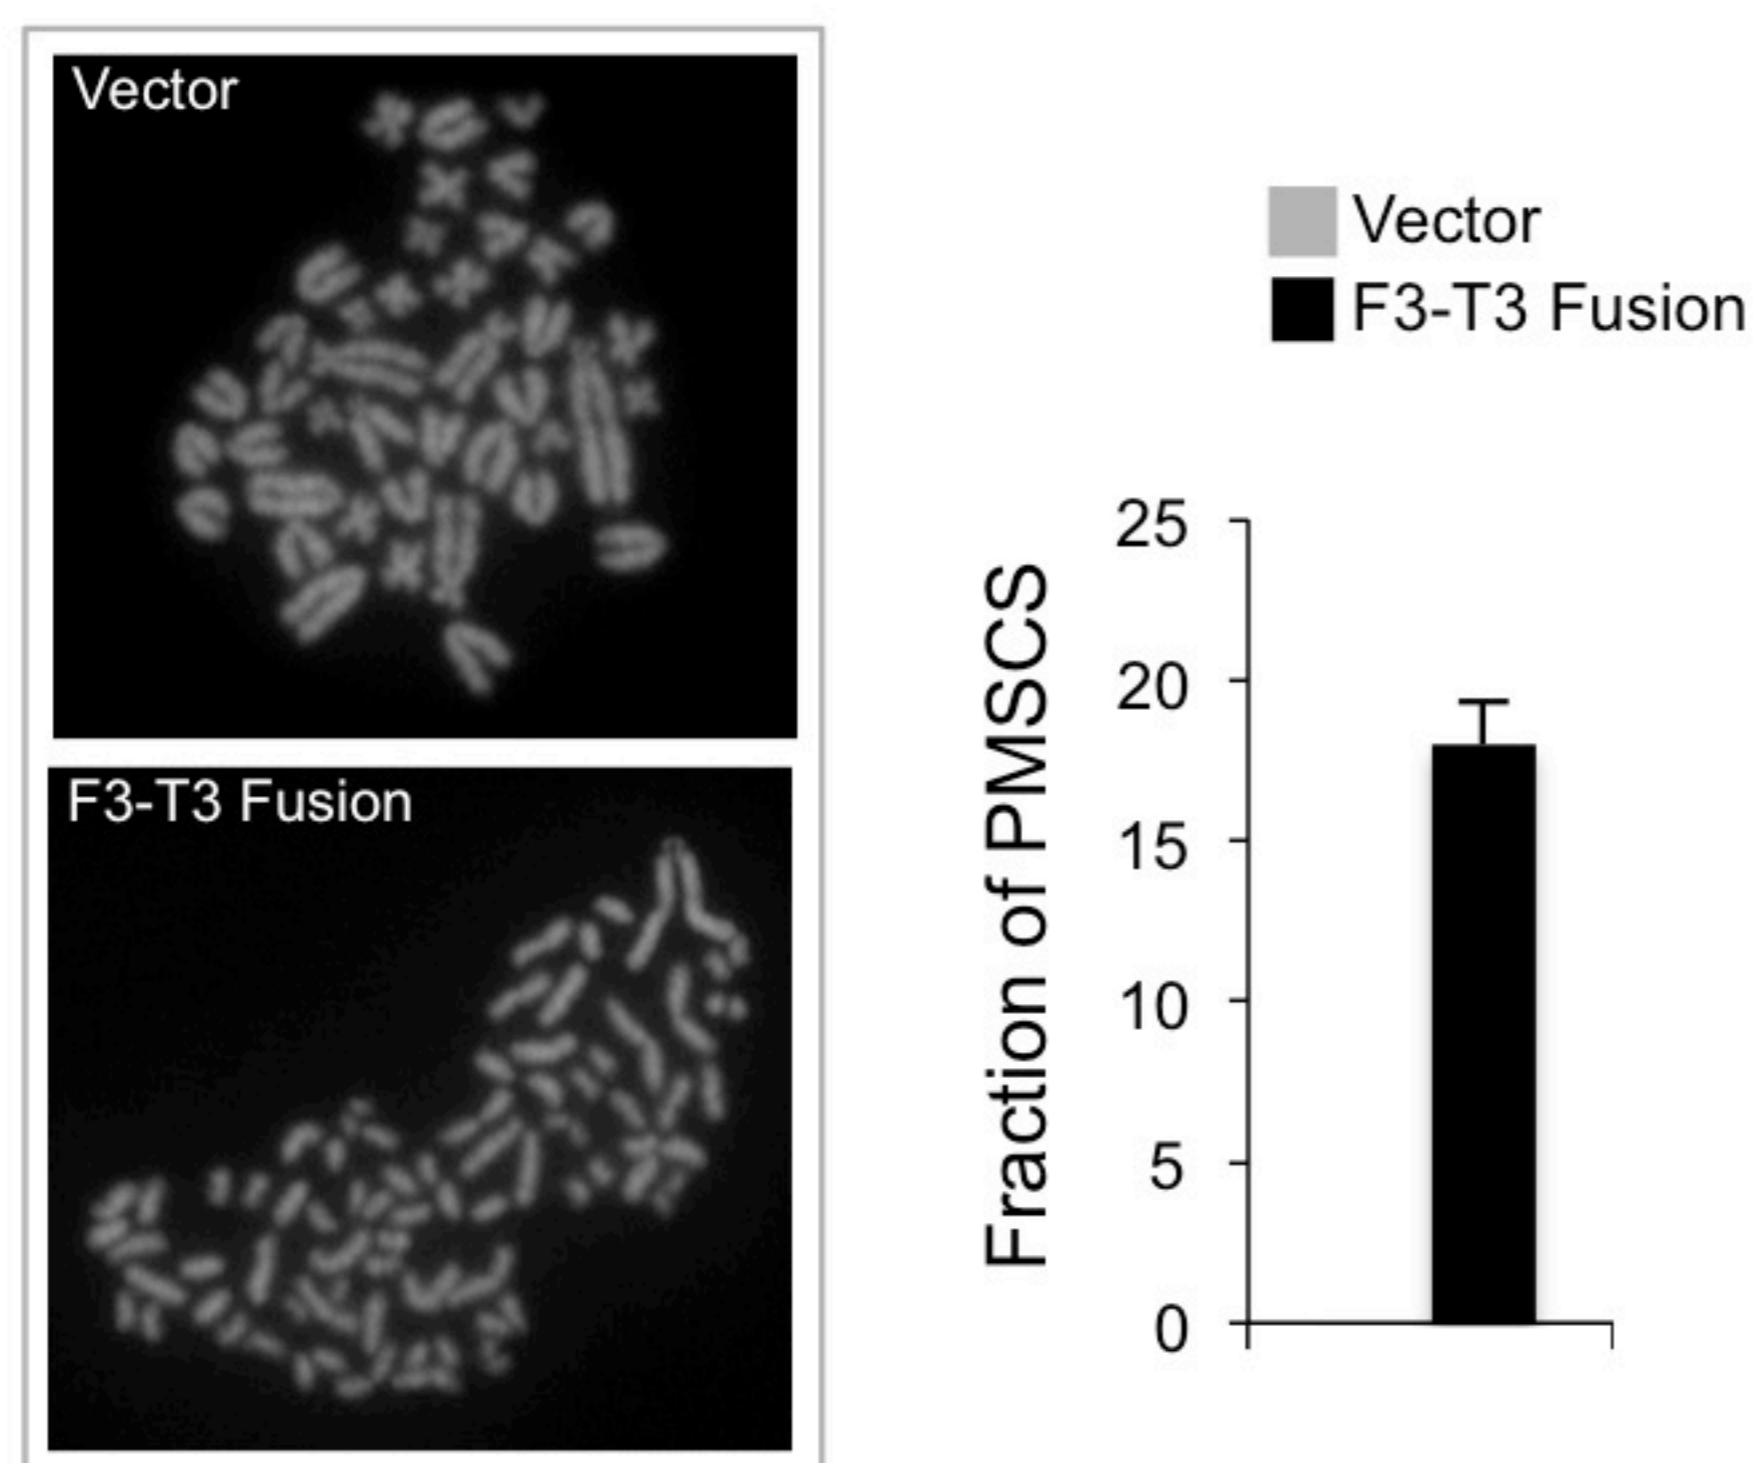**D**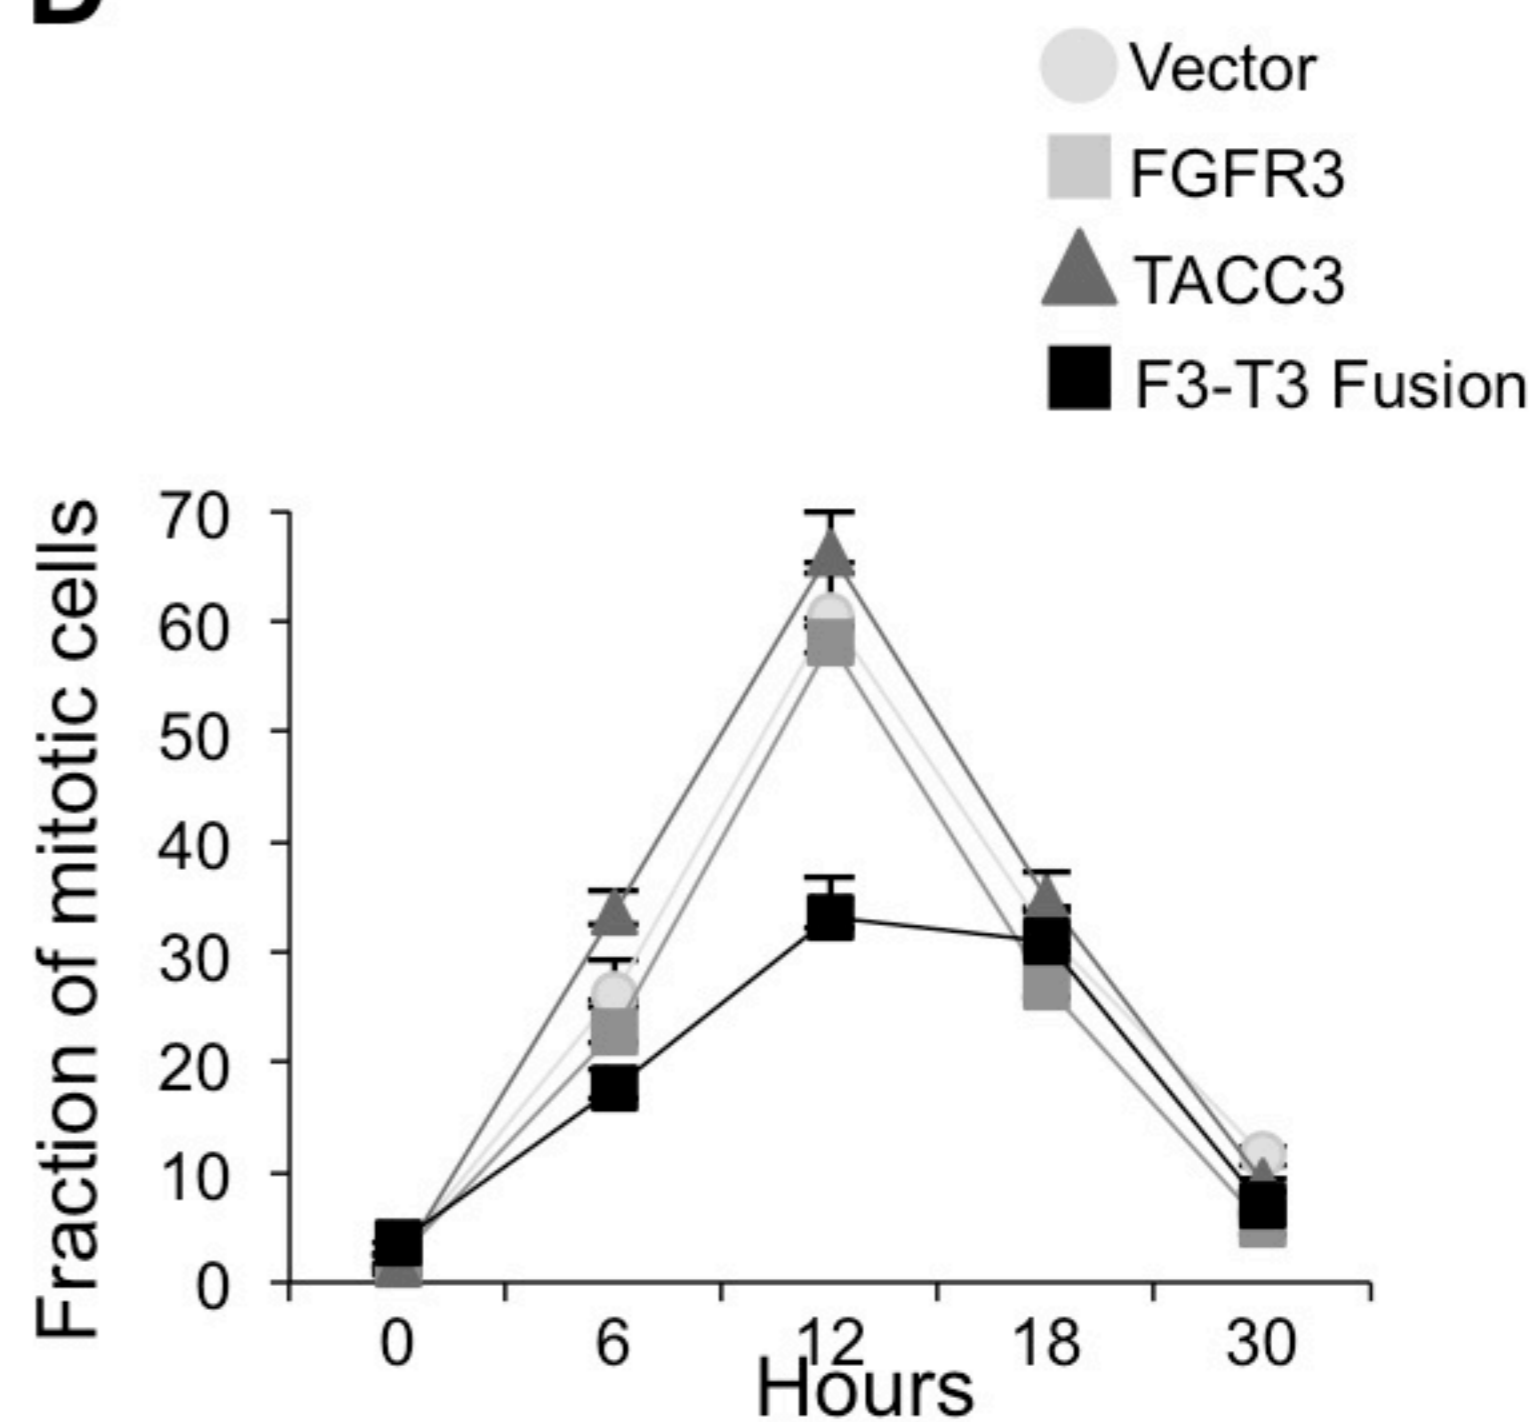**E**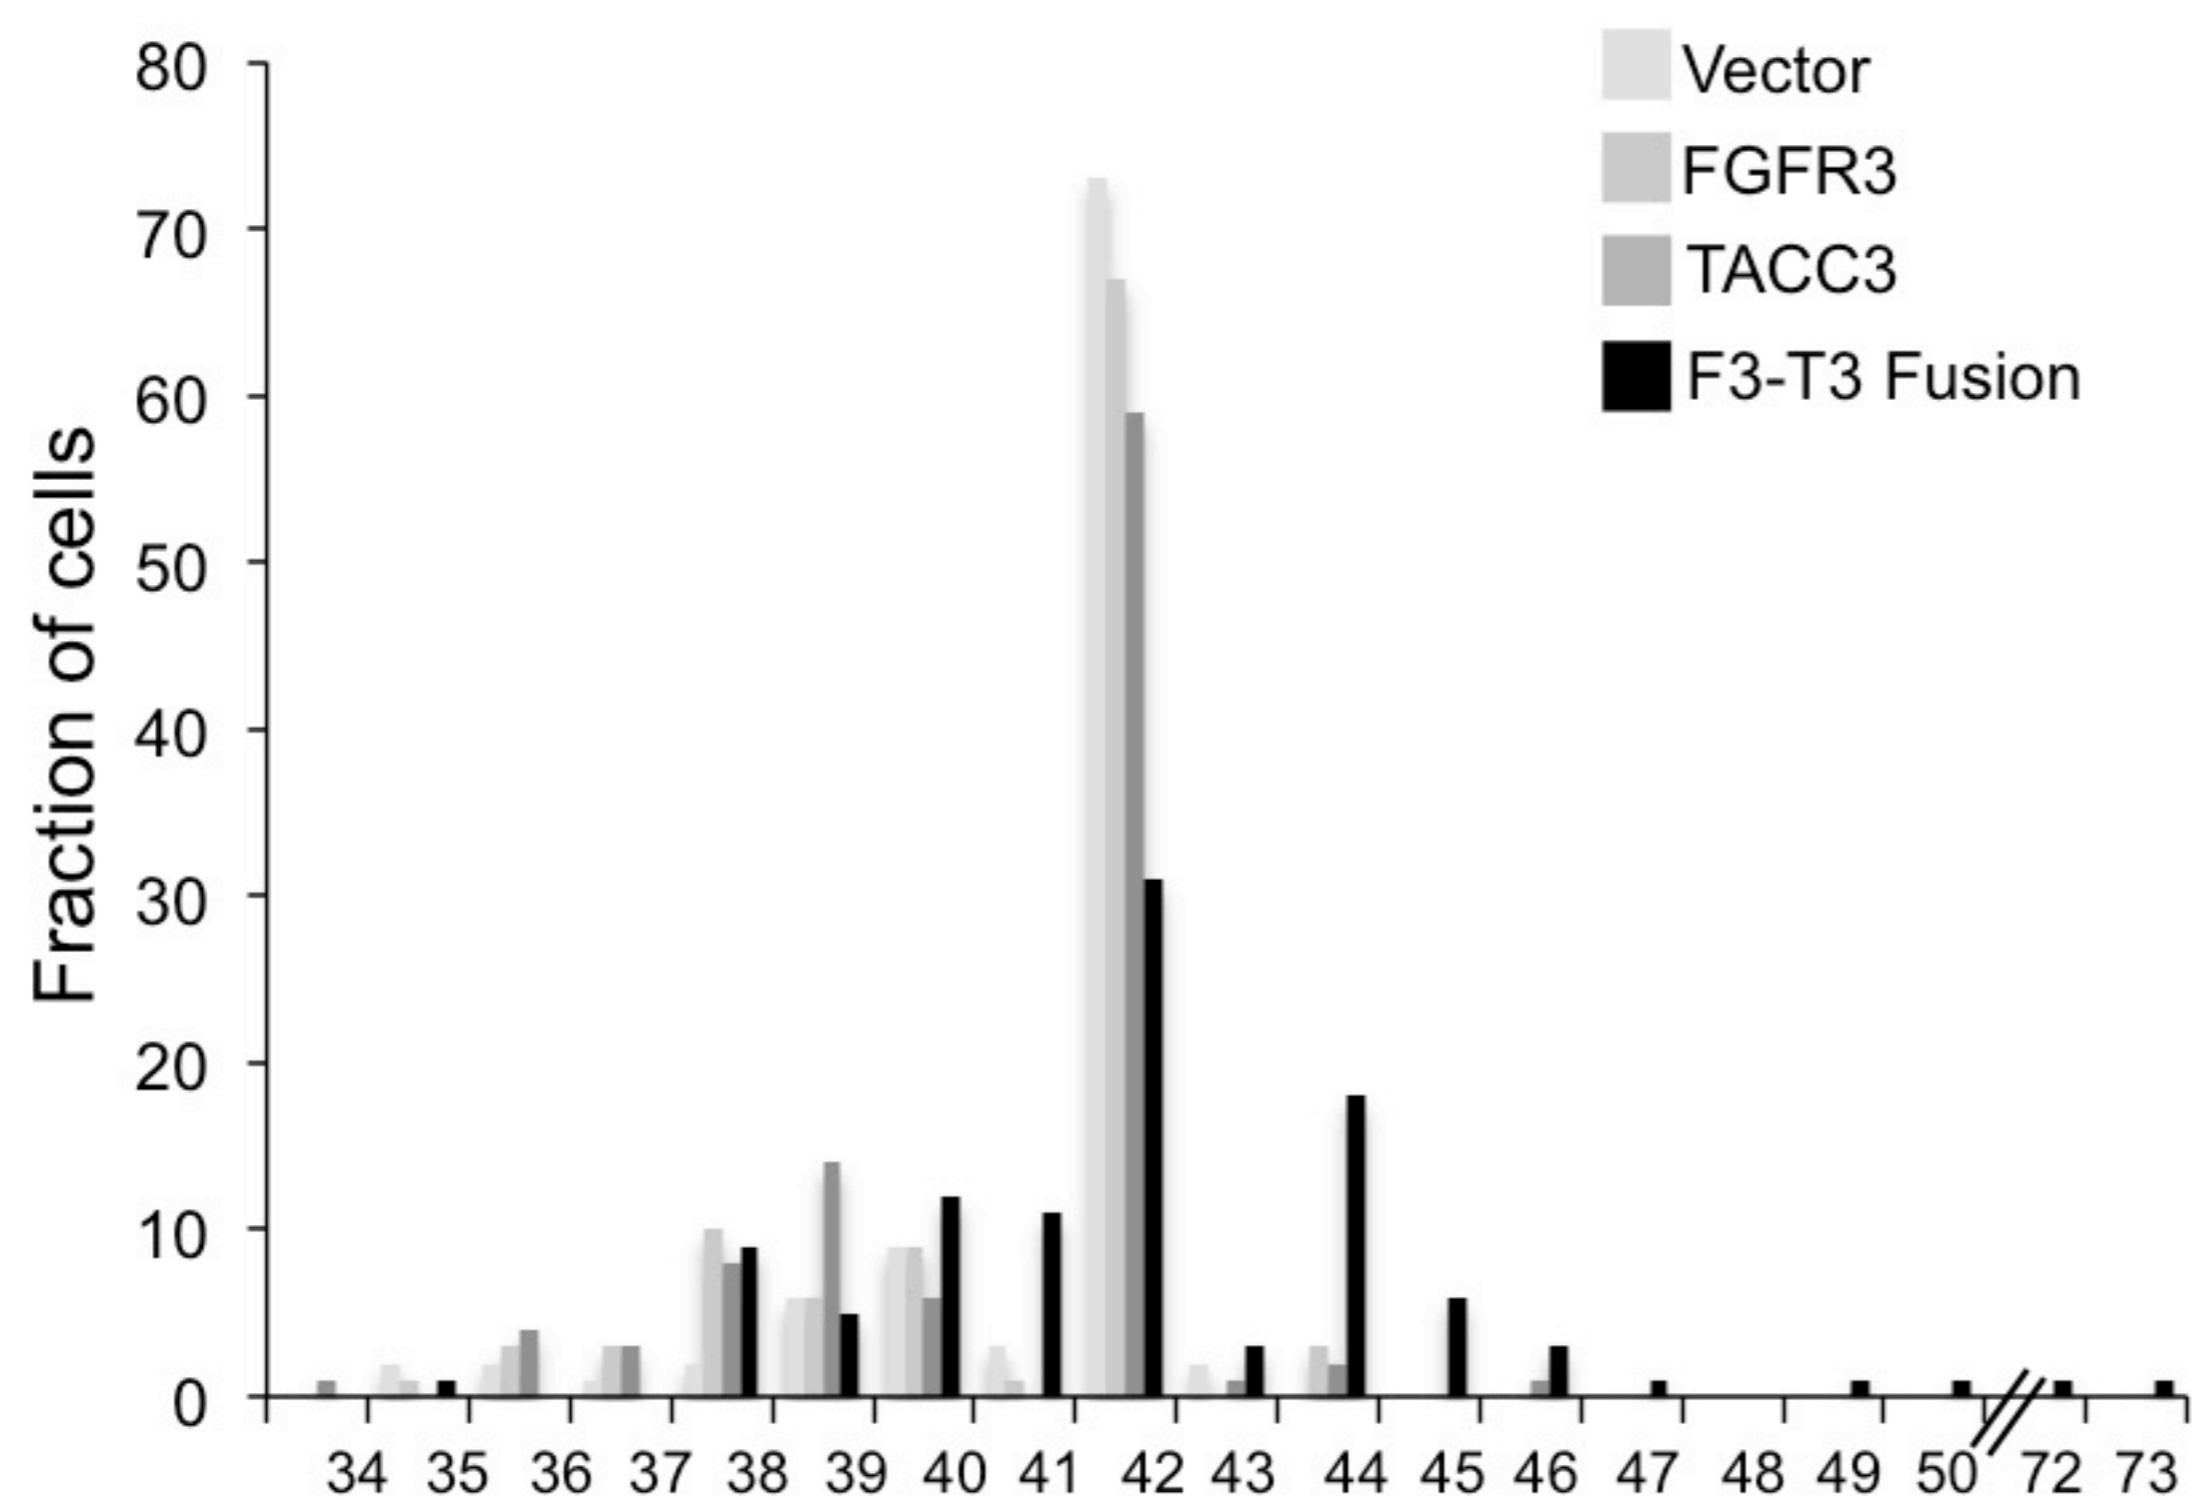**F**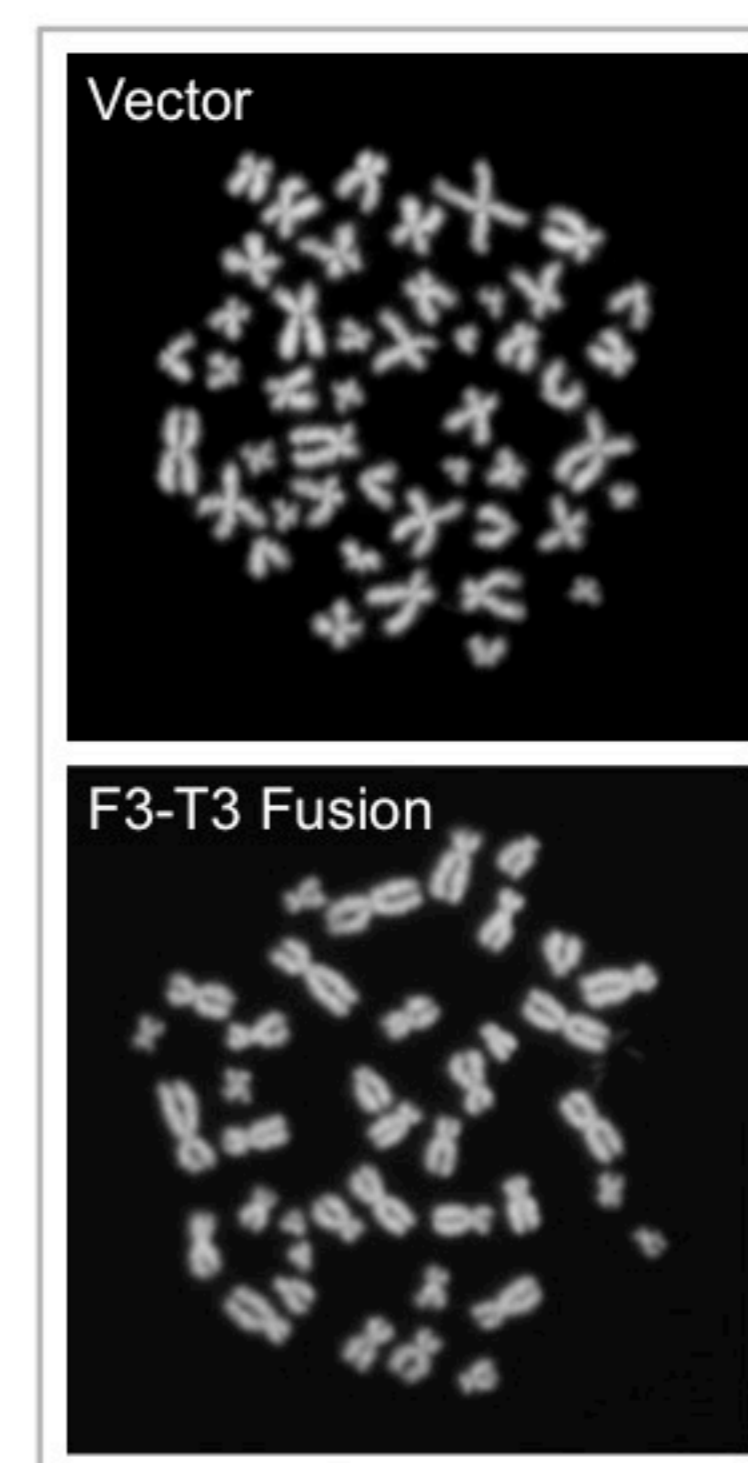

Figure S9

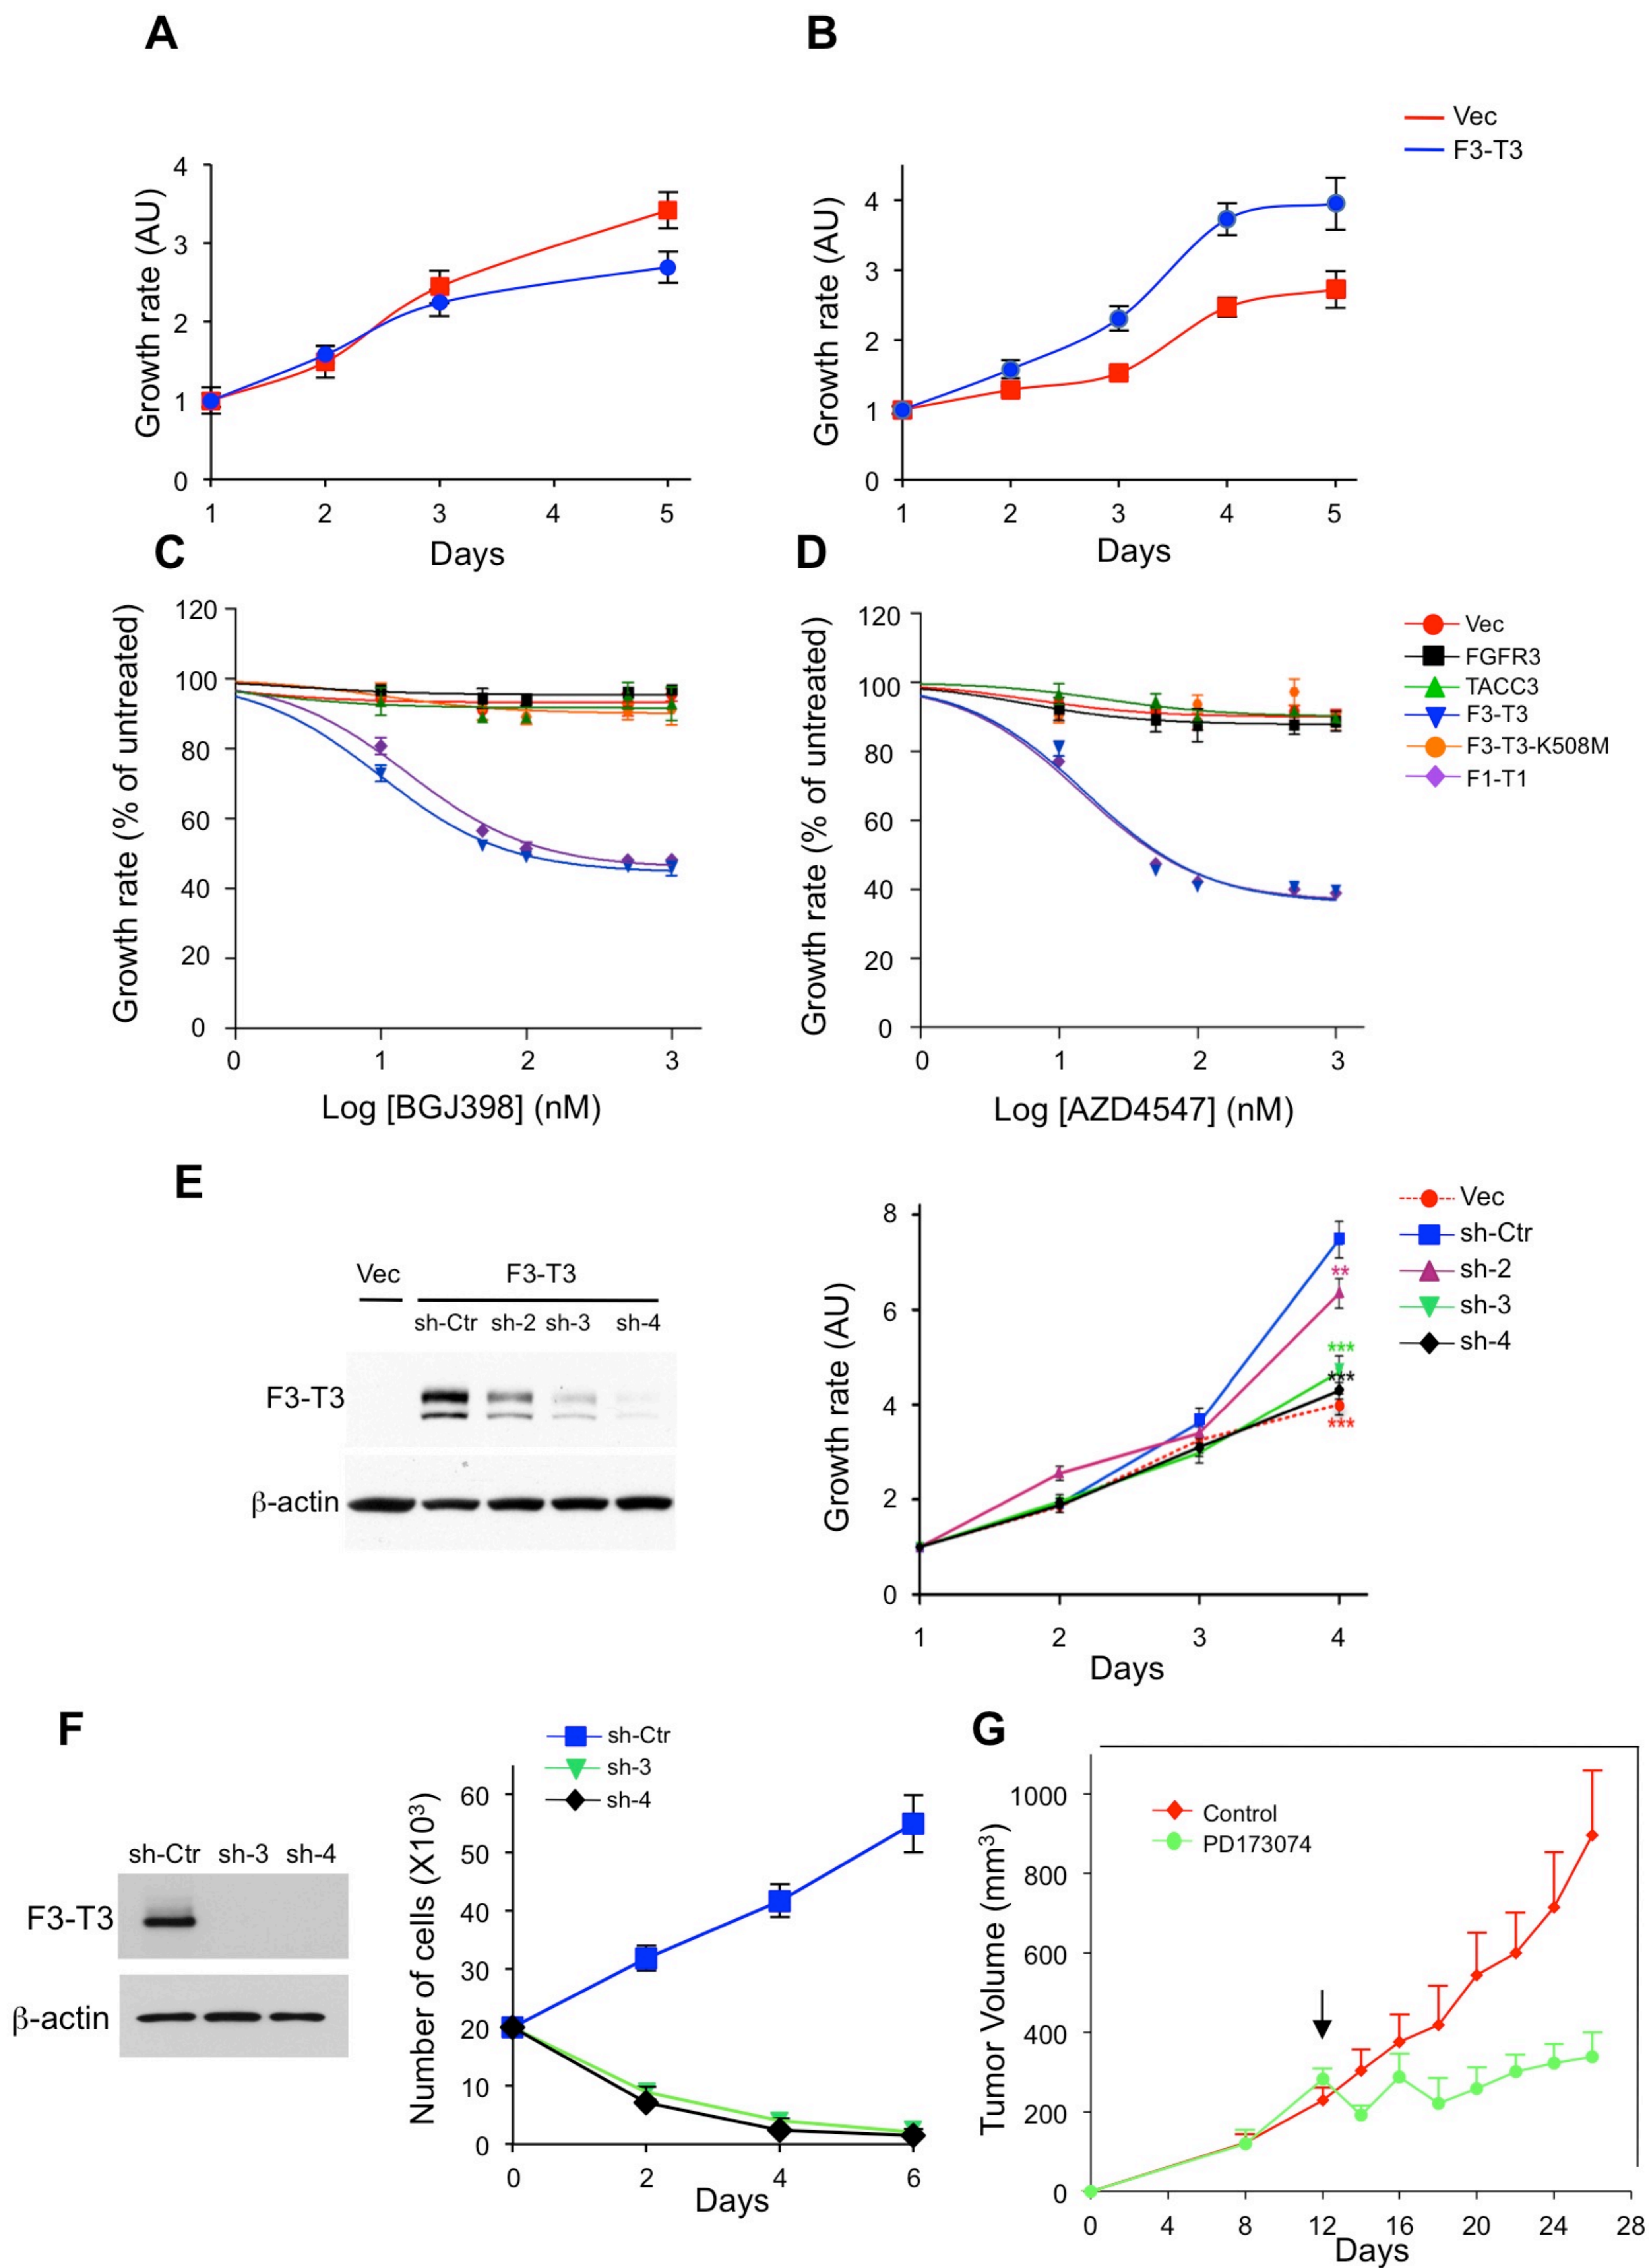

Figure S10

**Table S1.** Predicted in-frame fusion proteins from RNA-Seq of nine GSCs

| <b>Sample</b> | <b>#SplitInserts</b> | <b>#SplitReads</b> | <b>Gene1</b> | <b>Gene2</b> | <b>RefSeq1</b> | <b>RefSeq2</b> | <b>TxPos1</b> | <b>TxPos2</b> | <b>Chr1</b> | <b>Strand1</b> | <b>hg19_GenPos1</b> | <b>Chr2</b> | <b>Strand2</b> | <b>hg19_GenPos2</b> |
|---------------|----------------------|--------------------|--------------|--------------|----------------|----------------|---------------|---------------|-------------|----------------|---------------------|-------------|----------------|---------------------|
| GSC-1123      | 294                  | 76                 | FGFR3        | TACC3        | NM_000142      | NM_006342      | 2530          | 1751          | 4           | +              | 1808842             | 4           | +              | 1737004             |
| GSC-0114      | 37                   | 54                 | POLR2A       | WRAP53       | NM_000937      | NM_001143990   | 479           | 798           | 17          | +              | 7399259             | 17          | +              | 7604059             |
| GSC-0114      | 7                    | 48                 | CAPZB        | UBR4         | NM_001206540   | NM_020765      | 228           | 12111         | 1           | -              | 19712098            | 1           | -              | 19433440            |
| GSC-0517      | 8                    | 29                 | ST8SIA4      | PAM          | NM_005668      | NM_000919      | 1125          | 730           | 5           | -              | 100147809           | 5           | +              | 102260661           |
| GSC-0308      | 6                    | 17                 | PIGU         | NCOA6        | NM_080476      | NM_014071      | 729           | 6471          | 20          | -              | 33203914            | 20          | -              | 33303130            |
| GSC-0127      | 1                    | 6                  | IFNAR2       | IL10RB       | NM_000874      | NM_000628      | 1083          | 149           | 21          | +              | 34632901            | 21          | +              | 34640699            |

**Table S2.** List of split inserts supporting the identification of FGFR3-TACC3 fusion genes in four GBM samples from the TCGA exome collection

| TCGAsampleID | gene1 | gene1 length | readID                              | %identity | length | mismatch | gap | read start | read end | hg18 genome | hg18 genome | e-value | bit score | read 1 fasta                                                                         |
|--------------|-------|--------------|-------------------------------------|-----------|--------|----------|-----|------------|----------|-------------|-------------|---------|-----------|--------------------------------------------------------------------------------------|
| TCGA-06-6390 | FGFR3 | 76           | C01PRACXX110628:1:1301:1934:116558  | 100       | 76     | 0        | 0   | 1          | 76       | 1778372     | 1778447     | 8E-40   | 151       | GTGCTGGCATGCCGCGCCCTCCAGAGGCCACC<br>TTCAAGCAGCTGGTGAGGACCTGGACCGTGTCT<br>TACCGTG     |
| TCGA-06-6390 | FGFR3 | 76           | C01RDACXX110628:3:2305:4872:47008   | 98.68     | 76     | 1        | 0   | 1          | 76       | 1778364     | 1778439     | 2E-37   | 143       | ATGCGGGAGTGTGGCATGACGCGCCCTCCAGAG<br>GCCACCTTCAAGCAGCTGGTGGAGGACCTGGACC<br>GTGTCC    |
| TCGA-06-6390 | FGFR3 | 76           | D03U9ACXX110625:6:1203:16178:138219 | 100       | 76     | 0        | 0   | 1          | 76       | 1778413     | 1778488     | 8E-40   | 151       | AGCTGGTGGAGGACCTGGACCGTGTCTTACCGTG<br>ACGTCCACCGACGTGAGTGTGGTCTGGCCTGGT<br>GCCACC    |
| TCGA-06-6390 | TACC3 | 76           | C01PRACXX110628:2:1102:13552:120312 | 100       | 76     | 0        | 0   | 1          | 76       | 1708918     | 1708843     | 8E-40   | 151       | CCCTTAAACAACCTGTTCCCTCAGACCACACAAA<br>GACAGTTCAAGAGGGACTCAAGGACTTACAGGAAT<br>GTCCA   |
| TCGA-06-6390 | TACC3 | 76           | C01PRACXX110628:8:2308:6515:60354   | 100       | 76     | 0        | 0   | 1          | 76       | 1708956     | 1708881     | 8E-40   | 151       | AACCAAAGGCTCAGACCCCCAGGAATAGAAAATATA<br>GGCCCTTAAACAACCTCGTTCCTCAGACCACACAC<br>AAGA  |
| TCGA-06-6390 | TACC3 | 76           | C01RDACXX110628:6:1305:16843:57213  | 98.68     | 76     | 1        | 0   | 1          | 76       | 1708865     | 1708790     | 2E-37   | 143       | TCAAGGACTTACAGGAATGTCCAGTGTCTCCAAGAA<br>ATCGAACTCCACAAGCTTGGCTTCCCGCGCACGTC<br>CTGAG |
| TCGA-06-6390 | TACC3 | 75           | D03U9ACXX110625:2:1202:19578:90281  | 100       | 75     | 0        | 0   | 1          | 75       | 1708861     | 1708787     | 3E-39   | 149       | GGACTTACAGGAATGTCCAGTGTCTCCAAGAAATCG<br>AACTCCACAAGCTTGGCTTCCCGCGGACGTCTGA<br>GGGAT  |
| TCGA-06-6390 | TACC3 | 76           | D03U9ACXX110625:4:2306:2694:174970  | 100       | 76     | 0        | 0   | 1          | 76       | 1708896     | 1708821     | 8E-40   | 151       | CAGACCACACAAGACAGTTCAAGAGGGACTCAA<br>GGACTTACAGGAATGTCCAGTGTCTCCAAGAAATCG<br>AACTC   |
| TCGA-12-0826 | FGFR3 | 72           | 61C59AAXX100217:4:21:17613:20886    | 98.61     | 72     | 0        | 1   | 1          | 71       | 1778439     | 1778510     | 2E-34   | 133       | CTTACCGTGACGTCCACCACGCTGAGTGTGGCTC<br>TGCCCTGGTGCCACCCGCCTATGCCCTCCCTGC<br>CCTTAG    |
| TCGA-12-0826 | TACC3 | 75           | 42MJNAAXX090813:5:30:1412:1280#0    | 100       | 75     | 0        | 0   | 2          | 76       | 1707299     | 1707225     | 3E-39   | 149       | AACTTGAGGTATAAGGACTGCTTCTCAAGGCCGA<br>CTCCTTAACTGGGGACAAGAGGGCAAGTGATCAG<br>GTCTG    |
| TCGA-12-0826 | TACC3 | 76           | 61C59AAXX100217:4:2:4279:6949       | 100       | 76     | 0        | 0   | 1          | 76       | 1707299     | 1707224     | 8E-40   | 151       | AACTTGAGGTATAAGGACTGCTTCTCAAGGCCGAC<br>TCTTAAACTGGGGACAAGAGGGCAAGTGATCAGG<br>TCTGA   |
| TCGA-12-0826 | FGFR3 | 76           | 42MJNAAXX090813:5:37:435:1250#0     | 100       | 76     | 0        | 0   | 1          | 76       | 1778346     | 1778421     | 8E-40   | 151       | GCCCGCAGGTACATGATCATGCGGGAGTGTGGCA<br>TGCCGCGCCCTCCAGAGGCCACCTTCAAGCAGC<br>TGGTGG    |
| TCGA-12-0826 | FGFR3 | 51           | 61C59AAXX100217:5:89:7727:2557      | 98.04     | 51     | 1        | 0   | 1          | 51       | 1778443     | 1778493     | 4E-24   | 93.7      | ACCGTGACGTCCACCACGCTGAGTGTGGCTGTGG<br>CCTGGTGCAGCCGCGATCTCTCCCTGTCTCT<br>TTTCT       |
| TCGA-19-5958 | TACC3 | 62           | D03U9ACXX110625:4:2206:9451:114168  | 90.32     | 62     | 6        | 0   | 1          | 62       | 1707141     | 1707202     | 4E-17   | 75.8      | TGGGAGGTGCGGGGGCCGGGGGGGAGTGT<br>GCAGGTGAGCTCCCTGGCCCTTGGCCCCCTGCCT<br>CTGGGGG       |
| TCGA-19-5958 | TACC3 | 74           | D03U9ACXX110625:1:2204:20064:21192  | 95.95     | 74     | 3        | 0   | 1          | 74       | 1707097     | 1707170     | 5E-33   | 123       | CTGGGAATGGTGGTGTCTCGGGCAGGGTGTGGGT<br>GACGGGGGTGGAGGGTGCGGGGACCGGGGG<br>GGGGAGGG     |
| TCGA-27-1835 | FGFR3 | 76           | C00HWABXX110325:7:2202:17680:110666 | 100       | 76     | 0        | 0   | 1          | 76       | 1778338     | 1778413     | 8E-40   | 151       | AGCGCCCTGCCCGCAGGTACATGATCATGCGGGAG<br>TGCTGGCATGCCGCGCCCTCCAGAGGCCACCTT<br>CAAGCA   |
| TCGA-27-1835 | TACC3 | 76           | C00HWABXX110325:7:1104:10731:5183   | 100       | 76     | 0        | 0   | 1          | 76       | 1709492     | 1709417     | 8E-40   | 151       | GCCAACGCCATGCCAGGCCGAGAGTCCCGGGG<br>AGGTGCTGGTGGCAGCTGACTCGGGGACACT<br>GGGTGAA       |
| TCGA-27-1835 | TACC3 | 60           | B09V2ABXX110408:2:2201:5811:24541   | 100       | 60     | 0        | 0   | 1          | 60       | 1709504     | 1709445     | 3E-30   | 119       | AGGCCACCAGAGGCCAACGCCATGCCAGGCCGG<br>AGAGTCCCGGGGAGGCTGCTGGTGGGGAGGCGAA<br>CGCGGGGA  |
| TCGA-27-1835 | TACC3 | 61           | B097UABXX110405:4:2102:15742:63594  | 91.8      | 61     | 5        | 0   | 1          | 61       | 1709482     | 1709422     | 6E-19   | 81.8      | TGCCAGGCCGGAGAGTCCCGGGCGGCTGCTGG<br>GGGGAGCTGACTGGGGGGGACTGGGGGGGAG<br>ACCCGGGCC     |



Table S2 continuation

| TCGAsampleID | gene2 | gene2 length | readID                              | %identity | length | mismatch | gap | read start | read end | hg18 genome start | hg18 genome end | e-value | bit score | read2 fasta                                                                                                                                                                                                                                                                                                                                                                                                                                                                                                                                                                                                                                                                                             |
|--------------|-------|--------------|-------------------------------------|-----------|--------|----------|-----|------------|----------|-------------------|-----------------|---------|-----------|---------------------------------------------------------------------------------------------------------------------------------------------------------------------------------------------------------------------------------------------------------------------------------------------------------------------------------------------------------------------------------------------------------------------------------------------------------------------------------------------------------------------------------------------------------------------------------------------------------------------------------------------------------------------------------------------------------|
| TCGA-06-6390 | TACC3 | 76           | C01PRACXX110628:1:1301:1934:116558  | 100       | 76     | 0        | 0   | 1          | 76       | 1708922           | 1708847         | 8E-40   | 151       | TAGGCCCTTAAACAACCTCGTTCCCTCAGACCACAC<br>ACAAGACAGTTCAAGAGGGACTCAAGGACTTACAG<br>GAATG<br>ACTCAAGGACTTACAGGAATGTCCAGTGTCCCAAG<br>AAATCGAACTCCACAAGCTTGGCTTCCCGGGACG<br>TCCTG<br>AGGCCCTTAAACAACCTCGTTCCCTCAGACCACACA<br>CAAGACAGTTCAAGAGGGACTCAAGGACTTACAGG<br>AATGT<br>GCCCTCCCAGAGGCCACCTTCAAGCAGCTGGTGG<br>AGGACCTGGACCGTGTCTTACCGTGACGTCCACC<br>GACGTG<br>GCCGCGCCCTCCAGAGGCCACCTTCAAGCAGCT<br>GGTGAGGACCTGGACCGTGTCTTACCGTGACGT<br>CCACCG<br>GGTGAGGACCTGGACCGTGTCTTACCGGGACG<br>TCCACCGACGGAGTGTCTTACCGTGGCTGGTGC<br>CACCCGCC<br>GACGTCCACCGACGTGAGTGTGGCTGTGGCTG<br>GTGCCACCCGCCTATGCCCTCCCCTGCCGTCCC<br>CGGCCAT<br>TGTCTTACCGTGACGTCCACCGACGTGAGTGTG<br>GCTCTGGCTGGTCCACCCGCCTATGCCCTCCC<br>CTGCC |
| TCGA-06-6390 | TACC3 | 76           | C01RDACXX110628:3:2305:4872:47008   | 100       | 76     | 0        | 0   | 1          | 76       | 1708867           | 1708792         | 8E-40   | 151       |                                                                                                                                                                                                                                                                                                                                                                                                                                                                                                                                                                                                                                                                                                         |
| TCGA-06-6390 | TACC3 | 76           | D03U9ACXX110625:6:1203:16178:138219 | 100       | 76     | 0        | 0   | 1          | 76       | 1708921           | 1708846         | 8E-40   | 151       |                                                                                                                                                                                                                                                                                                                                                                                                                                                                                                                                                                                                                                                                                                         |
| TCGA-06-6390 | FGFR3 | 76           | C01PRACXX110628:2:1102:13552:120312 | 100       | 76     | 0        | 0   | 1          | 76       | 1778387           | 1778462         | 8E-40   | 151       |                                                                                                                                                                                                                                                                                                                                                                                                                                                                                                                                                                                                                                                                                                         |
| TCGA-06-6390 | FGFR3 | 76           | C01PRACXX110628:8:2308:6515:60354   | 100       | 76     | 0        | 0   | 1          | 76       | 1778382           | 1778457         | 8E-40   | 151       |                                                                                                                                                                                                                                                                                                                                                                                                                                                                                                                                                                                                                                                                                                         |
| TCGA-06-6390 | FGFR3 | 76           | C01RDACXX110628:6:1305:16843:57213  | 96.05     | 76     | 3        | 0   | 1          | 76       | 1778417           | 1778492         | 1E-32   | 127       |                                                                                                                                                                                                                                                                                                                                                                                                                                                                                                                                                                                                                                                                                                         |
| TCGA-06-6390 | FGFR3 | 76           | D03U9ACXX110625:2:1202:19578:90281  | 100       | 76     | 0        | 0   | 1          | 76       | 1778447           | 1778522         | 8E-40   | 151       |                                                                                                                                                                                                                                                                                                                                                                                                                                                                                                                                                                                                                                                                                                         |
| TCGA-06-6390 | FGFR3 | 76           | D03U9ACXX110625:4:2306:2694:174970  | 100       | 76     | 0        | 0   | 1          | 76       | 1778435           | 1778510         | 8E-40   | 151       |                                                                                                                                                                                                                                                                                                                                                                                                                                                                                                                                                                                                                                                                                                         |
| TCGA-12-0826 | TACC3 | 72           | 61C59AAXX100217:4:21:17613:20886    | 95.83     | 72     | 3        | 0   | 1          | 72       | 1707362           | 1707291         | 3E-30   | 119       | TACCTGTGGTCTCGGTGCCACGGGCACTGGTCT<br>ACCAGGGCTGTCCCTCCGGAGGGGTCAAACITGA<br>GGGATA<br>CTGGACCGTGTCTTACCGTGACGTCCACCGACGT<br>GAGTGTGGCTCTGGCTGGTGGCCACCCGCCATG<br>CCCCCTC<br>TGTCTTACCGTGACGTCCACCGACGTGAGTGTG<br>GCTCTGGCTGGTGGCCACCCGCCTATGCCCTCCC<br>CTGCC<br>AAAAGATTTAAGTTTAGATCTTAAATACTAGAACG<br>GTGGCTGTAACCAGCAAGGCAGGAGCCCTTTGTGT<br>TGG<br>TGGGTCAAACCTTGAAGTATAAGGACTGCTTCCCTCAA<br>GGCCGACTCCTTATACTGGGACAAGAGGGCAAGT<br>GATCA                                                                                                                                                                                                                                                               |
| TCGA-12-0826 | FGFR3 | 76           | 42MJNAAXX090813:5:30:1412:1280#0    | 98.68     | 76     | 1        | 0   | 1          | 76       | 1778427           | 1778502         | 2E-37   | 143       |                                                                                                                                                                                                                                                                                                                                                                                                                                                                                                                                                                                                                                                                                                         |
| TCGA-12-0826 | FGFR3 | 76           | 61C59AAXX100217:4:2:4279:6949       | 98.68     | 76     | 0        | 1   | 1          | 75       | 1778435           | 1778510         | 8E-37   | 141       |                                                                                                                                                                                                                                                                                                                                                                                                                                                                                                                                                                                                                                                                                                         |
| TCGA-12-0826 | TACC3 | 67           | 42MJNAAXX090813:5:37:435:1250#0     | 98.51     | 67     | 1        | 0   | 1          | 67       | 1707635           | 1707569         | 5E-32   | 125       |                                                                                                                                                                                                                                                                                                                                                                                                                                                                                                                                                                                                                                                                                                         |
| TCGA-12-0826 | TACC3 | 75           | 61C59AAXX100217:5:89:7727:2557      | 97.33     | 75     | 2        | 0   | 2          | 76       | 1707306           | 1707232         | 5E-36   | 133       |                                                                                                                                                                                                                                                                                                                                                                                                                                                                                                                                                                                                                                                                                                         |
| TCGA-19-5958 | FGFR3 | 76           | D03U9ACXX110625:4:2206:9451:114168  | 98.68     | 76     | 1        | 0   | 1          | 76       | 1778462           | 1778537         | 2E-37   | 143       | GAGTGTGGCTCTGGCCTGGTGCCACCCGCCTATG<br>CCCCTCCCCTGGCGTCCCAGGCCATCCTGCCCCC<br>CAGAGT<br>GAGTGTGGCTCTGGCCTGGTGCCACCCGCCTATG<br>CCCCTCCCCTGCCGTCCCAGGCCATCCTGCCCCC<br>CAGAGT                                                                                                                                                                                                                                                                                                                                                                                                                                                                                                                                |
| TCGA-19-5958 | FGFR3 | 76           | D03U9ACXX110625:1:2204:20064:21192  | 100       | 76     | 0        | 0   | 1          | 76       | 1778462           | 1778537         | 2E-41   | 151       |                                                                                                                                                                                                                                                                                                                                                                                                                                                                                                                                                                                                                                                                                                         |
| TCGA-27-1835 | TACC3 | 76           | C00HWABXX110325:7:2202:17680:110666 | 96.05     | 76     | 3        | 0   | 1          | 76       | 1709492           | 1709417         | 1E-32   | 127       | GCCAACGCCATGCCAGGCCGAGAGTCCCGGGG<br>AGGCTGTGGTGGGAGCTGACTTCCGGGACACT<br>GGGGGAA<br>CATGCGGGAGTGTGGCATGGCGGCCCTCCCAG<br>CGGCCACCTTCAAGCAGCTGGTGGGGACCTGG<br>ACCGTGTG<br>ACGTGAGTGTGGCTGTGGCTGGTGCCACCCGC<br>CTATGCCCTCCCCTGCCGTCCCAGGCCATCCTG<br>CCCCCA<br>CCCTCCCAGAGGCCACCTTCAAGCAGCTGGTGA<br>GGACCTGGACCGTGTCTTACCGTGACGTCCACCG<br>ACGTGA                                                                                                                                                                                                                                                                                                                                                             |
| TCGA-27-1835 | FGFR3 | 76           | C00HWABXX110325:7:1104:10731:5183   | 96.05     | 76     | 3        | 0   | 1          | 76       | 1778363           | 1778438         | 1E-32   | 127       |                                                                                                                                                                                                                                                                                                                                                                                                                                                                                                                                                                                                                                                                                                         |
| TCGA-27-1835 | FGFR3 | 76           | B09V2ABXX110408:2:2201:5811:24541   | 100       | 76     | 0        | 0   | 1          | 76       | 1778458           | 1778533         | 8E-40   | 151       |                                                                                                                                                                                                                                                                                                                                                                                                                                                                                                                                                                                                                                                                                                         |
| TCGA-27-1835 | FGFR3 | 76           | B097UABXX110405:4:2102:15742:63594  | 100       | 76     | 0        | 0   | 1          | 76       | 1778388           | 1778463         | 8E-40   | 151       |                                                                                                                                                                                                                                                                                                                                                                                                                                                                                                                                                                                                                                                                                                         |

**Table S3.** List of split reads supporting the identification of FGFR3-TACC3 fusion genes in four GBM samples from TCGA exomes

| sample       | genesplit1 | readID                              | directionsplit | hg18startsplit1 | hg18stopssplit1 | length | mismatch1 | gap1 | seqsplit                                                                                                                                                                                                                                                                                                                                                                                                                                                                                                                                                                                                                                                                                                                                                                                                                                                                                                                                                                                                                                                                                                                                                                                                                                                                                                                                                                                                                                                                                                                                                                                                                                                                                                                                          |
|--------------|------------|-------------------------------------|----------------|-----------------|-----------------|--------|-----------|------|---------------------------------------------------------------------------------------------------------------------------------------------------------------------------------------------------------------------------------------------------------------------------------------------------------------------------------------------------------------------------------------------------------------------------------------------------------------------------------------------------------------------------------------------------------------------------------------------------------------------------------------------------------------------------------------------------------------------------------------------------------------------------------------------------------------------------------------------------------------------------------------------------------------------------------------------------------------------------------------------------------------------------------------------------------------------------------------------------------------------------------------------------------------------------------------------------------------------------------------------------------------------------------------------------------------------------------------------------------------------------------------------------------------------------------------------------------------------------------------------------------------------------------------------------------------------------------------------------------------------------------------------------------------------------------------------------------------------------------------------------|
| TCGA-06-6390 | TACC3      | D03U9ACXX110625:2:1202:19578:90281  | R              | 1778521         | 1778521         | 1      | 0         | 0    | GGACTTACAGGAATGTCAGTGTCTCCCAAGAAATCGAACTCC<br>ACAAGCTTGGCTTCCCGGGAGCTCTGAGGGA***T<br>CA***TCCTCAGGACGTCGCGGGGAGCCCAAGCTTGTGGAG<br>TTCGATTTCTTGGGAGCACTGGACATTCCTGTAAGTC<br>CA***TCCTCAGGACGTCGCGGGGAGCCCAAGCTTGTGGAG<br>TTCGATTTCTTGGGAGCACTGGACATTCCTGTAAGTC<br>CA***TCCTCAGGACGTCGCGGGGAGCCCAAGCTTGTGGAG<br>TTCGATTTCTTGGGAGCACTGGACATTCCTGTAAGTC<br>GCCA***TCCTCAGGACGTCGCGGGGAGCCCAAGCTTGTGG<br>AGTTTCGATTTCTTGGGAGCACTGGACATTCCTGTAAG<br>CCGGGCA***TCCTCAGGACGTCGCGGGGAGCCCAAGCTTGT<br>TGGAGTTCGATTTCTTGGGAGCACTGGACATTCCTGT<br>CAGGAATGTCCAGTGTCTCAAGAAATCGAACTCCACAAGCT<br>TGGGTTCCCGGGAGCTCTCCGGGA***TGCGGGG<br>CAGGAATGTCCAGTGTCTCAAGAAATCGAACTCCACAAGCT<br>TGGCTTCCCGGGAGCTCTCCGGGA***TGCGGGG<br>TCCCGGCCA***TCCTCAGGACGTCGCGGGGAGCCCAAGC<br>TTGTGGAGTTCGATTTCTTGGGAGCACTGGACATTC<br>TCCCGGCCA***TCCTCAGGAGTCCCGGGGAGCCCAAGC<br>TTGTGGAGTTCGATTTCTTGGGAGCACTGGACATTC<br>GTCCCGGCCA***TCCTCAGGACGTCGCGGGGAGCCCAAG<br>GCTTGTGGAGTTCGATTTCTTGGGAGCACTGGACATTC<br>CCGTCCCGGCCA***TCCTCAGGACGTCGCGGGGAGCC<br>AAGTTCGAGTTCGATTTCTTGGGAGCACTGGACATTC<br>TGCTCCCAAGAAATCGAACTCCACAAGCTTGGCTTCCCGG<br>GACGTCCTGAGGGA***TGCGGGGAGCCCAAGCTTGTGG<br>AAGAAATCGAACTCCACAAGCTTGGCTTCCCGGGAGCTCC<br>TGAGGGA***TGCGGGGAGCCCAAGCTTGTGGAGTTCG<br>AAATCGAACTCCACAAGCTTGGCTTCCCGGGAGCTCCGTA<br>GGGA***TGCGGGGAGCCCAAGCTTGTGGAGTTCG<br>CTGGGCTGTGTCACCCGCTATGCCCTTCCCTGCGGTC<br>CCCGGCCA***TCCTCAGGAGTCCCGGGGAGCCCAAG<br>TCGTCCCGGGACTTCCGTGATGGA***TGCGGGGAGCCGCA<br>GGGGGAGGGGATAGGGGCTGTGGACACAGGCAAGCTC<br>CTTCCCGGGAGCTCTGAGGGA***TGCGGGGAGCCGNA<br>GGGGGAGGGGATAGGGGCTGTGGACACAGGCAAGCTC<br>GTGCTGTGCTTGGCTTGGTGTCCCGGCTATGCCCTTCC<br>CTGCGCTTCCCGGCCA***TCCTCAGGACGTCGCGG<br>GAGGGA***TGCGGGGAGCCCAAGCTTGTGGAGTTCG<br>CGGGTGGCCACAGCCAGCACTGACCTCGGTGG |
| TCGA-06-6390 | FGFR3      | C01PRACXX110628:3:1104:10052:66371  | F              | 1778520         | 1778521         | 2      | 0         | 0    |                                                                                                                                                                                                                                                                                                                                                                                                                                                                                                                                                                                                                                                                                                                                                                                                                                                                                                                                                                                                                                                                                                                                                                                                                                                                                                                                                                                                                                                                                                                                                                                                                                                                                                                                                   |
| TCGA-06-6390 | FGFR3      | C01PRACXX110628:5:1108:3119:22892   | F              | 1778520         | 1778521         | 2      | 0         | 0    |                                                                                                                                                                                                                                                                                                                                                                                                                                                                                                                                                                                                                                                                                                                                                                                                                                                                                                                                                                                                                                                                                                                                                                                                                                                                                                                                                                                                                                                                                                                                                                                                                                                                                                                                                   |
| TCGA-06-6390 | FGFR3      | D03U9ACXX110625:8:2304:13007:108632 | F              | 1778520         | 1778521         | 2      | 0         | 0    |                                                                                                                                                                                                                                                                                                                                                                                                                                                                                                                                                                                                                                                                                                                                                                                                                                                                                                                                                                                                                                                                                                                                                                                                                                                                                                                                                                                                                                                                                                                                                                                                                                                                                                                                                   |
| TCGA-06-6390 | FGFR3      | C01PRACXX110628:5:2108:1999:91559   | F              | 1778518         | 1778521         | 4      | 0         | 0    |                                                                                                                                                                                                                                                                                                                                                                                                                                                                                                                                                                                                                                                                                                                                                                                                                                                                                                                                                                                                                                                                                                                                                                                                                                                                                                                                                                                                                                                                                                                                                                                                                                                                                                                                                   |
| TCGA-06-6390 | FGFR3      | C01RDACXX110628:3:1308:1446:66311   | F              | 1778515         | 1778521         | 7      | 0         | 0    |                                                                                                                                                                                                                                                                                                                                                                                                                                                                                                                                                                                                                                                                                                                                                                                                                                                                                                                                                                                                                                                                                                                                                                                                                                                                                                                                                                                                                                                                                                                                                                                                                                                                                                                                                   |
| TCGA-06-6390 | TACC3      | D03U9ACXX110625:5:2205:12523:196352 | R              | 1778514         | 1778521         | 8      | 1         | 0    |                                                                                                                                                                                                                                                                                                                                                                                                                                                                                                                                                                                                                                                                                                                                                                                                                                                                                                                                                                                                                                                                                                                                                                                                                                                                                                                                                                                                                                                                                                                                                                                                                                                                                                                                                   |
| TCGA-06-6390 | TACC3      | C01PRACXX110628:5:2103:6815:17943   | R              | 1778514         | 1778521         | 8      | 0         | 0    |                                                                                                                                                                                                                                                                                                                                                                                                                                                                                                                                                                                                                                                                                                                                                                                                                                                                                                                                                                                                                                                                                                                                                                                                                                                                                                                                                                                                                                                                                                                                                                                                                                                                                                                                                   |
| TCGA-06-6390 | FGFR3      | C01PRACXX110628:3:1204:10831:2928   | F              | 1778512         | 1778521         | 10     | 0         | 0    |                                                                                                                                                                                                                                                                                                                                                                                                                                                                                                                                                                                                                                                                                                                                                                                                                                                                                                                                                                                                                                                                                                                                                                                                                                                                                                                                                                                                                                                                                                                                                                                                                                                                                                                                                   |
| TCGA-06-6390 | FGFR3      | C01PRACXX110628:5:2204:6732:191360  | F              | 1778512         | 1778521         | 10     | 0         | 0    |                                                                                                                                                                                                                                                                                                                                                                                                                                                                                                                                                                                                                                                                                                                                                                                                                                                                                                                                                                                                                                                                                                                                                                                                                                                                                                                                                                                                                                                                                                                                                                                                                                                                                                                                                   |
| TCGA-06-6390 | FGFR3      | C01PRACXX110628:8:1308:2911:26590   | F              | 1778511         | 1778521         | 11     | 0         | 0    |                                                                                                                                                                                                                                                                                                                                                                                                                                                                                                                                                                                                                                                                                                                                                                                                                                                                                                                                                                                                                                                                                                                                                                                                                                                                                                                                                                                                                                                                                                                                                                                                                                                                                                                                                   |
| TCGA-06-6390 | FGFR3      | C01PRACXX110628:8:2207:4586:84017   | F              | 1778509         | 1778521         | 13     | 0         | 0    |                                                                                                                                                                                                                                                                                                                                                                                                                                                                                                                                                                                                                                                                                                                                                                                                                                                                                                                                                                                                                                                                                                                                                                                                                                                                                                                                                                                                                                                                                                                                                                                                                                                                                                                                                   |
| TCGA-06-6390 | TACC3      | C01PRACXX110628:7:2205:11825:39734  | R              | 1778501         | 1778521         | 21     | 0         | 0    |                                                                                                                                                                                                                                                                                                                                                                                                                                                                                                                                                                                                                                                                                                                                                                                                                                                                                                                                                                                                                                                                                                                                                                                                                                                                                                                                                                                                                                                                                                                                                                                                                                                                                                                                                   |
| TCGA-06-6390 | TACC3      | C01PRACXX110628:6:1106:12159:179499 | R              | 1778494         | 1778521         | 28     | 0         | 0    |                                                                                                                                                                                                                                                                                                                                                                                                                                                                                                                                                                                                                                                                                                                                                                                                                                                                                                                                                                                                                                                                                                                                                                                                                                                                                                                                                                                                                                                                                                                                                                                                                                                                                                                                                   |
| TCGA-06-6390 | TACC3      | D03U9ACXX110625:4:2202:12501:40389  | R              | 1778491         | 1778521         | 31     | 1         | 0    |                                                                                                                                                                                                                                                                                                                                                                                                                                                                                                                                                                                                                                                                                                                                                                                                                                                                                                                                                                                                                                                                                                                                                                                                                                                                                                                                                                                                                                                                                                                                                                                                                                                                                                                                                   |
| TCGA-06-6390 | FGFR3      | C01RDACXX110628:3:1305:3044:13238   | F              | 1778473         | 1778521         | 49     | 0         | 0    |                                                                                                                                                                                                                                                                                                                                                                                                                                                                                                                                                                                                                                                                                                                                                                                                                                                                                                                                                                                                                                                                                                                                                                                                                                                                                                                                                                                                                                                                                                                                                                                                                                                                                                                                                   |
| TCGA-06-6390 | TACC3      | D03U9ACXX110625:5:2205:12523:196352 | R              | 1778470         | 1778521         | 52     | 4         | 0    |                                                                                                                                                                                                                                                                                                                                                                                                                                                                                                                                                                                                                                                                                                                                                                                                                                                                                                                                                                                                                                                                                                                                                                                                                                                                                                                                                                                                                                                                                                                                                                                                                                                                                                                                                   |
| TCGA-06-6390 | TACC3      | C01PRACXX110628:7:2205:11825:39734  | R              | 1778469         | 1778521         | 53     | 1         | 0    |                                                                                                                                                                                                                                                                                                                                                                                                                                                                                                                                                                                                                                                                                                                                                                                                                                                                                                                                                                                                                                                                                                                                                                                                                                                                                                                                                                                                                                                                                                                                                                                                                                                                                                                                                   |
| TCGA-06-6390 | FGFR3      | D03U9ACXX110625:7:2106:4492:173350  | F              | 1778464         | 1778521         | 58     | 0         | 0    |                                                                                                                                                                                                                                                                                                                                                                                                                                                                                                                                                                                                                                                                                                                                                                                                                                                                                                                                                                                                                                                                                                                                                                                                                                                                                                                                                                                                                                                                                                                                                                                                                                                                                                                                                   |
| TCGA-06-6390 | TACC3      | C01PRACXX110628:5:2103:6815:17943   | R              | 1778452         | 1778521         | 70     | 0         | 0    |                                                                                                                                                                                                                                                                                                                                                                                                                                                                                                                                                                                                                                                                                                                                                                                                                                                                                                                                                                                                                                                                                                                                                                                                                                                                                                                                                                                                                                                                                                                                                                                                                                                                                                                                                   |
| TCGA-12-0826 | TACC3      | 61C59AAXX100217:4:93:15133:6133     | R              | 1778495         | 1778502         | 8      | 0         | 0    | GGACAAGGGCAAGTATCAGGTCGACTGCCATCCCTA<br>ACACACACAGGGGGCTAAGGCAAGG***GAGGGCA<br>GGACAAGGGCAAGTATCAGGTCGACTGCCATCCCTA<br>ACACACACAGGGGGCTAAGGCAAGG***GAGGGCA<br>ATGCCCTC***CCCTGCCCTAGCCCTGTGTGTGTAGG<br>GGATGGCAGTCAGACTGATACCTTGCCTGTGTC<br>GCCTATGCCCTC***CCCTGCCCTAGCCCTGTGTGTGT<br>TAGGGATGGCAGTCAGACTGATACCTTGCCTCT<br>GTGCCACCCGCTATGCCCTC***CCCTGCCCTAGCCCT<br>CTGTGTGTGTAGGGGATGGCAGTCAGACTGATCAG<br>TGACTGCCATCCCTAACACACACAGGGGGCTAAGGGCAG<br>GG***GAGGGCAGTGGGGGGGACACAGGCAAGG<br>TGACTGCCATCCCTAACACACACAGGGGGCTAAGGGCAG<br>GG***GAGGGCAGTGGGGGGGACACAGGCAAGG<br>TGCCATCCCTAACACACACAGGGGGCTAAGGGCAGG***<br>GAGGGCAGTGGGGGGGACACAGGCAAGG<br>CACACAGGGGGCTAAGGGCAGG***GAGGGCAGTGGGG<br>GGGGGGACAGGCCCGGAGGCACTCAGCTCGGGGG<br>GACGTCACCCAGCTGAGTGTGCTGCCCTGGTGCCA<br>CCCGCTATGCCCTC***CCCTGCCCTAGCCCTGTG<br>CTTACCGTACCTCCACCAGCTGAGTGTGCTTGGCCT<br>GGTGCCACCCGCTATGCCCTC***CCCTGCCCTAG<br>GTCTTACCGTACCTCCACCAGCTGAGTGTGCTGGCTCT<br>GCCTGTGTCACCCGCTATGCCCTC***CCCTGCC                                                                                                                                                                                                                                                                                                                                                                                                                                                                                                                                                                                                                                                                                                                                                                  |
| TCGA-12-0826 | TACC3      | 61C59AAXX100217:5:107:10675:16040   | R              | 1778495         | 1778502         | 8      | 0         | 0    |                                                                                                                                                                                                                                                                                                                                                                                                                                                                                                                                                                                                                                                                                                                                                                                                                                                                                                                                                                                                                                                                                                                                                                                                                                                                                                                                                                                                                                                                                                                                                                                                                                                                                                                                                   |
| TCGA-12-0826 | FGFR3      | 61C59AAXX100217:5:108:1809:11295    | F              | 1778494         | 1778502         | 9      | 0         | 0    |                                                                                                                                                                                                                                                                                                                                                                                                                                                                                                                                                                                                                                                                                                                                                                                                                                                                                                                                                                                                                                                                                                                                                                                                                                                                                                                                                                                                                                                                                                                                                                                                                                                                                                                                                   |
| TCGA-12-0826 | FGFR3      | 61C59AAXX100217:5:82:13129:10637    | F              | 1778490         | 1778502         | 13     | 0         | 0    |                                                                                                                                                                                                                                                                                                                                                                                                                                                                                                                                                                                                                                                                                                                                                                                                                                                                                                                                                                                                                                                                                                                                                                                                                                                                                                                                                                                                                                                                                                                                                                                                                                                                                                                                                   |
| TCGA-12-0826 | FGFR3      | 42MJNAXX090813:6:80:691:1877#0      | F              | 1778481         | 1778502         | 22     | 0         | 0    |                                                                                                                                                                                                                                                                                                                                                                                                                                                                                                                                                                                                                                                                                                                                                                                                                                                                                                                                                                                                                                                                                                                                                                                                                                                                                                                                                                                                                                                                                                                                                                                                                                                                                                                                                   |
| TCGA-12-0826 | TACC3      | 61C59AAXX100217:3:75:10586:12881    | R              | 1778470         | 1778502         | 33     | 1         | 0    |                                                                                                                                                                                                                                                                                                                                                                                                                                                                                                                                                                                                                                                                                                                                                                                                                                                                                                                                                                                                                                                                                                                                                                                                                                                                                                                                                                                                                                                                                                                                                                                                                                                                                                                                                   |
| TCGA-12-0826 | TACC3      | 61C59AAXX100217:4:114:5844:3161     | R              | 1778470         | 1778502         | 33     | 1         | 0    |                                                                                                                                                                                                                                                                                                                                                                                                                                                                                                                                                                                                                                                                                                                                                                                                                                                                                                                                                                                                                                                                                                                                                                                                                                                                                                                                                                                                                                                                                                                                                                                                                                                                                                                                                   |
| TCGA-12-0826 | TACC3      | 42MJNAXX090813:5:70:888:108#0       | R              | 1778466         | 1778502         | 37     | 3         | 0    |                                                                                                                                                                                                                                                                                                                                                                                                                                                                                                                                                                                                                                                                                                                                                                                                                                                                                                                                                                                                                                                                                                                                                                                                                                                                                                                                                                                                                                                                                                                                                                                                                                                                                                                                                   |
| TCGA-12-0826 | TACC3      | 61C59AAXX100217:3:55:4966:15975     | R              | 1778451         | 1778502         | 52     | 5         | 0    |                                                                                                                                                                                                                                                                                                                                                                                                                                                                                                                                                                                                                                                                                                                                                                                                                                                                                                                                                                                                                                                                                                                                                                                                                                                                                                                                                                                                                                                                                                                                                                                                                                                                                                                                                   |
| TCGA-12-0826 | FGFR3      | 42MJNAXX090813:5:23:156:1150#0      | F              | 1778447         | 1778502         | 56     | 0         | 0    |                                                                                                                                                                                                                                                                                                                                                                                                                                                                                                                                                                                                                                                                                                                                                                                                                                                                                                                                                                                                                                                                                                                                                                                                                                                                                                                                                                                                                                                                                                                                                                                                                                                                                                                                                   |
| TCGA-12-0826 | FGFR3      | 61C59AAXX100217:4:21:17613:20886    | F              | 1778439         | 1778502         | 64     | 0         | 0    |                                                                                                                                                                                                                                                                                                                                                                                                                                                                                                                                                                                                                                                                                                                                                                                                                                                                                                                                                                                                                                                                                                                                                                                                                                                                                                                                                                                                                                                                                                                                                                                                                                                                                                                                                   |
| TCGA-12-0826 | FGFR3      | 61C59AAXX100217:4:2:4279:6949       | F              | 1778435         | 1778502         | 68     | 0         | 0    |                                                                                                                                                                                                                                                                                                                                                                                                                                                                                                                                                                                                                                                                                                                                                                                                                                                                                                                                                                                                                                                                                                                                                                                                                                                                                                                                                                                                                                                                                                                                                                                                                                                                                                                                                   |
| TCGA-19-5958 | TACC3      | C01RDACXX110628:6:1102:11157:101962 | R              | 1778533         | 1778539         | 7      | 0         | 0    | CGGGGGTGGGAGTGTGCGGGTGACCGGGGGTGGGAGTGT<br>GCAGGTGACCTCCCTGGCCCTTAGCCCTC***GCACTCT<br>CGGGTACCGGGGGAGGAGTGTGAGGGGACCTCCCTG<br>GCCCTTAGCCCTC***GCACTCTGGGGGGCAGGATGGCC<br>GAGTGTGCAAGTACCTCCCTGGCCCTTAGCCCTC***GC<br>ACTCTGGGGGGCAGGATGGCCGGGACGGCAGGGGGA                                                                                                                                                                                                                                                                                                                                                                                                                                                                                                                                                                                                                                                                                                                                                                                                                                                                                                                                                                                                                                                                                                                                                                                                                                                                                                                                                                                                                                                                                          |
| TCGA-19-5958 | TACC3      | C01REACXX110629:2:2104:5009:98392   | R              | 1778517         | 1778539         | 23     | 0         | 0    |                                                                                                                                                                                                                                                                                                                                                                                                                                                                                                                                                                                                                                                                                                                                                                                                                                                                                                                                                                                                                                                                                                                                                                                                                                                                                                                                                                                                                                                                                                                                                                                                                                                                                                                                                   |
| TCGA-19-5958 | TACC3      | C01PRACXX110628:7:2103:12434:91988  | R              | 1778501         | 1778539         | 39     | 0         | 0    |                                                                                                                                                                                                                                                                                                                                                                                                                                                                                                                                                                                                                                                                                                                                                                                                                                                                                                                                                                                                                                                                                                                                                                                                                                                                                                                                                                                                                                                                                                                                                                                                                                                                                                                                                   |
| TCGA-27-1835 | TACC3      | B06UCABXX110322:6:1103:9262:46754   | R              | 1778586         | 1778595         | 10     | 1         | 0    | GGGGAGGCTGCTGTTGGGAGCTGACTGCGGGGACACTGG<br>GAGAAAGCCTGGACCTCAGCGAAT***TGCCCGAGCC<br>ACAGCCTGGGACAGAGGTTGGCTGTGGCA***AGTGCCTGA<br>GGTCCAGGCTTCCACCCAGTGTCCCGGAGTCAGCT<br>TGACTGCGGGGACACTGGTGGAGCCTGGACCTCAGCG<br>ACCT***TCGCACAGCCACTCTGTGCCAGGCTGTGCC<br>CGGGGACACTGGTGGAGGCTGGACCTCAGCGACCT***T<br>CGCACAGCCACTCTGTGGCCAGGCTGTGCCACAGAA<br>GGACACTGGGTGGAGCCTGGACCTCAGCGACCT***TCG<br>ACAGCCACTCTGTGCCAGGCTGTGCCAGAAAGG<br>GAAGCCTGGACCTCAGCGACCT***TGCCACAGCCACTCT<br>GTGCCCGGCTGTGCCAGGCTGTGCCAGAAAGG<br>GAAGCCTGGACCTCAGCGACCT***TGCCACAGCCACTCT<br>GTGCCAGGCTGTGCCAGAAAGGCTGTGCCAGAAAGG<br>TGACCTCAGCGACT***TGCCACAGCCACTCTGTGCC<br>AGGCTGTGCCAGAAAGGCTGTGCCAGAAAGGCTGTGCC<br>GACCTCAGCGACT***TGCCACAGCCACTCTGTGCCAG<br>GCTGTGCCAGAAAGGCTGTGCCAGAAAGGCTGTGCC<br>TACGCACT***TGCCACAGCCACTCTGTGCCAGGCTGT<br>GCCAGAAAGGCTGTGCCAGAAAGGCTGTGCCAGGCTGT<br>CCT***TGCCACAGCCACTCTGTGCCAGGCTGTGCCAG<br>AAGGCCCGCCACACTCAGCACTGTGGGGGACGAG                                                                                                                                                                                                                                                                                                                                                                                                                                                                                                                                                                                                                                                                                                                                                                                                            |
| TCGA-27-1835 | FGFR3      | C00HWABXX110325:4:1201:20980:90877  | F              | 1778567         | 1778595         | 29     | 0         | 0    |                                                                                                                                                                                                                                                                                                                                                                                                                                                                                                                                                                                                                                                                                                                                                                                                                                                                                                                                                                                                                                                                                                                                                                                                                                                                                                                                                                                                                                                                                                                                                                                                                                                                                                                                                   |
| TCGA-27-1835 | TACC3      | B06UCABXX110322:5:1108:14043:83287  | R              | 1778564         | 1778595         | 32     | 0         | 0    |                                                                                                                                                                                                                                                                                                                                                                                                                                                                                                                                                                                                                                                                                                                                                                                                                                                                                                                                                                                                                                                                                                                                                                                                                                                                                                                                                                                                                                                                                                                                                                                                                                                                                                                                                   |
| TCGA-27-1835 | TACC3      | B097UABXX110405:4:2204:19445:88453  | R              | 1778558         | 1778595         | 38     | 0         | 0    |                                                                                                                                                                                                                                                                                                                                                                                                                                                                                                                                                                                                                                                                                                                                                                                                                                                                                                                                                                                                                                                                                                                                                                                                                                                                                                                                                                                                                                                                                                                                                                                                                                                                                                                                                   |
| TCGA-27-1835 | TACC3      | B097UABXX110405:4:2201:20658:44401  | R              | 1778557         | 1778595         | 39     | 2         | 0    |                                                                                                                                                                                                                                                                                                                                                                                                                                                                                                                                                                                                                                                                                                                                                                                                                                                                                                                                                                                                                                                                                                                                                                                                                                                                                                                                                                                                                                                                                                                                                                                                                                                                                                                                                   |
| TCGA-27-1835 | TACC3      | B097UABXX110405:2:2104:15688:71022  | R              | 1778555         | 1778595         | 41     | 0         | 0    |                                                                                                                                                                                                                                                                                                                                                                                                                                                                                                                                                                                                                                                                                                                                                                                                                                                                                                                                                                                                                                                                                                                                                                                                                                                                                                                                                                                                                                                                                                                                                                                                                                                                                                                                                   |
| TCGA-27-1835 | TACC3      | C00HWABXX110325:6:2102:20394:42427  | R              | 1778543         | 1778595         | 53     | 3         | 0    |                                                                                                                                                                                                                                                                                                                                                                                                                                                                                                                                                                                                                                                                                                                                                                                                                                                                                                                                                                                                                                                                                                                                                                                                                                                                                                                                                                                                                                                                                                                                                                                                                                                                                                                                                   |
| TCGA-27-1835 | TACC3      | B09V2ABXX110408:6:1203:18187:141862 | R              | 1778543         | 1778595         | 53     | 0         | 0    |                                                                                                                                                                                                                                                                                                                                                                                                                                                                                                                                                                                                                                                                                                                                                                                                                                                                                                                                                                                                                                                                                                                                                                                                                                                                                                                                                                                                                                                                                                                                                                                                                                                                                                                                                   |
| TCGA-27-1835 | TACC3      | B09V2ABXX110408:8:1205:4774:81604   | R              | 1778537         | 1778595         | 59     | 0         | 0    |                                                                                                                                                                                                                                                                                                                                                                                                                                                                                                                                                                                                                                                                                                                                                                                                                                                                                                                                                                                                                                                                                                                                                                                                                                                                                                                                                                                                                                                                                                                                                                                                                                                                                                                                                   |
| TCGA-27-1835 | TACC3      | C00HWABXX110325:2:1107:16168:23614  | R              | 1778535         | 1778595         | 61     | 0         | 0    |                                                                                                                                                                                                                                                                                                                                                                                                                                                                                                                                                                                                                                                                                                                                                                                                                                                                                                                                                                                                                                                                                                                                                                                                                                                                                                                                                                                                                                                                                                                                                                                                                                                                                                                                                   |
| TCGA-27-1835 | TACC3      | C00HWABXX110325:7:2107:1225:167363  | R              | 1778530         | 1778595         | 66     | 0         | 0    |                                                                                                                                                                                                                                                                                                                                                                                                                                                                                                                                                                                                                                                                                                                                                                                                                                                                                                                                                                                                                                                                                                                                                                                                                                                                                                                                                                                                                                                                                                                                                                                                                                                                                                                                                   |
| TCGA-27-1835 | TACC3      | B097UABXX110405:2:2104:15688:71022  | R              | 1778523         | 1778595         | 73     | 0         | 0    |                                                                                                                                                                                                                                                                                                                                                                                                                                                                                                                                                                                                                                                                                                                                                                                                                                                                                                                                                                                                                                                                                                                                                                                                                                                                                                                                                                                                                                                                                                                                                                                                                                                                                                                                                   |

Table S3 continuation

| sample       | gene  | split2                              | readi ID | direction | split hg18 | start split2 | hg18 stop | split2 | length2 | mismatch2 | gap2 | seq mate                                                                                                                                                                                                                                                                                                                                                                                                                                                                                                                                                                                                                                                                                                                                                                                                                                                                                                                                                                                                                                                                                                                                                                                                                                                                                                                                                                                                                                                                                                                                                                                                                                                       |
|--------------|-------|-------------------------------------|----------|-----------|------------|--------------|-----------|--------|---------|-----------|------|----------------------------------------------------------------------------------------------------------------------------------------------------------------------------------------------------------------------------------------------------------------------------------------------------------------------------------------------------------------------------------------------------------------------------------------------------------------------------------------------------------------------------------------------------------------------------------------------------------------------------------------------------------------------------------------------------------------------------------------------------------------------------------------------------------------------------------------------------------------------------------------------------------------------------------------------------------------------------------------------------------------------------------------------------------------------------------------------------------------------------------------------------------------------------------------------------------------------------------------------------------------------------------------------------------------------------------------------------------------------------------------------------------------------------------------------------------------------------------------------------------------------------------------------------------------------------------------------------------------------------------------------------------------|
| TCGA-06-6390 | FGFR3 | D03U9ACXX110625:2:1202:19578:90281  | R        | 1708787   | 1708861    | 75           | 0         | 0      |         |           |      | GACGTCCACCAGCTGAGTGTGGCTGGCTGGTCCCA<br>CCCGCTATGCCCTCCCGCTCCCGCTCCCGGCTCC<br>CAAGAGGGACTCAAGGACTTACAGGAATGTCAGTGTCCC<br>AAGAATCGAATCCACAGGCTGGCTTCCCGGG<br>CAAGAGGGACTCAAGGACTTACAGGAATGTCAGTGTCCC<br>AAGAATCGAATCCACAGGCTGGCTTCCCGGG<br>ATAGGCCCTTAAACAACCTCGTTCCTCAGACACACACAAG<br>ACAGTTCAAGAGGGACTCAAGGACTTACAGGAAT<br>TCAAGAGGGACTCAAGGACTTACAGGAATGTCAGTGTCCC<br>CAAGAAATCGAATCCACAGGCTGGCTTCCCGGG<br>ACCACACACAGCAGTTCAGAGGGACTCAAGGACTTACA<br>GGAATGTCCAGTGTCCCAAGAAATCGAATCCAC<br>GAGTGTGGCTGGTCCACAGGCTATGCCCTCCCGCTGCC<br>GTCCCGGGCATCCATCAGGAAGTCCGGGGACAC<br>CCACCAGCTGAGTGTGGCTGTGGCTGGTGGTCCCGCC<br>CTATGCCCTCCCGCTGGCTGGCTGGTGGTGGTGGTGGT<br>CAAGAGGCTCAGACAGTGCATGAGGGACCCGAGACAGTGC<br>GGCGAGGAAACAGCACAGGGCCCATGCCCGCAAC<br>CAAGAGGCTCAGACAGTGCATGAGGGACCCGAGACAGTGC<br>GGCGAGGAAACAGCACAGGGCCCATGCCCGCAAC<br>CGTTCCTCAGACACACAGGACTTCAAGAGGGACTC<br>AAGGACTTACAGGAATGTCAGGACTTCAAGAGGGACTC<br>CCAGGAATAAGAAATAGGCCCTTAAACAACCTCGTCCCTC<br>AGACCACACAGGACTTCAAGGACTTCAAGAGGGACTC<br>GGCTGTGGCTGGTGGTCCCGCTATGCCCTCCCGCTTNC<br>CGTCCCGGGCATCCATCAGGAAGTCCGGGGACAC<br>GGCTGTGGCTGGTGGTCCCGCTATGCCCTCCCGCTTNC<br>CGTCCCGGGCATCCATCAGGAAGTCCGGGGACAC<br>CTGGCTGTGGCTGGTGGTCCCGCTATGCCCTCCCGCTTNC<br>TGTGTAGAGGGCTGGACCGTGTCTTACCGTGGAC<br>TAAACAACCTCGTTCCTCAGACACACAGGACTTCAA<br>GAGGACTCAAGGACTTACAGGAATGTCAGTGTCCC<br>CACGGCTATCCCGGAGGACGTCGGCGGAAACCAAGCTTG<br>TGGATGTGATTTCTGGTAGCAGTGGACATCTCTG<br>TCCCGCTGGCTGGTGGTCCCGCTCAGGACGTCGGCGG<br>GAAGCAAGCTTGTGGAGTTCGATTTCTGGAGGA<br>AGACCACACAGGACTTCAAGAGGGACTCAAGGACTTCA<br>CAGGAATGTCCAGTGTCCCAAGAAATCGAATCC<br>CCCGCATCCCTCAGGAGCTCCCGGGAGCCAGGCTC<br>TGGATGTGATTTCTGGAGGACTGGACATCTCTG |
| TCGA-12-0826 | FGFR3 | 61C59AAXX100217:4:93:15133:6133     | R        | 1707185   | 1707253    | 69           | 2         | 1      |         |           |      | GGCATGCCCGCCCTCCAGAGGCCACCTTCAAGCAGCT<br>GGTGGAGGACTGGACCGTGTCTTACCGTGAAGTC<br>GGCATGCCCGCCCTCCAGAGGCCACCTTCAAGCAGCT<br>GGTGGAGGACTGGACCGTGTCTTACCGTGAAGTC<br>CGGCGACATACCTGCTGTGCTGGTGGCCACGGGCACTG<br>GTATACAGGACTGTCCCTCAGAGGGGCTCAAAT<br>ATACCTGTGCTCTGGTGGCCACGGGCACTGGTCTACCAG<br>GACTGTCCCTCAGAGGGGCTCAAATGAGTAT<br>AGGATATAGGACTGTCTTCAAGGCCACTCTTAACTGG<br>GGACAAGAGGCAAGTATGACGCTGACATGCCA<br>GGAGGACTGGACTGTCTTACCGTGAAGTCCACCGACG<br>TGAGTGTGCTGTGGCTGGTGGTGGTGGTGGTGGTGGT<br>GGAGGACTGGACCGTGTCTTACCGTGAAGTCCACCGACG<br>TGAGTGTGCTGTGGCTGGTGGTGGTGGTGGTGGTGGT<br>CAAGCACTGGTGGAGGACTGGACCGTGTCTTACCGTGA<br>CGTCCACCGACTGTGAGTGTGGTGGTGGTGGTGGTGGT<br>ACCTTCAAGCAGCTGGTGGAGGACTGGACCGTGTCTTAC<br>CGTGAAGTGTCCACCGACTGAGTGTGGTGGTGGTGGTGGT<br>CAAATTTAGGATATAAGGACTGTCTTCAAGGCCACTCT<br>TAACTGGGGACAAGAGGGCAAGTATAGGCTA<br>TACCTGTGCTGTGGTGGTGGTGGTGGTGGTGGTGGTGGT<br>GCTGTCCCTCCGAGGGGGTCAAATTTAGGATATA<br>AACTTGAAGTATAAGGACTGTCTTCAAGGCCACTCTTA<br>AACTGGGGACAAGAGGGCAAGTATAGGCTGA                                                                                                                                                                                                                                                                                                                                                                                                                                                                                                                                                                                                                                                               |
| TCGA-19-5958 | FGFR3 | C01RDACXX110628:6:1102:11157:101962 | R        | 1707202   | 1707270    | 69           | 1         | 0      |         |           |      | AGCTGGTGGAGGACTGGACCGTGTCTTACCGTGAAGTCC<br>ACCGACTGAGTGTGGCTGGCTGGTGGTGGTGGTGGTGGT<br>GCGCCCTCCAGAGGGCCACTTCAAGCAGCTGGTGGAGG<br>ACCTGAGCAGTGTCTTACCGTGAAGTCCACCGACG<br>GCGGAGTGTGGCATGCCCGCCCTCCAGAGGCCACCC<br>TTCAAGCAGCTGGTGGAGGACTGGACCGTGTCTT                                                                                                                                                                                                                                                                                                                                                                                                                                                                                                                                                                                                                                                                                                                                                                                                                                                                                                                                                                                                                                                                                                                                                                                                                                                                                                                                                                                                              |
| TCGA-27-1835 | FGFR3 | B06UCABXX110322:6:1103:9262:46754   | R        | 1709397   | 1709462    | 66           | 2         | 0      |         |           |      | CCTCCACTGGTCTCAGGGGTGGGGTCCCTCCGGGGCT<br>GGCGGGGGAGGACTGGACGGCTGCAGGGGGTT<br>TCAGGCGAGCAAGAACCACTCACTGCTGAAGGCCACCA<br>GAGGCCAAGCCATGCCAGGGGGAGAGTCCCGG<br>TACATGATCATGCGGGGGGCTGGCATGCCCGCCCTCCA<br>GAGGCCACCTTCAAGCAGCTGGTGGAGGGCCGG<br>GGTGGAAAGCGGGGGGCTCACTCTGAGGCGCTGCCCG<br>CAGGGACATGATCATGCGGGGGTGGCTGGCTGGG<br>GCGCCCTCCAGAGGCCACTTCAAGCAGCTGGTGGAGG<br>ACCTGGACCGTGTCTTACCGTGAAGTCCACCGACG<br>CCTGCCCCAGAGTGTGAGGTGGTGGGGGGGGCTTCTG<br>GGGCACAGCTGGGCACAGAGGTGGCTGTGCAGAGG<br>GCAGGTACATGATCATGCGGGGGTGGCGGATTTGGGACC<br>TTCCCTGGGGCACCCCTCTCCGGTGTGGTGGG<br>GCAGGTACATGATCATGCGGGAGTGGTGGATGCCCGCCC<br>TCCCGAGGACCACTTCCAGCAGCCGGGGGAGGG<br>CCCGAATAAGTGGGAAGCGGGGGCTCACTCTGAGCG<br>CCTGACCCGAGGTACATGAGCATGCGGGAGTGGCG<br>GCTGTCTTACCGTGAAGTCCACAGGACTGAGTGTGGCT<br>TGCCCTGTCACCCCGCTTCCCGCTCCCGCTG<br>ACATGATCATGCGGGAGTGTGGCATGCCCGCCCGCCAG<br>AGGCCACTTCAAGCAGCTGGTGGAGGACTTGA<br>GCCTTGTGGGGACAAGGCTGGGCACAGGAGTGGCTGTGCG<br>AAGTGTGCTGAGGTTCCAGGCTCCACCCAGTGTCC                                                                                                                                                                                                                                                                                                                                                                                                                                                                                                                                                                                                                                                                              |

**Table S4.** IDH1 and IDH2 status and clinical data of GBM patients harboring FGFR-TACC gene fusions

| <b>Samples</b> | <b>Type</b> | <b>Time</b> | <b>Status</b> | <b>Age at initial pathologic diagnosis</b> | <b>IDH1-2 status (Sanger)</b> | <b>IDH1-2 status (exome)</b> |
|----------------|-------------|-------------|---------------|--------------------------------------------|-------------------------------|------------------------------|
| TCGA-12-0826   | FGFR3-TACC3 | 845         | DEAD          | 38                                         | WT                            | WT                           |
| TCGA-27-1835   | FGFR3-TACC3 | 648         | DEAD          | 53                                         | NA                            | WT                           |
| TCGA-19-5958   | FGFR3-TACC3 | 164         | ALIVE         | 56                                         | NA                            | WT                           |
| TCGA-06-6390   | FGFR3-TACC3 | 163         | DEAD          | 58                                         | WT                            | WT                           |
| GBM-22         | FGFR3-TACC3 | 390         | DEAD          | 60                                         | WT                            | NA                           |
| GBM-1123       | FGFR3-TACC3 | NA          | DEAD          | 62                                         | WT                            | NA                           |
| GBM-51         | FGFR1-TACC1 | NA          | NA            | NA                                         | WT                            | NA                           |

Time = Survival (days after diagnosis)

Sanger = analysis done by Sanger sequencing of genomic DNA

Exome = analysis done by the SAVI (Statistical Algorithm for Variant Identification), an algorithm developed to detect point mutation in cancer (BRAF Mutations in Hairy-Cell Leukemia, Tiacci E et al. The New England Journal of Medicine 2011 Jun 16;364(24):2305-15)

NA = Not Available

WT = Wild type sequence for R132 and R172 of IDH1 and IDH2, respectively

**Table S5: *In vitro* and *in vivo* transformation assays**

| Cell line                                                         | Vector | FGFR3 | TACC3 | F1-T1 Fusion | F3-T3 Fusion | F3-T3-K508MFusion |
|-------------------------------------------------------------------|--------|-------|-------|--------------|--------------|-------------------|
| Rat1<br>(# soft agar colonies)                                    | 0      | 0     | 0     | 225.3±10.0   | 198.7±8.0    | 0                 |
| Balb 3T3<br>(# soft agar colonies)                                | 0      | 0     | 0     | n.d.         | 45.5±8.9     | n.d.              |
| Rat1 A<br>(# mice with tumor)                                     | 0/5    | 0/5   | 0/5   | n.d.         | 5/5          | n.d.              |
| <i>Ink4A;Arf</i> <sup>-/-</sup> Astrocytes<br>(# mice with tumor) | 0/9    | 0/5   | 0/5   | 8/8          | 12/12        | 0/8               |

n.d.: not done

**Table S6: Chromosomal segregation defects induced by FGFR-TACC fusions**

| <b>Cell line</b>                               | <b>Metaphases inspected</b> | <b>Cells with segregation defects (%±SD)</b> | <b>Metaphases with misaligned chromosomes (%±SD)</b> | <b>Anaphases with lagging chromosomes (%±SD)</b> | <b>Anaphases/telophases with chromosome bridges (%±SD)</b> |
|------------------------------------------------|-----------------------------|----------------------------------------------|------------------------------------------------------|--------------------------------------------------|------------------------------------------------------------|
| Rat1A<br>Vector                                | 150                         | 9.5±3.8                                      | 2.3±1.7                                              | 2.4±0.9                                          | 5.4±2.4                                                    |
| Rat1A<br>FGFR3-TACC3                           | 150                         | 27.4±3.9                                     | 8.0±2.6                                              | 8.0±1.0                                          | 11.2±0.7                                                   |
| Rat1A<br>FGFR1-TACC1                           | 100                         | 45.5±3.1                                     | 5±2.8                                                | 10±1.4                                           | 31.5±4.9                                                   |
| <i>Ink4A;ARF</i> <sup>-/-</sup><br>Vector      | 100                         | 7.3±1.5                                      | 2.2±1.5                                              | 2.0±0.7                                          | 3.3±0.6                                                    |
| <i>Ink4A;ARF</i> <sup>-/-</sup><br>FGFR3-TACC3 | 100                         | 18.3±1.5                                     | 6.0±1.1                                              | 6.5±1.3                                          | 11.2±0.7                                                   |

**Table S7: Analysis of chromosomal number**

| <b>Cell line</b>             | <b>Number of cells counted</b> | <b>Percent aneuploidy</b> | <b>Range</b> | <b>Mean number</b> | <b>Average variation from mean number</b> | <b>p- value</b>                   |
|------------------------------|--------------------------------|---------------------------|--------------|--------------------|-------------------------------------------|-----------------------------------|
| Rat1A Vector                 | 100                            | 27                        | 35-43        | 41.2               | 1.2                                       | n.s.<br>n.s.<br><0.0001<br><0.001 |
| Rat1A FGFR3                  | 100                            | 33                        | 35-44        | 42.1               | 1.3                                       |                                   |
| Rat1A TACC3                  | 100                            | 41                        | 34-46        | 40.7               | 1.1                                       |                                   |
| Rat1A FGFR3-TACC3            | 100                            | 69                        | 35-73        | 43.8               | 3.1                                       |                                   |
| Human Astrocytes Vector      | 100                            | 8                         | 42-46        | 45.85              | 0.28                                      |                                   |
| Human Astrocytes FGFR3-TACC3 | 100                            | 42                        | 28-48        | 42.24              | 3.33                                      |                                   |

**Table S8.** Chromosome analysis by SKY of 20 cells from the GSC-1123 culture

| Cell # | Chr # | +1 | +2 | +3 | t(3;14) | +4 | (-4) | del(4) | +5 | +6 | +7 | del(7) | +8 | -9 | +9 | -10 | +10 | +11 |
|--------|-------|----|----|----|---------|----|------|--------|----|----|----|--------|----|----|----|-----|-----|-----|
| 1      | 97    | 2  | 2  | 2  |         | 2  |      | 1      | 2  | 2  | 4  |        | 2  |    | 2  |     |     | 2   |
| 2      | 51    |    |    |    |         |    |      |        |    |    | 1  |        |    |    |    | 1   |     |     |
| 3      | 49    |    |    |    |         |    |      |        |    |    | 1  |        |    |    |    | 1   |     |     |
| 4      | 50    |    |    |    |         |    |      |        |    |    | 1  |        |    |    |    | 1   |     |     |
| 5      | 49    |    |    |    |         |    |      |        |    |    | 1  |        |    |    |    | 1   |     |     |
| 6      | 86    | 2  | 2  | 2  |         | 2  |      |        | 2  |    | 3  |        | 1  |    | 1  |     |     | 2   |
| 7      | 95    | 2  | 2  | 2  |         | 2  |      |        | 1  | 2  | 4  |        | 2  |    | 2  |     |     | 2   |
| 8      | 98    | 2  | 3  | 2  | 1       | 2  |      |        | 1  | 2  | 4  |        | 3  |    | 1  |     |     | 2   |
| 9      | 86    | 2  | 1  | 1  | 1       | 1  |      |        | 1  | 1  | 6  |        | 2  |    | 3  |     | 1   | 1   |
| 10     | 44    |    |    | 1  | 1       |    | 1    |        |    |    | 1  | 1      |    | 1  |    | 1   |     |     |
| 11     | 49    |    |    |    |         |    |      |        |    |    | 1  | 1      |    |    |    | 1   |     |     |
| 12     | 49    |    |    |    |         |    |      |        |    |    | 1  |        |    |    |    | 1   |     |     |
| 13     | 98    | 2  | 2  | 2  | 2       |    |      |        | 2  | 2  | 4  |        | 2  |    | 2  |     |     | 2   |
| 14     | 49    |    |    |    |         |    |      |        |    |    | 1  |        |    |    |    | 1   |     |     |
| 15     | 48    |    |    |    |         |    |      |        |    |    | 1  |        |    |    |    | 1   |     |     |
| 16     | 51    |    |    |    |         |    |      |        |    |    | 1  |        |    |    |    | 1   |     |     |
| 17     | 49    |    |    |    |         |    |      |        |    |    | 1  |        |    |    |    | 1   |     |     |
| 18     | 50    |    |    |    |         |    |      |        |    |    | 1  | 1      |    |    |    | 1   |     |     |
| 19     | 49    |    |    |    |         |    |      |        |    |    | 1  |        |    |    |    | 1   |     |     |
| 20     | 49    |    |    |    |         |    |      |        |    |    | 1  |        |    |    |    | 1   |     |     |



**Table S8 continuation**

| Cell # | Chr # | +12 | +13 | del(13) | -14 | +14 | +15 | -16 | +16 | +17 | +18 | +19 | +20 | -21 | +21 | -22 | +22 | +X |
|--------|-------|-----|-----|---------|-----|-----|-----|-----|-----|-----|-----|-----|-----|-----|-----|-----|-----|----|
| 1      | 97    | 2   | 2   | 2       |     | 2   | 2   |     | 2   | 2   | 3   | 4   | 4   |     | 2   |     | 2   | 2  |
| 2      | 51    |     | 2   | 2       |     |     |     |     |     |     | 1   | 1   | 1   |     |     |     |     |    |
| 3      | 49    |     |     | 1       |     |     |     |     |     |     | 1   | 1   | 1   |     |     |     |     |    |
| 4      | 50    |     |     | 1       |     |     |     |     |     |     | 1   | 1   | 1   |     |     |     |     | 1  |
| 5      | 49    |     |     | 1       |     |     |     |     |     |     | 1   | 1   | 1   |     |     |     |     |    |
| 6      | 86    | 2   | 2   | 2       |     | 2   | 2   |     |     | 2   | 4   | 3   | 3   |     | 1   |     |     | 2  |
| 7      | 95    | 2   | 2   | 2       |     | 2   | 2   |     | 2   | 2   | 4   | 2   | 4   |     | 2   |     | 2   | 2  |
| 8      | 98    | 2   | 2   | 2       |     | 2   | 2   |     | 2   | 2   | 3   | 4   | 4   |     | 3   |     | 2   | 2  |
| 9      | 86    | 2   | 2   | 2       |     |     |     |     | 2   | 1   | 4   | 3   | 1   |     | 2   |     | 1   | 2  |
| 10     | 44    |     |     |         | 1   |     |     | 1   |     |     | 1   |     | 1   |     |     | 1   |     |    |
| 11     | 49    |     |     |         |     |     |     |     |     |     | 1   | 1   | 1   |     |     |     |     |    |
| 12     | 49    |     |     | 1       |     |     |     |     |     |     | 1   | 1   | 1   |     |     |     |     |    |
| 13     | 98    | 2   | 2   |         |     | 2   | 2   |     | 2   | 2   | 4   | 4   | 4   |     | 2   | 2   |     | 2  |
| 14     | 49    |     |     | 1       |     |     |     |     |     |     | 1   | 1   | 1   |     |     |     |     |    |
| 15     | 48    |     |     |         |     |     |     |     |     |     | 1   | 1   | 1   | 1   |     |     |     |    |
| 16     | 51    |     |     | 1       |     | 1   |     |     |     |     | 1   |     |     |     |     |     | 2   | 1  |
| 17     | 49    |     | 1   |         |     |     |     |     |     |     | 1   | 1   | 1   |     |     |     |     |    |
| 18     | 50    |     | 1   | 1       |     |     |     |     |     |     | 1   | 1   | 1   |     |     |     |     |    |
| 19     | 49    |     |     |         |     |     |     |     |     |     | 1   | 1   | 1   |     |     |     |     |    |
| 20     | 49    |     |     | 1       |     |     |     |     |     |     | 1   | 1   | 1   |     |     |     |     |    |

**Table S9: Analysis of chromosomal number in Rat1A cells treated with the FGFR3 inhibitor PD173074**

| <b>Cell line</b>              | <b>Number of cells counted</b> | <b>Percent aneuploidy</b> | <b>Range</b> | <b>Mean number</b> | <b>Average variation from mean number</b> | <b>p- value</b> |
|-------------------------------|--------------------------------|---------------------------|--------------|--------------------|-------------------------------------------|-----------------|
| Rat1A Vector<br>DMSO          | 100                            | 38                        | 37-55        | 41.7               | 1.10                                      | n.s.            |
| Rat1A Vector<br>PD173074      | 100                            | 39                        | 37-46        | 42.0               | 0.77                                      |                 |
| Rat1A FGFR3-TACC3<br>DMSO     | 100                            | 88                        | 31-96        | 43.7               | 4.11                                      | <0.0001         |
| Rat1A FGFR3-TACC3<br>PD173074 | 100                            | 49                        | 31-48        | 42.0               | 1.28                                      | <0.0001         |
